# Supplementary material for: Microbial community organization designates distinct pulmonary exacerbation types and predicts treatment outcome in cystic fibrosis
Source: Research Square preprint supplement (doi:10.21203/rs.3.rs-4128740/v1), 2024-03-21
Supplement: Supplementary file 1 [file 33e605dac69c1aa214ae31b1.xlsx]

## Sheet: Sheet 1
									PexType (n instances of 880 total samples)
ID	Domain	Phylum	Class	Order	Family	Genus	Species	ASVgroup	PAT	AN1	AN2
65d43491988bfe557da4d86a5ba25dae	d__Bacteria	p__Firmicutes	c__Bacilli	o__Staphylococcales	f__Staphylococcaceae	g__Staphylococcus		pathogen	261	112	176
b7b4ecb07e1719860260746a5443092a	d__Bacteria	p__Bacteroidota	c__Bacteroidia	o__Bacteroidales	f__Prevotellaceae	g__Prevotella	s__Prevotella_histicola	anaerobe	143	192	81
923f521b9cf313f1f95c9367e09bbc1c	d__Bacteria	p__Firmicutes	c__Negativicutes	o__Veillonellales-Selenomonadales	f__Veillonellaceae	g__Veillonella		anaerobe	234	260	257
ff9d93d7b7e46787568f2d241caeaf3b	d__Bacteria	p__Proteobacteria	c__Gammaproteobacteria	o__Pseudomonadales	f__Pseudomonadaceae	g__Pseudomonas		pathogen	231	199	90
5648dccee530d68ceb3e4d7d22cf8756	d__Bacteria	p__Proteobacteria	c__Gammaproteobacteria	o__Pseudomonadales	f__Pseudomonadaceae	g__Pseudomonas		pathogen	6	9	8
edc9e5c16e40aff1eadce6597940f08f	d__Bacteria	p__Firmicutes	c__Bacilli	o__Lactobacillales	f__Streptococcaceae	g__Streptococcus		facultative anaerobe	237	255	258
0999f4e86c94093f74e23b12501455f8	d__Bacteria	p__Actinobacteriota	c__Actinobacteria	o__Bifidobacteriales	f__Bifidobacteriaceae	g__Scardovia	s__Scardovia_wiggsiae	anaerobe	144	81	124
6e5c5e8ab4e07833bd4a8ec94f14dcb9	d__Bacteria	p__Actinobacteriota	c__Coriobacteriia	o__Coriobacteriales	f__Atopobiaceae	g__Atopobium		facultative anaerobe	23	5
1739d8f19c1ac366a2138b64b03047a9	d__Bacteria	p__Actinobacteriota	c__Actinobacteria	o__Micrococcales	f__Micrococcaceae	g__Rothia	s__Rothia_mucilaginosa	aerobe	88	72	74
2740cf2417c92847cc298cbd71dd1fcd	d__Bacteria	p__Firmicutes	c__Negativicutes	o__Veillonellales-Selenomonadales	f__Veillonellaceae	g__Veillonella		anaerobe	170	131	172
d83f60183d81253a505beaeef3cd168f	d__Bacteria	p__Actinobacteriota	c__Actinobacteria	o__Micrococcales	f__Micrococcaceae	g__Rothia	s__uncultured_bacterium	aerobe	219	158	171
06f825b512d903b9230e1a55d87359ee	d__Bacteria	p__Firmicutes	c__Bacilli	o__Lactobacillales	f__Streptococcaceae	g__Streptococcus		facultative anaerobe	250	240	255
d114fb4c335125128be28401522dd41a	d__Bacteria	p__Firmicutes	c__Bacilli	o__Lactobacillales	f__Streptococcaceae	g__Lactococcus	s__Lactococcus_lactis	facultative anaerobe	29	1	1
fd2eb1fe2266eed160a855f715f7c77e	d__Bacteria	p__Firmicutes	c__Bacilli	o__Lactobacillales	f__Streptococcaceae	g__Streptococcus	s__Streptococcus_anginosus	facultative anaerobe	55	19	125
56bde454092279f47b556883d5909620	d__Bacteria	p__Firmicutes	c__Bacilli	o__Lactobacillales	f__Streptococcaceae	g__Streptococcus		facultative anaerobe	72	89	54
cd9401a6bce4a63af516d06d2a843f9d	d__Bacteria	p__Firmicutes	c__Negativicutes	o__Veillonellales-Selenomonadales	f__Veillonellaceae	g__Veillonella		anaerobe	228	211	244
2bd9309f2f97cae51d18d06ea1ca519a	d__Bacteria	p__Firmicutes	c__Bacilli	o__Lactobacillales	f__Carnobacteriaceae	g__Granulicatella		facultative anaerobe	225	233	252
fd496fd32dc8c08ade2e8b6c9d8ee13d	d__Bacteria	p__Firmicutes	c__Bacilli	o__Lactobacillales	f__Streptococcaceae	g__Streptococcus	s__Streptococcus_salivarius	facultative anaerobe	168	221	246
3bae00d865b43e800a6f297f958ac2de	d__Bacteria	p__Firmicutes	c__Negativicutes	o__Veillonellales-Selenomonadales	f__Veillonellaceae	g__Veillonella		anaerobe	16	2
394eda29c886632f514dd94b58381186	d__Bacteria	p__Proteobacteria	c__Gammaproteobacteria	o__Pasteurellales	f__Pasteurellaceae	g__Haemophilus		facultative anaerobe	37	60	114
85c44c83eddc5d3028261a1000b7d0e1	d__Bacteria	p__Firmicutes	c__Bacilli	o__Staphylococcales	f__Gemellaceae	g__Gemella		facultative anaerobe	157	173	238
2721fd42d5373667f111c60faaf21eac	d__Bacteria	p__Actinobacteriota	c__Actinobacteria	o__Micrococcales	f__Micrococcaceae	g__Rothia		aerobe	30	123	85
36ce67b3fecce277df99829617975495	d__Bacteria	p__Actinobacteriota	c__Actinobacteria	o__Micrococcales	f__Micrococcaceae	g__Rothia		aerobe	88	37	66
dcba105f35d8ebc9e22269c7491ad3a7	d__Bacteria	p__Proteobacteria	c__Gammaproteobacteria	o__Xanthomonadales	f__Xanthomonadaceae	g__Stenotrophomonas		pathogen	63	41	19
0920dcf0f62fb2b3ab9e32f1c4edec37	d__Bacteria	p__Proteobacteria	c__Gammaproteobacteria	o__Burkholderiales	f__Comamonadaceae			aerobe	8
6376ea6dab7d0fde3cd66f53b57e1484	d__Bacteria	p__Proteobacteria	c__Gammaproteobacteria	o__Pseudomonadales	f__Pseudomonadaceae	g__Pseudomonas		pathogen	1
ca9c66d47347c03d0343d6fe03ed8636	d__Bacteria	p__Proteobacteria	c__Gammaproteobacteria	o__Pasteurellales	f__Pasteurellaceae	g__Haemophilus		facultative anaerobe	23	56	57
1b51357852b0b814b4d9918c6f0ab762	d__Bacteria	p__Firmicutes	c__Bacilli	o__Lactobacillales	f__Streptococcaceae	g__Streptococcus		facultative anaerobe	45	75	107
df8456a1abbfb4c8a2c450b44378d4cb	d__Bacteria	p__Actinobacteriota	c__Actinobacteria	o__Actinomycetales	f__Actinomycetaceae	g__Actinomyces	s__Schaalia_odontolytica	facultative anaerobe	25	54	135
0ed3a6836e138f14044f6950ad7280d2	d__Bacteria	p__Actinobacteriota	c__Actinobacteria	o__Actinomycetales	f__Actinomycetaceae	g__Actinomyces		facultative anaerobe	71	15	95
c0260f7f44a97c38324f4332beb45ed6	d__Bacteria	p__Firmicutes	c__Bacilli	o__Staphylococcales	f__Staphylococcaceae	g__Staphylococcus		pathogen	2
d46e2205f0c6ecf67b51f83d111c509c	d__Bacteria	p__Proteobacteria	c__Gammaproteobacteria	o__Enterobacterales	f__Enterobacteriaceae	g__Escherichia-Shigella		aerobe	6	1	5
72c252ce87c3b234279189b32c2c6a08	d__Bacteria	p__Firmicutes	c__Bacilli	o__Lactobacillales	f__Carnobacteriaceae	g__Granulicatella		facultative anaerobe	2		6
7d135dfbf857c62673695ef24332b100	d__Bacteria	p__Actinobacteriota	c__Actinobacteria	o__Micrococcales	f__Micrococcaceae	g__Rothia		aerobe	67	32	96
29fbc7e5021229480248fa7466a499a2	d__Bacteria	p__Firmicutes	c__Bacilli	o__Lactobacillales	f__Aerococcaceae	g__Abiotrophia	s__uncultured_bacterium	facultative anaerobe	28	3	4
32f8fd11d2bee278d609a1d4ab767554	d__Bacteria	p__Bacteroidota	c__Bacteroidia	o__Bacteroidales	f__Prevotellaceae	g__Prevotella	s__Prevotella_melaninogenica	anaerobe	118	220	242
942ec60e75a4f9183b9b69cbf8960379	d__Bacteria	p__Firmicutes	c__Bacilli	o__Lactobacillales	f__Carnobacteriaceae	g__Granulicatella		facultative anaerobe	4	8	24
ecc423b8fefd03a92aa1a97fc74a654c	d__Bacteria	p__Proteobacteria	c__Gammaproteobacteria	o__Burkholderiales	f__Alcaligenaceae	g__Achromobacter		pathogen	40	47	108
d15bc449222795a9ff230013aa633686	d__Bacteria	p__Proteobacteria	c__Gammaproteobacteria	o__Pseudomonadales	f__Moraxellaceae	g__Acinetobacter		aerobe	1	2	2
785d67b0c0232c96a21b7bf1c46f0a79	d__Bacteria	p__Bacteroidota	c__Bacteroidia	o__Bacteroidales	f__Prevotellaceae	g__Prevotella	s__Prevotella_melaninogenica	anaerobe	12	12	68
09e996f449e880d1fd8f27d59e8d8b11	d__Bacteria	p__Firmicutes	c__Bacilli	o__Lactobacillales	f__Lactobacillaceae	g__Lactobacillus		facultative anaerobe	3	1	4
7f862b96f58f9f2a310e849bd3a65069	d__Bacteria	p__Bacteroidota	c__Bacteroidia	o__Bacteroidales	f__Prevotellaceae	g__Prevotella	s__Prevotella_denticola	anaerobe	40	80	113
cbef40f459197faa8de7bba6a4764a34	d__Bacteria	p__Bacteroidota	c__Bacteroidia	o__Bacteroidales	f__Prevotellaceae	g__Prevotella	s__Prevotella_pallens	anaerobe	2	42	95
3916a456bb0a3bfd02c15fd537ff5923	d__Bacteria	p__Firmicutes	c__Negativicutes	o__Veillonellales-Selenomonadales	f__Veillonellaceae	g__Megasphaera	s__Megasphaera_micronuciformis	anaerobe	23	125	177
8b53c1e7c9d8c5c7f2478c690c456448	d__Bacteria	p__Firmicutes	c__Clostridia	o__Lachnospirales	f__Lachnospiraceae	g__Oribacterium		anaerobe	74	157	219
fae6d0c5cd2a53341a4ec984541b1541	d__Bacteria	p__Fusobacteriota	c__Fusobacteriia	o__Fusobacteriales	f__Fusobacteriaceae	g__Fusobacterium		anaerobe	27	130	106
f0232e28323111f209fbb997f84dd4a7	d__Bacteria	p__Bacteroidota	c__Bacteroidia	o__Bacteroidales	f__Prevotellaceae	g__Prevotella	s__Prevotella_salivae	anaerobe	47	222	226
e502ebea2a54a6f839d310d6d57e7d47	d__Bacteria	p__Fusobacteriota	c__Fusobacteriia	o__Fusobacteriales	f__Fusobacteriaceae	g__Fusobacterium		anaerobe	6	81	64
d632de5c3fc21bbd74ec98ccfcd20ed9	d__Bacteria	p__Bacteroidota	c__Bacteroidia	o__Bacteroidales	f__Prevotellaceae	g__Prevotella	s__Prevotella_loescheii	anaerobe	13		1
f67106d07b885d4d811daca7688633ed	d__Bacteria	p__Bacteroidota	c__Bacteroidia	o__Bacteroidales	f__Prevotellaceae	g__Prevotella	s__Prevotella_oris	anaerobe	52	64	89
eae880eaa9c99650e399d9b4eb5dd3b0	d__Bacteria	p__Firmicutes	c__Negativicutes	o__Veillonellales-Selenomonadales	f__Veillonellaceae	g__Veillonella		anaerobe	20	46	46
76a2a89fb35336e7b117fc44ff915092	d__Bacteria	p__Firmicutes	c__Negativicutes	o__Veillonellales-Selenomonadales	f__Veillonellaceae	g__Veillonella		anaerobe	26	77	87
7ba04a00b7566eb1959c8f459fbc8322	d__Bacteria	p__Firmicutes	c__Bacilli	o__Lactobacillales	f__Streptococcaceae	g__Streptococcus		facultative anaerobe	104	49	31
b0b4dde3991e8da02f84cf77e5a35d63	d__Bacteria	p__Campilobacterota	c__Campylobacteria	o__Campylobacterales	f__Campylobacteraceae	g__Campylobacter		aerobe	16	95	164
f9612c98d79c37a803a973724113cef6	d__Bacteria	p__Actinobacteriota	c__Coriobacteriia	o__Coriobacteriales	f__Atopobiaceae	g__Atopobium	s__uncultured_bacterium	facultative anaerobe	126	234	245
e7cfd084265c4df4856ca07b1c9b24ee	d__Bacteria	p__Firmicutes	c__Bacilli	o__Lactobacillales	f__Streptococcaceae	g__Streptococcus	s__Streptococcus_mutans	facultative anaerobe	23	19	100
d23dcbe0b3e253d3d5f462f07b5bea0b	d__Bacteria	p__Firmicutes	c__Clostridia	o__Lachnospirales	f__Lachnospiraceae	g__Stomatobaculum	s__uncultured_bacterium	anaerobe	7	27	98
818434292143daca42a3168f3728da82	d__Bacteria	p__Firmicutes	c__Negativicutes	o__Veillonellales-Selenomonadales	f__Veillonellaceae	g__Dialister		anaerobe	9	20	55
1637345f45b90ef2aba65723fddc6151	d__Bacteria	p__Firmicutes	c__Bacilli	o__Lactobacillales	f__Streptococcaceae	g__Streptococcus		facultative anaerobe	51		1
e341d76ffa2250ed506c5fb284abdca6	d__Bacteria	p__Firmicutes	c__Clostridia	o__Lachnospirales	f__Lachnospiraceae	g__Lachnoanaerobaculum		anaerobe	42	186	194
366bb3ddd63d135bec172051cf2cfe0a	d__Bacteria	p__Actinobacteriota	c__Actinobacteria	o__Actinomycetales	f__Actinomycetaceae	g__Actinomyces	s__Actinomyces_graevenitzii	facultative anaerobe	26	69	159
d8a05ea8aecfcf5910db345be88e712a	d__Bacteria	p__Bacteroidota	c__Bacteroidia	o__Bacteroidales	f__Prevotellaceae	g__Prevotella	s__Prevotella_nanceiensis	anaerobe	32	20	18
37ab4ef1ea2e1b3c05fc73c9da192b05	d__Bacteria	p__Firmicutes	c__Clostridia	o__Lachnospirales	f__Lachnospiraceae	g__Oribacterium	s__uncultured_organism	anaerobe	51	72	168
4f5efd25dacb5d639316e7291ff6ff8b	d__Bacteria	p__Proteobacteria	c__Gammaproteobacteria	o__Burkholderiales	f__Neisseriaceae	g__Neisseria		aerobe	17	31	47
300568e1ddcb6356519af1a75ab2df4b	d__Bacteria	p__Firmicutes	c__Clostridia	o__Peptostreptococcales-Tissierellales	f__Anaerovoracaceae	g__Mogibacterium	s__Mogibacterium_diversum	anaerobe	14	61	135
01344f29aa14cf1d706092a4e7721018	d__Bacteria	p__Proteobacteria	c__Gammaproteobacteria	o__Burkholderiales	f__Neisseriaceae	g__Kingella	s__uncultured_bacterium	aerobe	9	20	31
ce54fd570e2891bb1c24b6b985436151	d__Bacteria	p__Bacteroidota	c__Bacteroidia	o__Flavobacteriales	f__Flavobacteriaceae	g__Capnocytophaga		facultative anaerobe		12	22
67a5c29ddb5d1eeda2b8780bb4694235	d__Bacteria	p__Firmicutes	c__Clostridia	o__Lachnospirales	f__Lachnospiraceae	g__Lachnoanaerobaculum		anaerobe	48	23	25
5a2676b27aa16876cffaca5a4dca4669	d__Bacteria	p__Actinobacteriota	c__Actinobacteria	o__Actinomycetales	f__Actinomycetaceae	g__Actinomyces		facultative anaerobe	28	24	107
b022b5312f30be684bdd2cc66030dea5	d__Bacteria	p__Firmicutes	c__Negativicutes	o__Veillonellales-Selenomonadales	f__Veillonellaceae	g__Veillonella	s__Veillonella_sp.	anaerobe	1	17	31
a375ce81db65e848c1f762344851193f	d__Bacteria	p__Fusobacteriota	c__Fusobacteriia	o__Fusobacteriales	f__Leptotrichiaceae	g__Leptotrichia	s__Leptotrichia_hongkongensis	anaerobe		14	18
15bd8361441d322d66a955c10a723c14	d__Bacteria	p__Actinobacteriota	c__Actinobacteria	o__Actinomycetales	f__Actinomycetaceae	g__Actinomyces		facultative anaerobe	7	6	31
c845eda99662b5a88a8c8e979ec07dd0	d__Bacteria	p__Proteobacteria	c__Gammaproteobacteria	o__Burkholderiales	f__Burkholderiaceae	g__Lautropia		aerobe			14
33ba975cdb88b5073a2355ffdf01e9cb	d__Bacteria	p__Actinobacteriota	c__Actinobacteria	o__Bifidobacteriales	f__Bifidobacteriaceae	g__Bifidobacterium		anaerobe	35	4	13
78f1224136a594084b29c27221ef08b9	d__Bacteria	p__Actinobacteriota	c__Coriobacteriia	o__Coriobacteriales	f__Atopobiaceae	g__Atopobium	s__uncultured_Actinomyces	facultative anaerobe	11	1	33
cc2a0f4ca982a6c49e35915841d63c52	d__Bacteria	p__Bacteroidota	c__Bacteroidia	o__Bacteroidales	f__Prevotellaceae	g__Prevotella	s__Prevotella_oulorum	anaerobe	1	4	12
5dad507afd6cecb7185e8d8fe5fe4b4a	d__Bacteria	p__Bacteroidota	c__Bacteroidia	o__Bacteroidales	f__Prevotellaceae	g__Prevotella	s__Prevotella_genomosp.	anaerobe	7	1	36
8480a4a2e9b2bdbe4d50e83fe4814607	d__Bacteria	p__Bacteroidota	c__Bacteroidia	o__Bacteroidales	f__Prevotellaceae	g__Prevotella	s__Prevotella_oulorum	anaerobe	4	1	4
b8ef84c56b07b2868d12614f0ba0bebe	d__Bacteria	p__Firmicutes	c__Negativicutes	o__Veillonellales-Selenomonadales	f__Selenomonadaceae	g__Selenomonas		anaerobe	2	1	13
8e493df449e84acb4e24f5811ff3599b	d__Bacteria	p__Firmicutes	c__Bacilli	o__Erysipelotrichales	f__Erysipelotrichaceae	g__Solobacterium	s__Solobacterium_moorei	anaerobe	5	28	96
39affe4f24aab02b897ece4e7d11f23d	d__Bacteria	p__Bacteroidota	c__Bacteroidia	o__Bacteroidales	f__Porphyromonadaceae	g__Porphyromonas		anaerobe			2
ddb33160e89c4af9a402989f1638c284	d__Bacteria	p__Bacteroidota	c__Bacteroidia	o__Bacteroidales	f__Prevotellaceae	g__Prevotella	s__Prevotella_oris	anaerobe	49	62	73
87461b5f2af4769574e5c3af8b7a3d03	d__Bacteria	p__Bacteroidota	c__Bacteroidia	o__Flavobacteriales	f__Flavobacteriaceae	g__Capnocytophaga	s__Capnocytophaga_granulosa	facultative anaerobe	56	103	75
cdf14d2fed157f8032715a22d3bf4573	d__Bacteria	p__Bacteroidota	c__Bacteroidia	o__Bacteroidales	f__Prevotellaceae	g__Prevotella	s__Prevotella_nigrescens	anaerobe	45	75	126
e93b313352019b8113e7fc66bf757917	d__Bacteria	p__Firmicutes	c__Clostridia	o__Peptostreptococcales-Tissierellales	f__Peptostreptococcales-Tissierellales	g__Parvimonas		anaerobe	33	66	117
2f3da68606254b35e1d68615524c6815	d__Bacteria	p__Bacteroidota	c__Bacteroidia	o__Flavobacteriales	f__Flavobacteriaceae	g__Capnocytophaga	s__Capnocytophaga_gingivalis	facultative anaerobe	81	40	108
d7926eba30ca0f01bac6fc5d090e9ab9	d__Bacteria	p__Bacteroidota	c__Bacteroidia	o__Flavobacteriales	f__Flavobacteriaceae	g__Capnocytophaga		facultative anaerobe	13	4	22
a1b31da3a50890aadc04fca003e3e007	d__Bacteria	p__Firmicutes	c__Bacilli	o__Lactobacillales	f__Streptococcaceae	g__Streptococcus	s__Streptococcus_anginosus	facultative anaerobe	22	56	24
f4e78e2e397dc8bd3ca2f87c245a8773	d__Bacteria	p__Fusobacteriota	c__Fusobacteriia	o__Fusobacteriales	f__Fusobacteriaceae	g__Fusobacterium		anaerobe	21	5	39
224102d609b83a172b11bd9115107f16	d__Bacteria	p__Bacteroidota	c__Bacteroidia	o__Bacteroidales	f__Porphyromonadaceae	g__Porphyromonas		anaerobe	65	31	86
66a9ece5a3664b5fd81ad0244ed3b5d3	d__Bacteria	p__Bacteroidota	c__Bacteroidia	o__Bacteroidales	f__Prevotellaceae	g__Prevotella	s__Prevotella_pallens	anaerobe	10	6	52
377bf1b86dd15d576b1b9edd617843ce	d__Bacteria	p__Bacteroidota	c__Bacteroidia	o__Bacteroidales	f__Prevotellaceae	g__Prevotella	s__Prevotella_shahii	anaerobe	3		15
a2cec0e8d7fe26f1b4376f3692c2c51e	d__Bacteria	p__Firmicutes	c__Clostridia	o__Lachnospirales	f__Lachnospiraceae	g__Catonella	s__uncultured_bacterium	anaerobe	10	7	38
aa0df0b066bbe1038a844179c7e82e1a	d__Bacteria	p__Campilobacterota	c__Campylobacteria	o__Campylobacterales	f__Campylobacteraceae	g__Campylobacter		aerobe	4	5	28
a65c4bb7defa88d3127ff6ce4cae80b7	d__Bacteria	p__Firmicutes	c__Bacilli	o__Mycoplasmatales	f__Mycoplasmataceae	g__Mycoplasma	s__Metamycoplasma_salivarium	aerobe	7	1	7
2df371c65a7a3622b70415bd07c4081f	d__Bacteria	p__Firmicutes	c__Clostridia	o__Lachnospirales	f__Lachnospiraceae	g__Oribacterium		anaerobe	52	1	8
5c8ab304c9598e43323adcc4607c798a	d__Bacteria	p__Actinobacteriota	c__Coriobacteriia	o__Coriobacteriales	f__Atopobiaceae	g__Atopobium		facultative anaerobe	6	4	32
5986b4931422d5a41f019155a60a89f4	d__Bacteria	p__Bacteroidota	c__Bacteroidia	o__Flavobacteriales	f__Flavobacteriaceae	g__Capnocytophaga	s__Capnocytophaga_sp.	facultative anaerobe	5	59	48
09f9294499192d4eecf29e85501cc425	d__Bacteria	p__Bacteroidota	c__Bacteroidia	o__Flavobacteriales	f__Weeksellaceae	g__Bergeyella		aerobe	16	58	70
2c79c63cbe2431fb26273878631cf564	d__Bacteria	p__Bacteroidota	c__Bacteroidia	o__Bacteroidales	f__Porphyromonadaceae	g__Porphyromonas	s__Porphyromonas_catoniae	anaerobe		18	19
5737e058385a6a34a3bcfdec9f73df47	d__Bacteria	p__Proteobacteria	c__Gammaproteobacteria	o__Cardiobacteriales	f__Cardiobacteriaceae	g__Cardiobacterium	s__uncultured_bacterium	facultative anaerobe	1		1
814d36cce47414becceb7665900831e6	d__Bacteria	p__Fusobacteriota	c__Fusobacteriia	o__Fusobacteriales	f__Leptotrichiaceae	g__Leptotrichia	s__uncultured_bacterium	anaerobe		20	45
ca070986833cb76ab84070eb40df1975	d__Bacteria	p__Fusobacteriota	c__Fusobacteriia	o__Fusobacteriales	f__Leptotrichiaceae	g__Leptotrichia	s__uncultured_bacterium	anaerobe	1		18
def5b6d8524e4fc6941620c712f1074d	d__Bacteria	p__Bacteroidota	c__Bacteroidia	o__Bacteroidales	f__Prevotellaceae	g__Prevotella	s__Prevotella_nanceiensis	anaerobe	13	8	72
6be9159335eaf8fa99434fec1f32d847	d__Bacteria	p__Campilobacterota	c__Campylobacteria	o__Campylobacterales	f__Campylobacteraceae	g__Campylobacter	s__Campylobacter_concisus	aerobe			1
02df8598ac39f1ef54609afb19c8c450	d__Bacteria	p__Firmicutes	c__Bacilli	o__Lactobacillales	f__Streptococcaceae	g__Streptococcus		facultative anaerobe	32	2	1
8048c6d48b7eb0a432dc4aa28e73ecce	d__Bacteria	p__Proteobacteria	c__Gammaproteobacteria	o__Burkholderiales	f__Neisseriaceae			aerobe	14	5	2
8e80ec2ce7273253b1e98358d64aef04	d__Bacteria	p__Proteobacteria	c__Gammaproteobacteria	o__Pseudomonadales	f__Moraxellaceae	g__Moraxella		aerobe		2	6
0a857f235b897d7c44e86f0c1b75c69b	d__Bacteria	p__Bacteroidota	c__Bacteroidia	o__Bacteroidales	f__Prevotellaceae	g__Alloprevotella	s__uncultured_Bacteroidetes	anaerobe	20	16	110
e708751e62639cc0951c413f92ea7620	d__Bacteria	p__Fusobacteriota	c__Fusobacteriia	o__Fusobacteriales	f__Fusobacteriaceae	g__Fusobacterium		anaerobe	12	41	26
c3a43e9dca56be145dbc08c893128e6f	d__Bacteria	p__Campilobacterota	c__Campylobacteria	o__Campylobacterales	f__Campylobacteraceae	g__Campylobacter		aerobe	2	3	17
1601abe13540e0b21db9d29476137c31	d__Bacteria	p__Bacteroidota	c__Bacteroidia	o__Bacteroidales	f__Prevotellaceae	g__Prevotella	s__unidentified_eubacterium	anaerobe	34	48	77
e9f080f863af4353091a04c94ff42294	d__Bacteria	p__Fusobacteriota	c__Fusobacteriia	o__Fusobacteriales	f__Leptotrichiaceae	g__Leptotrichia	s__uncultured_bacterium	anaerobe	7	8	2
f1860fe716257bd5fd5c4c6a16cf3b95	d__Bacteria	p__Proteobacteria	c__Gammaproteobacteria	o__Burkholderiales	f__Neisseriaceae	g__Neisseria		aerobe		19	18
6cb8554bacf666885f13532fe255ae86	d__Bacteria	p__Firmicutes	c__Negativicutes	o__Veillonellales-Selenomonadales	f__Selenomonadaceae	g__Centipeda		anaerobe		1	7
8674dcf0cfe35939037fa9a5b986866f	d__Bacteria	p__Fusobacteriota	c__Fusobacteriia	o__Fusobacteriales	f__Fusobacteriaceae	g__Fusobacterium		anaerobe		4	30
93fec914068220be020251cc9c36396b	d__Bacteria	p__Fusobacteriota	c__Fusobacteriia	o__Fusobacteriales	f__Leptotrichiaceae	g__Leptotrichia	s__uncultured_bacterium	anaerobe	22		2
0a21726cd4952a96635576553da67787	d__Bacteria	p__Bacteroidota	c__Bacteroidia	o__Bacteroidales	f__Prevotellaceae	g__Alloprevotella		anaerobe		5	13
f117f249f9d1425f4ecfc792bd51c3f9	d__Bacteria	p__Firmicutes	c__Negativicutes	o__Veillonellales-Selenomonadales	f__Selenomonadaceae	g__Selenomonas		anaerobe	17	33	102
a7c367beef72574e1d66781545a0674a	d__Bacteria	p__Firmicutes	c__Negativicutes	o__Veillonellales-Selenomonadales	f__Selenomonadaceae	g__Centipeda		anaerobe		1	6
f0140aec257756213c446d6d7c286873	d__Bacteria	p__Firmicutes	c__Negativicutes	o__Veillonellales-Selenomonadales	f__Selenomonadaceae			anaerobe	1		7
0232b56c81bb04fb94bdcfdf8b073ae1	d__Bacteria	p__Bacteroidota	c__Bacteroidia	o__Bacteroidales	f__Porphyromonadaceae	g__Porphyromonas	s__unidentified	anaerobe	35	20	67
70dbac76545ca7f0d29e40f47caf5706	d__Bacteria	p__Bacteroidota	c__Bacteroidia	o__Bacteroidales	f__Prevotellaceae	g__Alloprevotella	s__Alloprevotella_tannerae	anaerobe	3	5	33
3c7228b66038b74285cde6a69d28a4bd	d__Bacteria	p__Bacteroidota	c__Bacteroidia	o__Bacteroidales	f__Prevotellaceae	g__Alloprevotella	s__Alloprevotella_tannerae	anaerobe	8	7	58
7f85ac088481e3811666998c6ba22231	d__Bacteria	p__Fusobacteriota	c__Fusobacteriia	o__Fusobacteriales	f__Fusobacteriaceae	g__Fusobacterium	s__Fusobacterium_nucleatum	anaerobe	4	1	26
47c469260642c23db64dfd023310b421	d__Bacteria	p__Bacteroidota	c__Bacteroidia	o__Flavobacteriales	f__Flavobacteriaceae	g__Capnocytophaga		facultative anaerobe	1		8
f992dfdf7e8ebde2cd041f7e4100beff	d__Bacteria	p__Firmicutes	c__Clostridia	o__Lachnospirales	f__Lachnospiraceae	g__Oribacterium		anaerobe	11	1	17
651895d0c2c7a66a35b3a6a7d2ee15e5	d__Bacteria	p__Firmicutes	c__Negativicutes	o__Veillonellales-Selenomonadales	f__Veillonellaceae	g__Veillonella		anaerobe	5	44	67
712f610d95151fd7db44bd3a13e3ad15	d__Bacteria	p__Bacteroidota	c__Bacteroidia	o__Bacteroidales	f__Prevotellaceae	g__Prevotella	s__Prevotella_melaninogenica	anaerobe	1	1	16
ff59f10bbc0b61796030b91d25ebebcd	d__Bacteria	p__Bacteroidota	c__Bacteroidia	o__Bacteroidales	f__Prevotellaceae	g__Alloprevotella	s__Alloprevotella_rava	anaerobe	1	2	13
b0f5209ef3b4eba6f0348affcacd5862	d__Bacteria	p__Firmicutes	c__Clostridia	o__Lachnospirales	f__Lachnospiraceae	g__Catonella		anaerobe		1	6
426a58d7fde254d8ff01fac25e36ff0e	d__Bacteria	p__Bacteroidota	c__Bacteroidia	o__Bacteroidales	f__Prevotellaceae	g__Alloprevotella	s__uncultured_Bacteroidetes	anaerobe		3	16
8d798956f80af7113da08ece309fd8a4	d__Bacteria	p__Bacteroidota	c__Bacteroidia	o__Flavobacteriales	f__Flavobacteriaceae	g__Capnocytophaga		facultative anaerobe	16		2
dcb780205dff9735d08f1a23c93470cf	d__Bacteria	p__Firmicutes	c__Negativicutes	o__Veillonellales-Selenomonadales	f__Selenomonadaceae	g__Selenomonas	s__Selenomonas_sputigena	anaerobe	17	2	79
77a920bd965da12d31f93c1adf2c5ea1	d__Bacteria	p__Actinobacteriota	c__Actinobacteria	o__Corynebacteriales	f__Corynebacteriaceae	g__Corynebacterium		facultative anaerobe	2		11
e760971780dcb309a237f68058c31e6d	d__Bacteria	p__Firmicutes	c__Clostridia	o__Clostridia_UCG-014	f__Clostridia_UCG-014	g__Clostridia_UCG-014		anaerobe			4
cb7b110627b75c179449ecb70f8bc8d0	d__Bacteria	p__Bacteroidota	c__Bacteroidia	o__Bacteroidales	f__Prevotellaceae	g__Prevotella	s__Prevotella_veroralis	anaerobe	2	1	9
2b869347e522205f1c4a919196e6b45b	d__Bacteria	p__Fusobacteriota	c__Fusobacteriia	o__Fusobacteriales	f__Leptotrichiaceae	g__Leptotrichia	s__Leptotrichia_sp.	anaerobe	2	1	29
09ba0dcc9d08747a09b3a4ec08c8d529	d__Bacteria	p__Firmicutes	c__Clostridia	o__Peptostreptococcales-Tissierellales	f__Anaerovoracaceae	g__[Eubacterium]_brachy_group	s__Eubacterium_brachy	anaerobe	11	4	39
7e87735c204e7966d544fda276496db7	d__Bacteria	p__Firmicutes	c__Clostridia	o__Lachnospirales	f__Lachnospiraceae	g__Stomatobaculum	s__uncultured_bacterium	anaerobe	50	15	80
184e36e73aea65ae969879632f3644b2	d__Bacteria	p__Bacteroidota	c__Bacteroidia	o__Bacteroidales	f__Prevotellaceae	g__Prevotella	s__Prevotella_sp.	anaerobe	15	120	103
ba430d5e27861988066538a27c3742d0	d__Bacteria	p__Fusobacteriota	c__Fusobacteriia	o__Fusobacteriales	f__Leptotrichiaceae	g__Leptotrichia	s__Leptotrichia_sp.	anaerobe			13
5d047879489ed3ab2b46680099f20df7	d__Bacteria	p__Fusobacteriota	c__Fusobacteriia	o__Fusobacteriales	f__Fusobacteriaceae	g__Fusobacterium		anaerobe		5	3
fa3c3f5a8c4f5834f1afb42cd4e8e977	d__Bacteria	p__Firmicutes	c__Clostridia	o__Lachnospirales	f__Lachnospiraceae	g__Stomatobaculum	s__uncultured_bacterium	anaerobe	1		18
97a46f61e3a58fd7a24456794f6e3a8b	d__Bacteria	p__Actinobacteriota	c__Actinobacteria	o__Actinomycetales	f__Actinomycetaceae	g__Actinomyces		facultative anaerobe	1		4
213bf13dcb40a070300b6c5ff8866991	d__Bacteria	p__Firmicutes	c__Negativicutes	o__Veillonellales-Selenomonadales	f__Veillonellaceae	g__Veillonella		anaerobe	4	4	26
fc504f21e7e25f5da61e91d818fd28cf	d__Bacteria	p__Bacteroidota	c__Bacteroidia	o__Bacteroidales	f__Prevotellaceae	g__Prevotella		anaerobe	26	3	61
df2a0360b1740dd4524b1e1163302333	d__Bacteria	p__Campilobacterota	c__Campylobacteria	o__Campylobacterales	f__Campylobacteraceae	g__Campylobacter		aerobe			4
3b555da08913fea286bf7eab94fc690d	d__Bacteria	p__Firmicutes	c__Negativicutes	o__Veillonellales-Selenomonadales	f__Selenomonadaceae	g__Centipeda		anaerobe	6		33
ca6e8c9e4b092b9e0eb5f3cb54ffe8fc	d__Bacteria	p__Proteobacteria	c__Gammaproteobacteria	o__Burkholderiales	f__Neisseriaceae	g__Neisseria		aerobe			1
acada4bafd50faf178bb77dd706705f6	d__Bacteria	p__Bacteroidota	c__Bacteroidia	o__Bacteroidales	f__Prevotellaceae	g__Prevotella	s__Prevotella_salivae	anaerobe			21
7c4e31f3bc28a5ce629d83c91faeea38	d__Bacteria	p__Firmicutes	c__Clostridia	o__Lachnospirales	f__Lachnospiraceae	g__Shuttleworthia	s__Shuttleworthia_satelles	anaerobe	6	10	15
f94e35f3a72a7eda2bd9cc0703494476	d__Bacteria	p__Spirochaetota	c__Spirochaetia	o__Spirochaetales	f__Spirochaetaceae	g__Treponema	s__Treponema_medium	unknown	7		33
3999d3d48d6c25388670cfd06f792d79	d__Bacteria	p__Bacteroidota	c__Bacteroidia	o__Bacteroidales	f__Prevotellaceae	g__Prevotella	s__Prevotella_salivae	anaerobe			2
c1ad866ca4cc57cefffbfdb11f5388b8	d__Bacteria	p__Proteobacteria	c__Gammaproteobacteria	o__Pasteurellales	f__Pasteurellaceae	g__Haemophilus		facultative anaerobe			8
69b739268f7af53def19205e22b2ce88	d__Bacteria	p__Bacteroidota	c__Bacteroidia	o__Bacteroidales	f__Prevotellaceae	g__Prevotella	s__Prevotella_salivae	anaerobe			1
2ba6fd42d2747428cad67ec783b4131d	d__Bacteria	p__Spirochaetota	c__Spirochaetia	o__Spirochaetales	f__Spirochaetaceae	g__Treponema	s__Treponema_socranskii	unknown	2		17
ee81b2bfaff2d3edef79b82d58742826	d__Bacteria	p__Bacteroidota	c__Bacteroidia	o__Bacteroidales	f__Prevotellaceae	g__Prevotella	s__Prevotella_melaninogenica	anaerobe	6	53	70
893163595b030990d4be44b1b1a68de9	d__Bacteria	p__Bacteroidota	c__Bacteroidia	o__Bacteroidales	f__Prevotellaceae	g__Prevotella	s__Prevotella_loescheii	anaerobe	2	7	34
658d8903938ce4af1833f5be9f82ac23	d__Bacteria	p__Fusobacteriota	c__Fusobacteriia	o__Fusobacteriales	f__Fusobacteriaceae	g__Fusobacterium		anaerobe			4
09f80033bb3d7fad91bf9e782dae224f	d__Bacteria	p__Fusobacteriota	c__Fusobacteriia	o__Fusobacteriales	f__Fusobacteriaceae	g__Fusobacterium		anaerobe	2		12
e6d61f3bef87ae8371054a750ee868b2	d__Bacteria	p__Firmicutes	c__Negativicutes	o__Veillonellales-Selenomonadales	f__Selenomonadaceae	g__Centipeda	s__uncultured_bacterium	anaerobe	5		18
ed4dddec0fe121e8eb5872d6fe067732	d__Bacteria	p__Spirochaetota	c__Spirochaetia	o__Spirochaetales	f__Spirochaetaceae	g__Treponema	s__Treponema_maltophilum	unknown	4	1	35
9b84c28457b400b5694dd08547a42e61	d__Bacteria	p__Bacteroidota	c__Bacteroidia	o__Bacteroidales	f__Tannerellaceae	g__Tannerella	s__Tannerella_forsythia	anaerobe	10	1	17
9249604f1a454b67caf515b49cb5bf43	d__Bacteria	p__Fusobacteriota	c__Fusobacteriia	o__Fusobacteriales	f__Fusobacteriaceae	g__Fusobacterium		anaerobe	1		15
1f1b29c3e38498cfc7763f05ce2ccd64	d__Bacteria	p__Fusobacteriota	c__Fusobacteriia	o__Fusobacteriales	f__Leptotrichiaceae	g__Leptotrichia	s__uncultured_bacterium	anaerobe	2		14
652eb9b25b317141cbf0d4508ed95e63	d__Bacteria	p__Firmicutes	c__Negativicutes	o__Veillonellales-Selenomonadales	f__Selenomonadaceae	g__Centipeda	s__uncultured_bacterium	anaerobe			2
83c65c33f55a718471f4a66250aedc03	d__Bacteria	p__Bacteroidota	c__Bacteroidia	o__Bacteroidales	f__Prevotellaceae	g__Prevotella	s__Prevotella_oulorum	anaerobe	2		19
f8e51c44d78e3db100fe95c9d171c5fc	d__Bacteria	p__Firmicutes	c__Clostridia	o__Lachnospirales	f__Lachnospiraceae	g__Stomatobaculum	s__uncultured_bacterium	anaerobe	9	5	13
d76e72a880b4e5fd81deb0e3dcb3c1cb	d__Bacteria	p__Spirochaetota	c__Spirochaetia	o__Spirochaetales	f__Spirochaetaceae	g__Treponema	s__Treponema_vincentii	unknown	1	1	19
94451b926d79f4c13eba64d580d5154f	d__Bacteria	p__Firmicutes	c__Negativicutes	o__Veillonellales-Selenomonadales	f__Veillonellaceae	g__Dialister		anaerobe	4		20
563faac64608ddfca54f03cdd5dfaf3f	d__Bacteria	p__Firmicutes	c__Clostridia	o__Lachnospirales	f__Lachnospiraceae	g__Oribacterium	s__uncultured_organism	anaerobe			8
fee97629f051de0199ea8aab1752f501	d__Bacteria	p__Actinobacteriota	c__Coriobacteriia	o__Coriobacteriales	f__Atopobiaceae	g__Atopobium	s__uncultured_bacterium	facultative anaerobe	1		3
3dad5406a1fa2c06e03364dbf3c4402b	d__Bacteria	p__Fusobacteriota	c__Fusobacteriia	o__Fusobacteriales	f__Fusobacteriaceae	g__Fusobacterium	s__Fusobacterium_nucleatum	anaerobe	1		11
bb51fadf084421bbb1a59905985c201a	d__Bacteria	p__Synergistota	c__Synergistia	o__Synergistales	f__Synergistaceae	g__Fretibacterium		anaerobe			5
ca321922be56e7682cce9b8eeec198aa	d__Bacteria	p__Firmicutes	c__Negativicutes	o__Veillonellales-Selenomonadales	f__Selenomonadaceae	g__Selenomonas	s__Veillonellaceae_bacterium	anaerobe	1		17
c534548ccace1ea014bf16387ce349ab	d__Bacteria	p__Firmicutes	c__Clostridia	o__Peptostreptococcales-Tissierellales	f__Peptostreptococcaceae	g__[Eubacterium]_yurii_group	s__uncultured_bacterium	anaerobe	4		1
e31678836ca29c0ebde1bd1003bcdca6	d__Bacteria	p__Actinobacteriota	c__Actinobacteria	o__Actinomycetales	f__Actinomycetaceae	g__Actinomyces		facultative anaerobe			3
1f39fdd074ccf0c0ea5138041d08d2e9	d__Bacteria	p__Firmicutes	c__Clostridia	o__Lachnospirales	f__Lachnospiraceae	g__Shuttleworthia	s__Shuttleworthia_satelles	anaerobe	1	3	7
8e9e41ad7e5a60d18c633485baa62678	d__Bacteria	p__Firmicutes	c__Negativicutes	o__Veillonellales-Selenomonadales	f__Selenomonadaceae	g__Selenomonas		anaerobe			5
cebdc634b55118893d79da202de73b6c	d__Bacteria	p__Fusobacteriota	c__Fusobacteriia	o__Fusobacteriales	f__Leptotrichiaceae	g__Leptotrichia	s__Leptotrichia_sp.	anaerobe			11
b332b9a4d638a1f226e57c94a40f1450	d__Bacteria	p__Firmicutes	c__Clostridia	o__Peptostreptococcales-Tissierellales	f__Anaerovoracaceae	g__[Eubacterium]_nodatum_group	s__[Eubacterium]_infirmum	anaerobe			3
7522487bf3859050b2ce974cf1060ffb	d__Bacteria	p__Spirochaetota	c__Spirochaetia	o__Spirochaetales	f__Spirochaetaceae	g__Treponema	s__Treponema_socranskii	unknown		1	11
52d998a538496179968dec55950d1516	d__Bacteria	p__Proteobacteria	c__Gammaproteobacteria	o__Burkholderiales	f__Neisseriaceae	g__Eikenella		aerobe	22		2
ace7b08a7796148828d0357e86ee4ac8	d__Bacteria	p__Bacteroidota	c__Bacteroidia	o__Bacteroidales	f__Prevotellaceae	g__Prevotella		anaerobe	4		1
e6c810f04e3cb9a3908b946c5ab85e86	d__Bacteria	p__Firmicutes	c__Negativicutes	o__Veillonellales-Selenomonadales	f__Veillonellaceae	g__Veillonella		anaerobe	4
476f23054aadc5156eae036c2c5e73af	d__Bacteria	p__Bacteroidota	c__Bacteroidia	o__Bacteroidales	f__Prevotellaceae	g__Prevotella	s__Prevotella_melaninogenica	anaerobe	42		2
5dcf0b75ca974467170dd7739ec289eb	d__Bacteria	p__Bacteroidota	c__Bacteroidia	o__Flavobacteriales	f__Weeksellaceae	g__Bergeyella		aerobe	21		2
59e9aa2569a0b35de27f4468b97b99cd	d__Bacteria	p__Proteobacteria	c__Gammaproteobacteria	o__Pseudomonadales	f__Pseudomonadaceae	g__Pseudomonas		pathogen	1
350e2ca44f40ce7ba455c4463730785e	d__Archaea	p__Euryarchaeota	c__Methanobacteria	o__Methanobacteriales	f__Methanobacteriaceae	g__Methanobacterium	s__uncultured_Methanobacteriaceae	anaerobe	1
da6de4baf5c0fc64a820af6259148191	d__Bacteria	p__Firmicutes	c__Bacilli	o__Lactobacillales	f__Streptococcaceae	g__Streptococcus		facultative anaerobe	1
5a2e42177ddd0fd0ac60765af28c9a27	d__Bacteria	p__Fusobacteriota	c__Fusobacteriia	o__Fusobacteriales	f__Fusobacteriaceae	g__Fusobacterium		anaerobe	4		2
f911ef9948ed9417792816f5ff6b7c59	d__Bacteria	p__Firmicutes	c__Bacilli	o__Staphylococcales	f__Staphylococcaceae	g__Staphylococcus		pathogen	1
773538fec13fab1cbb6060f464270a4d	d__Bacteria	p__Firmicutes	c__Bacilli	o__Staphylococcales	f__Staphylococcaceae	g__Staphylococcus		pathogen	1
