# Supplementary material for: Microbial community organization designates distinct pulmonary exacerbation types and predicts treatment outcome in cystic fibrosis
Source: Research Square preprint supplement (doi:10.21203/rs.3.rs-4128740/v1), 2024-03-21
Supplement: Supplementary file 2 [file 646b4a0d42c759cf9fd6cb5d.xlsx]

## Sheet: Sheet1
sample_name	SRA BioSample	NCBI BioProject	Unique_subjectID	ECid	Agegroup	BETRU	Sex	CFTR_Genotype	SampleDay2T	CF2N	CFTRgroup	F508Zygosity	DMM	CFdomRelAb	Shannon	Chao1	Agegroup	class	classN	D23	K3	PExClust
A001	SAMN35882923	PRJNA987026	A	1	38-52	Baseline	F	^F508 / N1303K	57	76.6923	G3	heterozygous	1	0.967805	0.194984	7	38-52	56-60	12	24-60	PAT	PAT
A002	SAMN35882924	PRJNA987026	A	1	38-52	Baseline	F	^F508 / N1303K	56	340	G3	heterozygous	1	0.972683	0.141389	4	38-52	56-60	12	24-60	AN1	PAT
A003	SAMN35882925	PRJNA987026	A	1	38-52	Baseline	F	^F508 / N1303K	55	3.51942	G3	heterozygous	3	0.69561	1.1556	15.25	38-52	51-55	11	24-60	PAT	PAT
A004	SAMN35882926	PRJNA987026	A	1	38-52	Baseline	F	^F508 / N1303K	51	6.90476	G3	heterozygous	3	0.834146	0.755136	11	38-52	51-55	11	24-60	PAT	PAT
A005	SAMN35882927	PRJNA987026	A	1	38-52	Baseline	F	^F508 / N1303K	46	4.7191	G3	heterozygous	1	0.804878	0.730486	8	38-52	46-50	10	24-60	PAT	PAT
A006	SAMN35882928	PRJNA987026	A	1	38-52	Baseline	F	^F508 / N1303K	45	55.7222	G3	heterozygous	1	0.954146	0.248811	7	38-52	41-45	9	24-60	PAT	PAT
A007	SAMN35882929	PRJNA987026	A	1	38-52	Baseline	F	^F508 / N1303K	44	3.43578	G3	heterozygous	3	0.720976	1.15791	14	38-52	41-45	9	24-60	PAT	PAT
A008	SAMN35882930	PRJNA987026	A	1	38-52	Baseline	F	^F508 / N1303K	42	0.95625	G3	heterozygous	5	0.443902	1.52452	15.5	38-52	41-45	9	24-60	AN1	PAT
A009	SAMN35882931	PRJNA987026	A	1	38-52	Baseline	F	^F508 / N1303K	41	3.23849	G3	heterozygous	3	0.741463	0.846915	7	38-52	41-45	9	24-60	PAT	PAT
A010	SAMN35882932	PRJNA987026	A	1	38-52	Baseline	F	^F508 / N1303K	37	126.75	G3	heterozygous	1	0.933659	0.28411	5	38-52	36-40	8	24-60	PAT	PAT
A011	SAMN35882933	PRJNA987026	A	1	38-52	Baseline	F	^F508 / N1303K	36	55.9444	G3	heterozygous	1	0.961951	0.200017	4	38-52	36-40	8	24-60	PAT	PAT
A012	SAMN35882934	PRJNA987026	A	1	38-52	Baseline	F	^F508 / N1303K	35	2.05556	G3	heterozygous	3	0.632195	1.20809	11	38-52	31-35	7	24-60	PAT	PAT
A013	SAMN35882935	PRJNA987026	A	1	38-52	Baseline	F	^F508 / N1303K	34	17.3036	G3	heterozygous	1	0.925854	0.352209	5	38-52	31-35	7	24-60	PAT	PAT
A014	SAMN35882936	PRJNA987026	A	1	38-52	Baseline	F	^F508 / N1303K	33	13.6429	G3	heterozygous	1	0.899512	0.436065	4	38-52	31-35	7	24-60	PAT	PAT
A015	SAMN35882937	PRJNA987026	A	1	38-52	Baseline	F	^F508 / N1303K	32	112.889	G3	heterozygous	1	0.948293	0.240596	5	38-52	31-35	7	24-60	PAT	PAT
A016	SAMN35882938	PRJNA987026	A	1	38-52	Baseline	F	^F508 / N1303K	31	1.97633	G3	heterozygous	3	0.646829	1.08182	12	38-52	31-35	7	24-60	PAT	PAT
A017	SAMN35882939	PRJNA987026	A	1	38-52	Baseline	F	^F508 / N1303K	30	255.25	G3	heterozygous	1	0.941463	0.237259	3	38-52	26-30	6	24-60	AN1	PAT
A018	SAMN35882940	PRJNA987026	A	1	38-52	Baseline	F	^F508 / N1303K	29	83.9167	G3	heterozygous	1	0.945366	0.265377	5	38-52	26-30	6	24-60	PAT	PAT
A019	SAMN35882941	PRJNA987026	A	1	38-52	Baseline	F	^F508 / N1303K	28	10.4607	G3	heterozygous	1	0.903415	0.445969	9	38-52	26-30	6	24-60	PAT	PAT
A020	SAMN35882942	PRJNA987026	A	1	38-52	Baseline	F	^F508 / N1303K	27	3.28696	G3	heterozygous	3	0.731707	0.975582	10	38-52	26-30	6	24-60	PAT	PAT
A021	SAMN35882943	PRJNA987026	A	1	38-52	Baseline	F	^F508 / N1303K	24	16.3729	G3	heterozygous	1	0.865366	0.526696	4	38-52	21-25	5	24-60	PAT	PAT
A022	SAMN35882944	PRJNA987026	A	1	38-52	Baseline	F	^F508 / N1303K	22	63.3333	G3	heterozygous	1	0.915122	0.379254	6	38-52	21-25	5	<24	PAT	PAT
A023	SAMN35882945	PRJNA987026	A	1	38-52	Baseline	F	^F508 / N1303K	21	9.23	G3	heterozygous	1	0.878049	0.504654	5	38-52	21-25	5	<24	PAT	PAT
A024	SAMN35882946	PRJNA987026	A	1	38-52	Baseline	F	^F508 / N1303K	20	1024	G3	heterozygous	1	0.931707	0.264498	8	38-52	16-20	4	<24	AN1	PAT
A025	SAMN35882947	PRJNA987026	A	1	38-52	Baseline	F	^F508 / N1303K	19	58.8824	G3	heterozygous	1	0.971707	0.18242	11	38-52	16-20	4	<24	PAT	PAT
A026	SAMN35882948	PRJNA987026	A	1	38-52	Baseline	F	^F508 / N1303K	18	2.40484	G3	heterozygous	3	0.678049	0.944243	6	38-52	16-20	4	<24	PAT	PAT
A027	SAMN35882949	PRJNA987026	A	1	38-52	Baseline	F	^F508 / N1303K	17	8.3578	G3	heterozygous	1	0.880976	0.487573	6	38-52	16-20	4	<24	PAT	PAT
A028	SAMN35882950	PRJNA987026	A	1	38-52	Baseline	F	^F508 / N1303K	16	4.14646	G3	heterozygous	1	0.792195	0.725681	13.5	38-52	16-20	4	<24	PAT	PAT
A029	SAMN35882951	PRJNA987026	A	1	38-52	Baseline	F	^F508 / N1303K	15	11.55	G3	heterozygous	1	0.886829	0.570216	9	38-52	11-15	3	<24	PAT	PAT
A030	SAMN35882952	PRJNA987026	A	1	38-52	Exacerbation	F	^F508 / N1303K	14	12.141	G3	heterozygous	1	0.907317	0.403378	4	38-52	11-15	3	<24	PAT	PAT
A031	SAMN35882953	PRJNA987026	A	1	38-52	Exacerbation	F	^F508 / N1303K	13	45.5	G3	heterozygous	1	0.960976	0.214445	6	38-52	11-15	3	<24	PAT	PAT
A032	SAMN35882954	PRJNA987026	A	1	38-52	Exacerbation	F	^F508 / N1303K	12	1024	G3	heterozygous	1	0.987317	0.0747924	5	38-52	11-15	3	<24	AN1	PAT
A033	SAMN35882955	PRJNA987026	A	1	38-52	Exacerbation	F	^F508 / N1303K	11	71.7143	G3	heterozygous	1	0.969756	0.17883	6	38-52	11-15	3	<24	PAT	PAT
A034	SAMN35882956	PRJNA987026	A	1	38-52	Exacerbation	F	^F508 / N1303K	10	49.75	G3	heterozygous	1	0.955122	0.255377	10	38-52	6-10	2	<24	PAT	PAT
A035	SAMN35882957	PRJNA987026	A	1	38-52	Exacerbation	F	^F508 / N1303K	8	1.12083	G3	heterozygous	3	0.523902	1.03899	11.25	38-52	6-10	2	<24	PAT	PAT
A036	SAMN35882958	PRJNA987026	A	1	38-52	Exacerbation	F	^F508 / N1303K	7	41.4583	G3	heterozygous	1	0.959024	0.22501	8	38-52	6-10	2	<24	PAT	PAT
A037	SAMN35882959	PRJNA987026	A	1	38-52	Exacerbation	F	^F508 / N1303K	6	3.51121	G3	heterozygous	3	0.753171	0.808287	7.5	38-52	6-10	2	<24	PAT	PAT
A038	SAMN35882960	PRJNA987026	A	1	38-52	Exacerbation	F	^F508 / N1303K	5	255.25	G3	heterozygous	1	0.99122	0.0563513	3	38-52	1-5	1	<24	AN1	PAT
A039	SAMN35882961	PRJNA987026	A	1	38-52	Exacerbation	F	^F508 / N1303K	2	5.20859	G3	heterozygous	3	0.818537	0.663292	8.5	38-52	1-5	1	<24	PAT	PAT
A040	SAMN35882962	PRJNA987026	A	1	38-52	Exacerbation	F	^F508 / N1303K	1	17.0943	G3	heterozygous	3	0.883902	0.523255	12	38-52	1-5	1	<24	PAT	PAT
A041	SAMN35882963	PRJNA987026	A	2	38-52	Baseline	F	^F508 / N1303K	59	0.454248	G3	heterozygous	5	0.27122	1.6078	12	38-52	56-60	12	24-60	AN1	PAT
A042	SAMN35882964	PRJNA987026	A	2	38-52	Baseline	F	^F508 / N1303K	58	1.26034	G3	heterozygous	3	0.505366	1.3966	11	38-52	56-60	12	24-60	PAT	PAT
A043	SAMN35882965	PRJNA987026	A	2	38-52	Baseline	F	^F508 / N1303K	57	0.717082	G3	heterozygous	3	0.393171	1.35135	11	38-52	56-60	12	24-60	PAT	PAT
A044	SAMN35882966	PRJNA987026	A	2	38-52	Baseline	F	^F508 / N1303K	52	12.7297	G3	heterozygous	1	0.919024	0.392913	8.25	38-52	51-55	11	24-60	PAT	PAT
A045	SAMN35882967	PRJNA987026	A	2	38-52	Baseline	F	^F508 / N1303K	51	0.174252	G3	heterozygous	5	0.130732	1.77453	15	38-52	51-55	11	24-60	AN1	PAT
A046	SAMN35882968	PRJNA987026	A	2	38-52	Baseline	F	^F508 / N1303K	50	2.23101	G3	heterozygous	1	0.687805	0.885045	5	38-52	46-50	10	24-60	PAT	PAT
A047	SAMN35882969	PRJNA987026	A	2	38-52	Baseline	F	^F508 / N1303K	47	15.3934	G3	heterozygous	1	0.916098	0.386813	7	38-52	46-50	10	24-60	PAT	PAT
A048	SAMN35882970	PRJNA987026	A	2	38-52	Baseline	F	^F508 / N1303K	46	1.40828	G3	heterozygous	3	0.46439	1.69527	14	38-52	46-50	10	24-60	PAT	PAT
A049	SAMN35882971	PRJNA987026	A	2	38-52	Baseline	F	^F508 / N1303K	45	4.7	G3	heterozygous	1	0.779512	0.796474	5	38-52	41-45	9	24-60	PAT	PAT
A050	SAMN35882972	PRJNA987026	A	2	38-52	Baseline	F	^F508 / N1303K	42	1.33846	G3	heterozygous	3	0.509268	1.55242	13	38-52	41-45	9	24-60	PAT	PAT
A051	SAMN35882973	PRJNA987026	A	2	38-52	Baseline	F	^F508 / N1303K	41	1.38346	G3	heterozygous	3	0.538537	1.31874	10	38-52	41-45	9	24-60	PAT	PAT
A052	SAMN35882974	PRJNA987026	A	2	38-52	Baseline	F	^F508 / N1303K	37	22.2558	G3	heterozygous	1	0.933659	0.356878	8	38-52	36-40	8	24-60	PAT	PAT
A053	SAMN35882975	PRJNA987026	A	2	38-52	Baseline	F	^F508 / N1303K	36	1.09195	G3	heterozygous	3	0.463415	1.40633	9	38-52	36-40	8	24-60	PAT	PAT
A054	SAMN35882976	PRJNA987026	A	2	38-52	Baseline	F	^F508 / N1303K	35	70.2857	G3	heterozygous	1	0.96	0.22003	8	38-52	31-35	7	24-60	PAT	PAT
A055	SAMN35882977	PRJNA987026	A	2	38-52	Baseline	F	^F508 / N1303K	34	0.780632	G3	heterozygous	3	0.385366	1.59375	15.25	38-52	31-35	7	24-60	PAT	PAT
A056	SAMN35882978	PRJNA987026	A	2	38-52	Baseline	F	^F508 / N1303K	33	1.16268	G3	heterozygous	3	0.474146	1.69622	19	38-52	31-35	7	24-60	PAT	PAT
A057	SAMN35882979	PRJNA987026	A	2	38-52	Baseline	F	^F508 / N1303K	32	0.518182	G3	heterozygous	5	0.278049	1.72314	15.25	38-52	31-35	7	24-60	AN1	PAT
A058	SAMN35882980	PRJNA987026	A	2	38-52	Baseline	F	^F508 / N1303K	31	21.6	G3	heterozygous	1	0.948293	0.26095	5	38-52	31-35	7	24-60	PAT	PAT
A059	SAMN35882981	PRJNA987026	A	2	38-52	Baseline	F	^F508 / N1303K	30	0.273148	G3	heterozygous	5	0.172683	1.6787	15	38-52	26-30	6	24-60	AN1	PAT
A060	SAMN35882982	PRJNA987026	A	2	38-52	Baseline	F	^F508 / N1303K	29	7.75	G3	heterozygous	1	0.877073	0.491692	6.5	38-52	26-30	6	24-60	PAT	PAT
A061	SAMN35882983	PRJNA987026	A	2	38-52	Baseline	F	^F508 / N1303K	28	5.77778	G3	heterozygous	1	0.811707	0.754976	10.25	38-52	26-30	6	24-60	PAT	PAT
A062	SAMN35882984	PRJNA987026	A	2	38-52	Baseline	F	^F508 / N1303K	25	29.8485	G3	heterozygous	1	0.960976	0.231806	7	38-52	21-25	5	24-60	PAT	PAT
A063	SAMN35882985	PRJNA987026	A	2	38-52	Baseline	F	^F508 / N1303K	22	5.75	G3	heterozygous	1	0.807805	0.770143	9.5	38-52	21-25	5	<24	PAT	PAT
A064	SAMN35882986	PRJNA987026	A	2	38-52	Baseline	F	^F508 / N1303K	21	16.8772	G3	heterozygous	1	0.938537	0.295265	11	38-52	21-25	5	<24	PAT	PAT
A065	SAMN35882987	PRJNA987026	A	2	38-52	Baseline	F	^F508 / N1303K	20	0.813433	G3	heterozygous	3	0.425366	1.27447	12	38-52	16-20	4	<24	PAT	PAT
A066	SAMN35882988	PRJNA987026	A	2	38-52	Baseline	F	^F508 / N1303K	17	0.951049	G3	heterozygous	3	0.398049	1.73397	16	38-52	16-20	4	<24	PAT	PAT
A067	SAMN35882989	PRJNA987026	A	2	38-52	Baseline	F	^F508 / N1303K	16	0.806818	G3	heterozygous	3	0.41561	1.37547	12	38-52	16-20	4	<24	PAT	PAT
A068	SAMN35882990	PRJNA987026	A	2	38-52	Baseline	F	^F508 / N1303K	15	17.54	G3	heterozygous	1	0.85561	0.676944	8	38-52	11-15	3	<24	PAT	PAT
A069	SAMN35882991	PRJNA987026	A	2	38-52	Exacerbation	F	^F508 / N1303K	14	6.33094	G3	heterozygous	1	0.858537	0.596713	8	38-52	11-15	3	<24	PAT	PAT
A070	SAMN35882992	PRJNA987026	A	2	38-52	Exacerbation	F	^F508 / N1303K	8	2.00321	G3	heterozygous	3	0.609756	1.26258	12	38-52	6-10	2	<24	PAT	PAT
A071	SAMN35882993	PRJNA987026	A	2	38-52	Exacerbation	F	^F508 / N1303K	7	19.3469	G3	heterozygous	1	0.924878	0.357558	5	38-52	6-10	2	<24	PAT	PAT
A072	SAMN35882994	PRJNA987026	A	2	38-52	Exacerbation	F	^F508 / N1303K	6	2.71642	G3	heterozygous	3	0.710244	0.949291	11.25	38-52	6-10	2	<24	PAT	PAT
A073	SAMN35882995	PRJNA987026	A	2	38-52	Exacerbation	F	^F508 / N1303K	5	20.6809	G3	heterozygous	1	0.948293	0.253546	4	38-52	1-5	1	<24	PAT	PAT
A074	SAMN35882996	PRJNA987026	A	2	38-52	Exacerbation	F	^F508 / N1303K	4	2.76894	G3	heterozygous	3	0.713171	0.946004	15.5	38-52	1-5	1	<24	PAT	PAT
A075	SAMN35882997	PRJNA987026	A	2	38-52	Exacerbation	F	^F508 / N1303K	3	4.62651	G3	heterozygous	3	0.749268	1.01297	13	38-52	1-5	1	<24	PAT	PAT
A076	SAMN35882998	PRJNA987026	A	2	38-52	Exacerbation	F	^F508 / N1303K	2	5.83673	G3	heterozygous	1	0.837073	0.649271	12	38-52	1-5	1	<24	PAT	PAT
A077	SAMN11251437	PRJNA520924	A	10	38-52	Baseline	F	^F508 / N1303K	59	66.6667	G3	heterozygous	1	0.97561	0.155058	7	38-52	56-60	12	24-60	PAT	PAT
A078	SAMN11251438	PRJNA520924	A	10	38-52	Baseline	F	^F508 / N1303K	58	62.625	G3	heterozygous	1	0.96878	0.177175	5	38-52	56-60	12	24-60	PAT	PAT
A079	SAMN11251439	PRJNA520924	A	10	38-52	Baseline	F	^F508 / N1303K	57	9.57609	G3	heterozygous	1	0.846829	0.650846	9	38-52	56-60	12	24-60	PAT	PAT
A080	SAMN11251440	PRJNA520924	A	10	38-52	Baseline	F	^F508 / N1303K	56	46.7619	G3	heterozygous	1	0.958049	0.230725	5	38-52	56-60	12	24-60	PAT	PAT
A081	SAMN11251441	PRJNA520924	A	10	38-52	Baseline	F	^F508 / N1303K	55	35.0357	G3	heterozygous	1	0.957073	0.227001	5	38-52	51-55	11	24-60	PAT	PAT
A082	SAMN11251442	PRJNA520924	A	10	38-52	Baseline	F	^F508 / N1303K	54	10.9036	G3	heterozygous	1	0.877073	0.557539	11	38-52	51-55	11	24-60	PAT	PAT
A083	SAMN11251443	PRJNA520924	A	10	38-52	Baseline	F	^F508 / N1303K	53	11.35	G3	heterozygous	1	0.883902	0.49898	7	38-52	51-55	11	24-60	PAT	PAT
A084	SAMN11251444	PRJNA520924	A	10	38-52	Baseline	F	^F508 / N1303K	52	9.37363	G3	heterozygous	3	0.827317	0.655119	8	38-52	51-55	11	24-60	PAT	PAT
A085	SAMN11251445	PRJNA520924	A	10	38-52	Baseline	F	^F508 / N1303K	51	18.0769	G3	heterozygous	1	0.914146	0.398047	7.5	38-52	51-55	11	24-60	PAT	PAT
A086	SAMN11251446	PRJNA520924	A	10	38-52	Baseline	F	^F508 / N1303K	50	13.4203	G3	heterozygous	1	0.896585	0.489464	7	38-52	46-50	10	24-60	PAT	PAT
A087	SAMN11251447	PRJNA520924	A	10	38-52	Baseline	F	^F508 / N1303K	49	22.0682	G3	heterozygous	1	0.92878	0.343013	7.5	38-52	46-50	10	24-60	PAT	PAT
A088	SAMN11251448	PRJNA520924	A	10	38-52	Baseline	F	^F508 / N1303K	48	112.667	G3	heterozygous	1	0.989268	0.0644257	3	38-52	46-50	10	24-60	PAT	PAT
A089	SAMN11251449	PRJNA520924	A	10	38-52	Baseline	F	^F508 / N1303K	47	37.4615	G3	heterozygous	1	0.943415	0.300118	7	38-52	46-50	10	24-60	PAT	PAT
A090	SAMN11251450	PRJNA520924	A	10	38-52	Baseline	F	^F508 / N1303K	46	24.05	G3	heterozygous	1	0.934634	0.338358	7	38-52	46-50	10	24-60	PAT	PAT
A091	SAMN11251451	PRJNA520924	A	10	38-52	Baseline	F	^F508 / N1303K	45	21	G3	heterozygous	1	0.938537	0.299145	7	38-52	41-45	9	24-60	PAT	PAT
A092	SAMN11251452	PRJNA520924	A	10	38-52	Baseline	F	^F508 / N1303K	44	25.0263	G3	heterozygous	1	0.927805	0.337126	5	38-52	41-45	9	24-60	PAT	PAT
A093	SAMN11251454	PRJNA520924	A	10	38-52	Baseline	F	^F508 / N1303K	41	22.5349	G3	heterozygous	1	0.945366	0.275844	5	38-52	41-45	9	24-60	PAT	PAT
A094	SAMN11251455	PRJNA520924	A	10	38-52	Baseline	F	^F508 / N1303K	40	12.3421	G3	heterozygous	1	0.906341	0.407063	7	38-52	36-40	8	24-60	PAT	PAT
A095	SAMN11251456	PRJNA520924	A	10	38-52	Baseline	F	^F508 / N1303K	39	8.89	G3	heterozygous	1	0.859512	0.611928	10.5	38-52	36-40	8	24-60	PAT	PAT
A096	SAMN11251457	PRJNA520924	A	10	38-52	Baseline	F	^F508 / N1303K	38	1020	G3	heterozygous	1	0.995122	0.033273	3	38-52	36-40	8	24-60	AN1	PAT
A097	SAMN11251458	PRJNA520924	A	10	38-52	Baseline	F	^F508 / N1303K	37	4.09424	G3	heterozygous	3	0.756098	0.917534	11	38-52	36-40	8	24-60	PAT	PAT
A098	SAMN11251459	PRJNA520924	A	10	38-52	Baseline	F	^F508 / N1303K	36	11.4691	G3	heterozygous	1	0.906341	0.358836	4	38-52	36-40	8	24-60	PAT	PAT
A099	SAMN11251460	PRJNA520924	A	10	38-52	Baseline	F	^F508 / N1303K	35	59.2353	G3	heterozygous	1	0.982439	0.0921565	3	38-52	31-35	7	24-60	PAT	PAT
A100	SAMN11251461	PRJNA520924	A	10	38-52	Baseline	F	^F508 / N1303K	34	10.9518	G3	heterozygous	1	0.883902	0.501778	7	38-52	31-35	7	24-60	PAT	PAT
A101	SAMN11251462	PRJNA520924	A	10	38-52	Baseline	F	^F508 / N1303K	33	20.587	G3	heterozygous	1	0.920976	0.406561	10	38-52	31-35	7	24-60	PAT	PAT
A102	SAMN11251463	PRJNA520924	A	10	38-52	Baseline	F	^F508 / N1303K	32	27.9394	G3	heterozygous	1	0.887805	0.539268	9	38-52	31-35	7	24-60	PAT	PAT
A103	SAMN11251465	PRJNA520924	A	10	38-52	Baseline	F	^F508 / N1303K	29	4.79532	G3	heterozygous	1	0.798049	0.694064	8.5	38-52	26-30	6	24-60	PAT	PAT
A104	SAMN11251466	PRJNA520924	A	10	38-52	Baseline	F	^F508 / N1303K	28	5.26974	G3	heterozygous	3	0.774634	0.89657	12	38-52	26-30	6	24-60	PAT	PAT
A105	SAMN11251467	PRJNA520924	A	10	38-52	Baseline	F	^F508 / N1303K	27	9.55435	G3	heterozygous	1	0.849756	0.612319	7	38-52	26-30	6	24-60	PAT	PAT
A106	SAMN11251468	PRJNA520924	A	10	38-52	Baseline	F	^F508 / N1303K	26	1.22807	G3	heterozygous	3	0.477073	1.57358	18	38-52	26-30	6	24-60	PAT	PAT
A107	SAMN11251469	PRJNA520924	A	10	38-52	Baseline	F	^F508 / N1303K	25	6.37984	G3	heterozygous	3	0.802927	0.763396	7	38-52	21-25	5	24-60	PAT	PAT
A108	SAMN11251470	PRJNA520924	A	10	38-52	Baseline	F	^F508 / N1303K	24	36.5185	G3	heterozygous	1	0.943415	0.295989	8	38-52	21-25	5	24-60	PAT	PAT
A109	SAMN11251472	PRJNA520924	A	10	38-52	Baseline	F	^F508 / N1303K	21	62.25	G3	heterozygous	1	0.963902	0.201471	5	38-52	21-25	5	<24	PAT	PAT
A110	SAMN11251473	PRJNA520924	A	10	38-52	Baseline	F	^F508 / N1303K	20	10.4198	G3	heterozygous	3	0.823415	0.734264	10	38-52	16-20	4	<24	PAT	PAT
A111	SAMN11251474	PRJNA520924	A	10	38-52	Baseline	F	^F508 / N1303K	19	4.11243	G3	heterozygous	3	0.672195	1.24361	13	38-52	16-20	4	<24	PAT	PAT
A112	SAMN11251475	PRJNA520924	A	10	38-52	Baseline	F	^F508 / N1303K	18	20.6522	G3	heterozygous	1	0.920976	0.399302	8	38-52	16-20	4	<24	PAT	PAT
A113	SAMN11251476	PRJNA520924	A	10	38-52	Baseline	F	^F508 / N1303K	17	59.2941	G3	heterozygous	1	0.974634	0.139257	4	38-52	16-20	4	<24	PAT	PAT
A114	SAMN35883406	PRJNA987026	A	10	38-52	Exacerbation	F	^F508 / N1303K	13	2.7451	G3	heterozygous	3	0.668293	1.16031	12	38-52	11-15	3	<24	PAT	PAT
A115	SAMN14340061	PRJNA611611	A	10	38-52	Exacerbation	F	^F508 / N1303K	12	17.6415	G3	heterozygous	1	0.906341	0.457404	9	38-52	11-15	3	<24	PAT	PAT
A116	SAMN35883407	PRJNA987026	A	10	38-52	Exacerbation	F	^F508 / N1303K	11	5.72222	G3	heterozygous	3	0.792195	0.798043	10	38-52	11-15	3	<24	PAT	PAT
A117	SAMN35883408	PRJNA987026	A	10	38-52	Exacerbation	F	^F508 / N1303K	10	17.18	G3	heterozygous	1	0.838049	0.587389	4	38-52	6-10	2	<24	PAT	PAT
A118	SAMN35883409	PRJNA987026	A	10	38-52	Exacerbation	F	^F508 / N1303K	9	33.8621	G3	heterozygous	1	0.954146	0.26132	8	38-52	6-10	2	<24	PAT	PAT
A119	SAMN35883410	PRJNA987026	A	10	38-52	Exacerbation	F	^F508 / N1303K	8	21.8182	G3	heterozygous	1	0.92878	0.327741	5	38-52	6-10	2	<24	PAT	PAT
A120	SAMN35883411	PRJNA987026	A	10	38-52	Exacerbation	F	^F508 / N1303K	7	4.39326	G3	heterozygous	3	0.760976	0.913829	17	38-52	6-10	2	<24	PAT	PAT
A121	SAMN35883412	PRJNA987026	A	10	38-52	Exacerbation	F	^F508 / N1303K	6	18.4038	G3	heterozygous	1	0.898537	0.441849	6.5	38-52	6-10	2	<24	PAT	PAT
A122	SAMN35883413	PRJNA987026	A	10	38-52	Exacerbation	F	^F508 / N1303K	5	6.23913	G3	heterozygous	1	0.835122	0.604097	8	38-52	1-5	1	<24	PAT	PAT
A123	SAMN35883414	PRJNA987026	A	10	38-52	Exacerbation	F	^F508 / N1303K	4	8.93069	G3	heterozygous	1	0.853659	0.596927	9.25	38-52	1-5	1	<24	PAT	PAT
A124	SAMN35883415	PRJNA987026	A	10	38-52	Exacerbation	F	^F508 / N1303K	3	5.59864	G3	heterozygous	3	0.797073	0.819707	12	38-52	1-5	1	<24	PAT	PAT
A125	SAMN35883416	PRJNA987026	A	10	38-52	Exacerbation	F	^F508 / N1303K	2	9.2268	G3	heterozygous	1	0.862439	0.583397	11.1667	38-52	1-5	1	<24	PAT	PAT
A126	SAMN35883417	PRJNA987026	A	10	38-52	Exacerbation	F	^F508 / N1303K	1	18.5745	G3	heterozygous	1	0.851707	0.612135	6	38-52	1-5	1	<24	PAT	PAT
B001	SAMN35883162	PRJNA987026	B	3	31-37	Baseline	F	^F508 / ^F508	59	19.8864	G1	homozygous	1	0.49561	1.35402	22.5	31-37	56-60	12	24-60	PAT	PAT
B002	SAMN35883163	PRJNA987026	B	3	31-37	Baseline	F	^F508 / ^F508	58	10.8133	G1	homozygous	3	0.42439	1.53658	18	31-37	56-60	12	24-60	PAT	PAT
B003	SAMN35883164	PRJNA987026	B	3	31-37	Baseline	F	^F508 / ^F508	57	5.56349	G1	homozygous	3	0.429268	1.68257	19.5	31-37	56-60	12	24-60	PAT	PAT
B004	SAMN35883165	PRJNA987026	B	3	31-37	Baseline	F	^F508 / ^F508	56	2.64159	G1	homozygous	3	0.444878	1.83828	21	31-37	56-60	12	24-60	PAT	PAT
B005	SAMN35883166	PRJNA987026	B	3	31-37	Baseline	F	^F508 / ^F508	55	1.29167	G1	homozygous	5	0.202927	2.18447	23	31-37	51-55	11	24-60	AN1	PAT
B006	SAMN35883167	PRJNA987026	B	3	31-37	Baseline	F	^F508 / ^F508	54	3.21134	G1	homozygous	3	0.342439	2.00712	30	31-37	51-55	11	24-60	PAT	PAT
B007	SAMN35883168	PRJNA987026	B	3	31-37	Baseline	F	^F508 / ^F508	53	2.93023	G1	homozygous	3	0.318049	2.15882	26.125	31-37	51-55	11	24-60	PAT	PAT
B008	SAMN35883169	PRJNA987026	B	3	31-37	Baseline	F	^F508 / ^F508	52	2.10993	G1	homozygous	3	0.298537	1.91106	27	31-37	51-55	11	24-60	PAT	PAT
B009	SAMN35883170	PRJNA987026	B	3	31-37	Baseline	F	^F508 / ^F508	51	1.13057	G1	homozygous	5	0.179512	2.40491	24	31-37	51-55	11	24-60	AN1	PAT
B010	SAMN35883171	PRJNA987026	B	3	31-37	Baseline	F	^F508 / ^F508	50	5.08054	G1	homozygous	3	0.404878	1.68932	22.1	31-37	46-50	10	24-60	PAT	PAT
B011	SAMN35883172	PRJNA987026	B	3	31-37	Baseline	F	^F508 / ^F508	49	3.48756	G1	homozygous	3	0.54439	1.64911	24.25	31-37	46-50	10	24-60	PAT	PAT
B012	SAMN35883173	PRJNA987026	B	3	31-37	Baseline	F	^F508 / ^F508	48	2.79668	G1	homozygous	3	0.340488	1.74047	20.6667	31-37	46-50	10	24-60	PAT	PAT
B013	SAMN35883174	PRJNA987026	B	3	31-37	Baseline	F	^F508 / ^F508	47	2.38174	G1	homozygous	3	0.385366	1.99399	25	31-37	46-50	10	24-60	PAT	PAT
B014	SAMN35883175	PRJNA987026	B	3	31-37	Baseline	F	^F508 / ^F508	46	2.51965	G1	homozygous	3	0.36878	2.22456	27	31-37	46-50	10	24-60	PAT	PAT
B015	SAMN35883176	PRJNA987026	B	3	31-37	Baseline	F	^F508 / ^F508	45	3.07254	G1	homozygous	3	0.49561	2.04062	36	31-37	41-45	9	24-60	PAT	PAT
B016	SAMN35883177	PRJNA987026	B	3	31-37	Baseline	F	^F508 / ^F508	44	3.03286	G1	homozygous	3	0.356098	2.12227	30.5	31-37	41-45	9	24-60	PAT	PAT
B017	SAMN35883178	PRJNA987026	B	3	31-37	Baseline	F	^F508 / ^F508	43	1.66202	G1	homozygous	3	0.300488	2.53559	26	31-37	41-45	9	24-60	PAT	PAT
B018	SAMN35883179	PRJNA987026	B	3	31-37	Baseline	F	^F508 / ^F508	42	1.15591	G1	homozygous	5	0.32878	2.30099	26	31-37	41-45	9	24-60	AN1	PAT
B019	SAMN35883180	PRJNA987026	B	3	31-37	Baseline	F	^F508 / ^F508	41	1.13869	G1	homozygous	5	0.228293	2.18673	27	31-37	41-45	9	24-60	AN1	PAT
B020	SAMN35883181	PRJNA987026	B	3	31-37	Baseline	F	^F508 / ^F508	40	2.8178	G1	homozygous	3	0.365854	1.90198	29.25	31-37	36-40	8	24-60	PAT	PAT
B021	SAMN35883182	PRJNA987026	B	3	31-37	Baseline	F	^F508 / ^F508	39	2.78166	G1	homozygous	3	0.443902	1.98873	26.6667	31-37	36-40	8	24-60	PAT	PAT
B022	SAMN35883183	PRJNA987026	B	3	31-37	Baseline	F	^F508 / ^F508	38	3.73404	G1	homozygous	3	0.487805	1.77024	28	31-37	36-40	8	24-60	PAT	PAT
B023	SAMN35883184	PRJNA987026	B	3	31-37	Baseline	F	^F508 / ^F508	37	1.63898	G1	homozygous	3	0.317073	2.3405	30.25	31-37	36-40	8	24-60	PAT	PAT
B024	SAMN35883185	PRJNA987026	B	3	31-37	Baseline	F	^F508 / ^F508	34	2.50633	G1	homozygous	3	0.467317	1.84455	18	31-37	31-35	7	24-60	PAT	PAT
B025	SAMN35883186	PRJNA987026	B	3	31-37	Baseline	F	^F508 / ^F508	33	2.43891	G1	homozygous	3	0.331707	1.97372	14	31-37	31-35	7	24-60	PAT	PAT
B026	SAMN35883187	PRJNA987026	B	3	31-37	Baseline	F	^F508 / ^F508	32	0.614035	G1	homozygous	5	0.162927	2.22543	17	31-37	31-35	7	24-60	AN1	PAT
B027	SAMN35883188	PRJNA987026	B	3	31-37	Baseline	F	^F508 / ^F508	31	1.70349	G1	homozygous	2	0.17561	2.53232	23	31-37	31-35	7	24-60	PAT	PAT
B028	SAMN35883189	PRJNA987026	B	3	31-37	Baseline	F	^F508 / ^F508	30	0.776923	G1	homozygous	5	0.187317	2.53415	22	31-37	26-30	6	24-60	AN1	PAT
B029	SAMN35883190	PRJNA987026	B	3	31-37	Baseline	F	^F508 / ^F508	29	2.66917	G1	homozygous	2	0.234146	2.26742	17	31-37	26-30	6	24-60	PAT	PAT
B030	SAMN35883191	PRJNA987026	B	3	31-37	Baseline	F	^F508 / ^F508	28	6.81731	G1	homozygous	3	0.451707	1.79053	16	31-37	26-30	6	24-60	PAT	PAT
B031	SAMN35883192	PRJNA987026	B	3	31-37	Baseline	F	^F508 / ^F508	27	1.5411	G1	homozygous	3	0.339512	2.18529	21	31-37	26-30	6	24-60	PAT	PAT
B032	SAMN35883193	PRJNA987026	B	3	31-37	Baseline	F	^F508 / ^F508	24	2.7644	G1	homozygous	3	0.462439	2.04981	21.6667	31-37	21-25	5	24-60	PAT	PAT
B033	SAMN35883194	PRJNA987026	B	3	31-37	Baseline	F	^F508 / ^F508	23	2.40741	G1	homozygous	3	0.40878	1.94618	15.5	31-37	21-25	5	<24	PAT	PAT
B034	SAMN35883195	PRJNA987026	B	3	31-37	Baseline	F	^F508 / ^F508	22	4.91447	G1	homozygous	3	0.531707	1.63661	26	31-37	21-25	5	<24	PAT	PAT
B035	SAMN35883196	PRJNA987026	B	3	31-37	Baseline	F	^F508 / ^F508	21	2.88235	G1	homozygous	3	0.569756	1.60229	16	31-37	21-25	5	<24	PAT	PAT
B036	SAMN35883197	PRJNA987026	B	3	31-37	Baseline	F	^F508 / ^F508	20	8.61628	G1	homozygous	3	0.457561	1.76219	20	31-37	16-20	4	<24	PAT	PAT
B037	SAMN35883198	PRJNA987026	B	3	31-37	Baseline	F	^F508 / ^F508	17	9.2449	G1	homozygous	2	0.249756	2.16532	20	31-37	16-20	4	<24	PAT	PAT
B038	SAMN35883199	PRJNA987026	B	3	31-37	Baseline	F	^F508 / ^F508	16	10.4667	G1	homozygous	3	0.476098	1.88066	16	31-37	16-20	4	<24	PAT	PAT
B039	SAMN35883200	PRJNA987026	B	3	31-37	Baseline	F	^F508 / ^F508	15	3.56489	G1	homozygous	2	0.420488	1.86827	18.25	31-37	11-15	3	<24	PAT	PAT
B040	SAMN35883201	PRJNA987026	B	3	31-37	Exacerbation	F	^F508 / ^F508	14	3.43558	G1	homozygous	3	0.369756	2.16232	19	31-37	11-15	3	<24	PAT	PAT
B041	SAMN35883202	PRJNA987026	B	3	31-37	Exacerbation	F	^F508 / ^F508	13	2.81522	G1	homozygous	3	0.405854	2.18342	18	31-37	11-15	3	<24	PAT	PAT
B042	SAMN35883203	PRJNA987026	B	3	31-37	Exacerbation	F	^F508 / ^F508	12	6.25758	G1	homozygous	2	0.24	2.26581	18	31-37	11-15	3	<24	PAT	PAT
B043	SAMN35883204	PRJNA987026	B	3	31-37	Exacerbation	F	^F508 / ^F508	11	3.66429	G1	homozygous	2	0.318049	2.25955	23	31-37	11-15	3	<24	PAT	PAT
B044	SAMN35883205	PRJNA987026	B	3	31-37	Exacerbation	F	^F508 / ^F508	10	6.70833	G1	homozygous	3	0.374634	1.82712	17	31-37	6-10	2	<24	PAT	PAT
B045	SAMN35883206	PRJNA987026	B	3	31-37	Exacerbation	F	^F508 / ^F508	9	3.41714	G1	homozygous	3	0.334634	1.9799	18	31-37	6-10	2	<24	PAT	PAT
B046	SAMN35883207	PRJNA987026	B	3	31-37	Exacerbation	F	^F508 / ^F508	8	6.77966	G1	homozygous	3	0.506341	1.47113	15	31-37	6-10	2	<24	PAT	PAT
B047	SAMN35883208	PRJNA987026	B	3	31-37	Exacerbation	F	^F508 / ^F508	7	1.11154	G1	homozygous	2	0.227317	2.1538	16	31-37	6-10	2	<24	PAT	PAT
B048	SAMN35883209	PRJNA987026	B	3	31-37	Exacerbation	F	^F508 / ^F508	6	4.14504	G1	homozygous	3	0.283902	2.14631	17	31-37	6-10	2	<24	PAT	PAT
B049	SAMN35883210	PRJNA987026	B	3	31-37	Exacerbation	F	^F508 / ^F508	5	2.76506	G1	homozygous	2	0.33561	2.00004	15	31-37	1-5	1	<24	PAT	PAT
B050	SAMN35883211	PRJNA987026	B	3	31-37	Exacerbation	F	^F508 / ^F508	4	1.05686	G1	homozygous	2	0.163902	2.00573	16	31-37	1-5	1	<24	PAT	PAT
B051	SAMN35883212	PRJNA987026	B	3	31-37	Exacerbation	F	^F508 / ^F508	3	1.29615	G1	homozygous	2	0.24878	1.93618	15.5	31-37	1-5	1	<24	PAT	PAT
B052	SAMN35883213	PRJNA987026	B	3	31-37	Exacerbation	F	^F508 / ^F508	2	5.16379	G1	homozygous	3	0.323902	1.73229	8	31-37	1-5	1	<24	AN1	PAT
B053	SAMN35883214	PRJNA987026	B	3	31-37	Exacerbation	F	^F508 / ^F508	1	4.03333	G1	homozygous	3	0.37561	2.02891	23	31-37	1-5	1	<24	PAT	PAT
C001	SAMN35883215	PRJNA987026	C	4	31-37	Baseline	M	^F508 / ^F508	59	0.151625	G1	homozygous	4	0.106341	1.32684	8	31-37	56-60	12	24-60	AN1	AN1
C002	SAMN35883216	PRJNA987026	C	4	31-37	Baseline	M	^F508 / ^F508	58	0.0485232	G1	homozygous	4	0.0380488	1.03796	8	31-37	56-60	12	24-60	AN1	AN1
C003	SAMN35883217	PRJNA987026	C	4	31-37	Baseline	M	^F508 / ^F508	57	0.0911136	G1	homozygous	4	0.057561	1.22463	7	31-37	56-60	12	24-60	AN1	AN1
C004	SAMN35883218	PRJNA987026	C	4	31-37	Baseline	M	^F508 / ^F508	56	0.112222	G1	homozygous	4	0.0907317	1.05544	6	31-37	56-60	12	24-60	AN1	AN1
C005	SAMN35883219	PRJNA987026	C	4	31-37	Baseline	M	^F508 / ^F508	55	0.132934	G1	homozygous	4	0.0829268	1.36179	10	31-37	51-55	11	24-60	AN1	AN1
C006	SAMN35883220	PRJNA987026	C	4	31-37	Baseline	M	^F508 / ^F508	54	0.0131712	G1	homozygous	4	0.0107317	0.859275	8	31-37	51-55	11	24-60	AN1	AN1
C007	SAMN35883221	PRJNA987026	C	4	31-37	Baseline	M	^F508 / ^F508	53	0.095843	G1	homozygous	4	0.0653659	1.24651	9	31-37	51-55	11	24-60	AN1	AN1
C008	SAMN35883222	PRJNA987026	C	4	31-37	Baseline	M	^F508 / ^F508	52	0.0359029	G1	homozygous	4	0.0312195	1.00781	7	31-37	51-55	11	24-60	AN1	AN1
C009	SAMN35883223	PRJNA987026	C	4	31-37	Baseline	M	^F508 / ^F508	51	0.0664414	G1	homozygous	4	0.0487805	1.43231	20	31-37	51-55	11	24-60	AN1	AN1
C010	SAMN35883224	PRJNA987026	C	4	31-37	Baseline	M	^F508 / ^F508	50	0.0474041	G1	homozygous	4	0.0331707	1.7217	27.0833	31-37	46-50	10	24-60	AN1	AN1
C011	SAMN35883225	PRJNA987026	C	4	31-37	Baseline	M	^F508 / ^F508	49	0.141753	G1	homozygous	4	0.0917073	1.58635	13	31-37	46-50	10	24-60	AN1	AN1
C012	SAMN35883226	PRJNA987026	C	4	31-37	Baseline	M	^F508 / ^F508	48	0.0132383	G1	homozygous	4	0.00878049	1.00795	12.25	31-37	46-50	10	24-60	AN1	AN1
C013	SAMN35883227	PRJNA987026	C	4	31-37	Baseline	M	^F508 / ^F508	47	0.129496	G1	homozygous	4	0.0946341	1.37163	11.5	31-37	46-50	10	24-60	AN1	AN1
C014	SAMN35883228	PRJNA987026	C	4	31-37	Baseline	M	^F508 / ^F508	46	0.0323929	G1	homozygous	4	0.0234146	0.988797	7	31-37	46-50	10	24-60	AN1	AN1
C015	SAMN35883229	PRJNA987026	C	4	31-37	Baseline	M	^F508 / ^F508	43	0.0839599	G1	homozygous	4	0.062439	1.60412	14	31-37	41-45	9	24-60	AN1	AN1
C016	SAMN35883230	PRJNA987026	C	4	31-37	Baseline	M	^F508 / ^F508	42	0.0410367	G1	homozygous	4	0.0370732	1.02112	5	31-37	41-45	9	24-60	AN1	AN1
C017	SAMN35883231	PRJNA987026	C	4	31-37	Baseline	M	^F508 / ^F508	41	0.088964	G1	homozygous	4	0.0731707	1.22	10	31-37	41-45	9	24-60	AN1	AN1
C018	SAMN35883232	PRJNA987026	C	4	31-37	Baseline	M	^F508 / ^F508	40	0.0729761	G1	homozygous	4	0.0497561	1.21378	8	31-37	36-40	8	24-60	AN1	AN1
C019	SAMN35883233	PRJNA987026	C	4	31-37	Baseline	M	^F508 / ^F508	39	0.0569832	G1	homozygous	4	0.044878	1.22188	10	31-37	36-40	8	24-60	AN1	AN1
C020	SAMN35883234	PRJNA987026	C	4	31-37	Baseline	M	^F508 / ^F508	38	0.0653983	G1	homozygous	4	0.0526829	1.21677	9	31-37	36-40	8	24-60	AN1	AN1
C021	SAMN35883235	PRJNA987026	C	4	31-37	Baseline	M	^F508 / ^F508	37	0.0452436	G1	homozygous	4	0.0321951	1.37294	13	31-37	36-40	8	24-60	AN1	AN1
C022	SAMN35883236	PRJNA987026	C	4	31-37	Baseline	M	^F508 / ^F508	36	0.0662921	G1	homozygous	4	0.0487805	1.35309	15.6667	31-37	36-40	8	24-60	AN1	AN1
C023	SAMN35883237	PRJNA987026	C	4	31-37	Baseline	M	^F508 / ^F508	35	0.186633	G1	homozygous	4	0.138537	1.56353	18.125	31-37	31-35	7	24-60	AN1	AN1
C024	SAMN35883238	PRJNA987026	C	4	31-37	Baseline	M	^F508 / ^F508	34	0.156815	G1	homozygous	4	0.0721951	1.29854	7	31-37	31-35	7	24-60	AN1	AN1
C025	SAMN35883239	PRJNA987026	C	4	31-37	Baseline	M	^F508 / ^F508	33	0.0488636	G1	homozygous	4	0.0370732	1.17429	22	31-37	31-35	7	24-60	AN1	AN1
C026	SAMN35883240	PRJNA987026	C	4	31-37	Baseline	M	^F508 / ^F508	32	0.0399556	G1	homozygous	4	0.0331707	1.24901	37	31-37	31-35	7	24-60	AN2	AN1
C027	SAMN35883241	PRJNA987026	C	4	31-37	Baseline	M	^F508 / ^F508	31	0.0309392	G1	homozygous	4	0.0234146	1.11371	9	31-37	31-35	7	24-60	AN1	AN1
C028	SAMN35883242	PRJNA987026	C	4	31-37	Baseline	M	^F508 / ^F508	30	0.0721311	G1	homozygous	4	0.0565854	1.12616	9	31-37	26-30	6	24-60	AN1	AN1
C029	SAMN35883243	PRJNA987026	C	4	31-37	Baseline	M	^F508 / ^F508	29	0.0707965	G1	homozygous	4	0.0585366	1.1028	6	31-37	26-30	6	24-60	AN1	AN1
C030	SAMN35883244	PRJNA987026	C	4	31-37	Baseline	M	^F508 / ^F508	25	0.0847851	G1	homozygous	4	0.0653659	1.34343	9	31-37	21-25	5	24-60	AN1	AN1
C031	SAMN35883245	PRJNA987026	C	4	31-37	Baseline	M	^F508 / ^F508	24	0.126478	G1	homozygous	4	0.084878	1.27275	7	31-37	21-25	5	24-60	AN1	AN1
C032	SAMN35883246	PRJNA987026	C	4	31-37	Baseline	M	^F508 / ^F508	19	0.0955631	G1	homozygous	4	0.0819512	1.20603	7	31-37	16-20	4	<24	AN1	AN1
C033	SAMN35883247	PRJNA987026	C	4	31-37	Baseline	M	^F508 / ^F508	18	0.0829493	G1	homozygous	4	0.0614634	1.25858	8	31-37	16-20	4	<24	AN1	AN1
C034	SAMN35883248	PRJNA987026	C	4	31-37	Baseline	M	^F508 / ^F508	17	0.0728261	G1	homozygous	4	0.057561	1.10705	8	31-37	16-20	4	<24	AN1	AN1
C035	SAMN35883249	PRJNA987026	C	4	31-37	Baseline	M	^F508 / ^F508	16	0.120095	G1	homozygous	4	0.0760976	1.40883	9	31-37	16-20	4	<24	AN1	AN1
C036	SAMN35883250	PRJNA987026	C	4	31-37	Baseline	M	^F508 / ^F508	15	0.114422	G1	homozygous	4	0.0790244	1.31316	8	31-37	11-15	3	<24	AN1	AN1
C037	SAMN35883251	PRJNA987026	C	4	31-37	Exacerbation	M	^F508 / ^F508	14	0.0719823	G1	homozygous	4	0.0634146	1.10686	6	31-37	11-15	3	<24	AN1	AN1
C038	SAMN35883252	PRJNA987026	C	4	31-37	Exacerbation	M	^F508 / ^F508	13	0.104478	G1	homozygous	4	0.0770732	1.22827	8	31-37	11-15	3	<24	AN1	AN1
D001	SAMN35883253	PRJNA987026	D	5	<31	Baseline	M	^F508 / ^F508	59	0	G1	homozygous	6	0	2.72147	29	<31	56-60	12	24-60	AN1	AN2
D002	SAMN35883254	PRJNA987026	D	5	<31	Baseline	M	^F508 / ^F508	58	0	G1	homozygous	6	0	2.60666	31.5	<31	56-60	12	24-60	AN1	AN2
D003	SAMN35883255	PRJNA987026	D	5	<31	Baseline	M	^F508 / ^F508	57	0	G1	homozygous	6	0	2.44988	31.5	<31	56-60	12	24-60	AN1	AN2
D004	SAMN35883256	PRJNA987026	D	5	<31	Baseline	M	^F508 / ^F508	56	0	G1	homozygous	6	0	2.5853	32.25	<31	56-60	12	24-60	AN1	AN2
D005	SAMN35883257	PRJNA987026	D	5	<31	Baseline	M	^F508 / ^F508	55	0.0027248	G1	homozygous	6	0.00097561	2.80739	32.5	<31	51-55	11	24-60	AN1	AN2
D006	SAMN35883258	PRJNA987026	D	5	<31	Baseline	M	^F508 / ^F508	54	0	G1	homozygous	6	0	2.56276	47	<31	51-55	11	24-60	AN2	AN2
D007	SAMN35883259	PRJNA987026	D	5	<31	Baseline	M	^F508 / ^F508	53	0	G1	homozygous	6	0	2.56368	27	<31	51-55	11	24-60	AN1	AN2
D008	SAMN35883260	PRJNA987026	D	5	<31	Baseline	M	^F508 / ^F508	52	0	G1	homozygous	6	0	2.90885	39	<31	51-55	11	24-60	AN2	AN2
D009	SAMN35883261	PRJNA987026	D	5	<31	Baseline	M	^F508 / ^F508	51	0	G1	homozygous	6	0	2.3843	25.125	<31	51-55	11	24-60	AN1	AN2
D010	SAMN35883262	PRJNA987026	D	5	<31	Baseline	M	^F508 / ^F508	50	0.0023753	G1	homozygous	6	0.00097561	2.6398	41.5	<31	46-50	10	24-60	AN2	AN2
D011	SAMN35883263	PRJNA987026	D	5	<31	Baseline	M	^F508 / ^F508	49	0	G1	homozygous	6	0	2.68913	28	<31	46-50	10	24-60	AN1	AN2
D012	SAMN35883264	PRJNA987026	D	5	<31	Baseline	M	^F508 / ^F508	48	0	G1	homozygous	6	0	2.86284	32	<31	46-50	10	24-60	AN1	AN2
D013	SAMN35883265	PRJNA987026	D	5	<31	Baseline	M	^F508 / ^F508	47	0	G1	homozygous	6	0	2.63959	29.125	<31	46-50	10	24-60	AN1	AN2
D014	SAMN35883266	PRJNA987026	D	5	<31	Baseline	M	^F508 / ^F508	46	0	G1	homozygous	6	0	2.64185	23	<31	46-50	10	24-60	AN1	AN2
D015	SAMN35883267	PRJNA987026	D	5	<31	Baseline	M	^F508 / ^F508	45	0.00350877	G1	homozygous	6	0.00097561	2.70901	40	<31	41-45	9	24-60	AN2	AN2
D016	SAMN35883268	PRJNA987026	D	5	<31	Baseline	M	^F508 / ^F508	44	0.00686499	G1	homozygous	6	0.00292683	2.88439	34.5	<31	41-45	9	24-60	AN1	AN2
D017	SAMN35883269	PRJNA987026	D	5	<31	Baseline	M	^F508 / ^F508	43	0.00251889	G1	homozygous	6	0.00097561	2.60311	28.1667	<31	41-45	9	24-60	AN1	AN2
D018	SAMN35883270	PRJNA987026	D	5	<31	Baseline	M	^F508 / ^F508	42	0	G1	homozygous	6	0	2.56084	25	<31	41-45	9	24-60	AN1	AN2
D019	SAMN35883271	PRJNA987026	D	5	<31	Baseline	M	^F508 / ^F508	41	0	G1	homozygous	6	0	2.57907	31.75	<31	41-45	9	24-60	AN1	AN2
D020	SAMN35883272	PRJNA987026	D	5	<31	Baseline	M	^F508 / ^F508	40	0.00750469	G1	homozygous	6	0.00390244	2.87295	33.1667	<31	36-40	8	24-60	AN1	AN2
D021	SAMN35883273	PRJNA987026	D	5	<31	Baseline	M	^F508 / ^F508	39	0	G1	homozygous	6	0	2.72688	27.6667	<31	36-40	8	24-60	AN1	AN2
D022	SAMN35883274	PRJNA987026	D	5	<31	Baseline	M	^F508 / ^F508	38	0	G1	homozygous	6	0	2.48498	33	<31	36-40	8	24-60	AN1	AN2
D023	SAMN35883275	PRJNA987026	D	5	<31	Baseline	M	^F508 / ^F508	37	0.114035	G1	homozygous	6	0.0507317	2.6082	33	<31	36-40	8	24-60	AN1	AN2
D024	SAMN35883276	PRJNA987026	D	5	<31	Baseline	M	^F508 / ^F508	36	0	G1	homozygous	6	0	2.6194	32.5	<31	36-40	8	24-60	AN1	AN2
D025	SAMN35883277	PRJNA987026	D	5	<31	Baseline	M	^F508 / ^F508	35	0	G1	homozygous	6	0	2.7746	38	<31	31-35	7	24-60	AN2	AN2
D026	SAMN35883278	PRJNA987026	D	5	<31	Baseline	M	^F508 / ^F508	34	0.00291121	G1	homozygous	6	0.00195122	2.66731	29	<31	31-35	7	24-60	AN1	AN2
D027	SAMN35883279	PRJNA987026	D	5	<31	Baseline	M	^F508 / ^F508	33	0.0043573	G1	homozygous	6	0.00195122	3.0104	38.5	<31	31-35	7	24-60	AN2	AN2
D028	SAMN35883280	PRJNA987026	D	5	<31	Baseline	M	^F508 / ^F508	32	0.0189983	G1	homozygous	6	0.00780488	3.15727	37	<31	31-35	7	24-60	AN2	AN2
D029	SAMN35883281	PRJNA987026	D	5	<31	Baseline	M	^F508 / ^F508	31	0.0168776	G1	homozygous	6	0.00780488	2.85974	38.5	<31	31-35	7	24-60	AN2	AN2
D030	SAMN35883282	PRJNA987026	D	5	<31	Baseline	M	^F508 / ^F508	30	0	G1	homozygous	6	0	2.75465	40.1667	<31	26-30	6	24-60	AN2	AN2
D031	SAMN35883283	PRJNA987026	D	5	<31	Baseline	M	^F508 / ^F508	29	0	G1	homozygous	6	0	2.76335	36	<31	26-30	6	24-60	AN1	AN2
D032	SAMN35883284	PRJNA987026	D	5	<31	Baseline	M	^F508 / ^F508	28	0	G1	homozygous	6	0	2.65274	31.5	<31	26-30	6	24-60	AN1	AN2
D033	SAMN35883285	PRJNA987026	D	5	<31	Baseline	M	^F508 / ^F508	27	0	G1	homozygous	6	0	3.07348	45.1667	<31	26-30	6	24-60	AN2	AN2
D034	SAMN35883286	PRJNA987026	D	5	<31	Baseline	M	^F508 / ^F508	18	0.0309478	G1	homozygous	6	0.0136585	3.27983	48.25	<31	16-20	4	<24	AN2	AN2
D035	SAMN35883287	PRJNA987026	D	5	<31	Baseline	M	^F508 / ^F508	17	0	G1	homozygous	6	0	2.88425	33.125	<31	16-20	4	<24	AN1	AN2
D036	SAMN35883288	PRJNA987026	D	5	<31	Baseline	M	^F508 / ^F508	16	0.00176056	G1	homozygous	6	0.00097561	3.05995	112.5	<31	16-20	4	<24	AN2	AN2
D037	SAMN35883289	PRJNA987026	D	5	<31	Baseline	M	^F508 / ^F508	15	0.00178253	G1	homozygous	6	0.00097561	2.822	44	<31	11-15	3	<24	AN2	AN2
D038	SAMN35883290	PRJNA987026	D	5	<31	Exacerbation	M	^F508 / ^F508	14	0.00183823	G1	homozygous	6	0.00097561	2.62768	35.125	<31	11-15	3	<24	AN1	AN2
D039	SAMN35883291	PRJNA987026	D	5	<31	Exacerbation	M	^F508 / ^F508	13	0.00293255	G1	homozygous	6	0.00097561	2.88648	36.5	<31	11-15	3	<24	AN2	AN2
D040	SAMN35883292	PRJNA987026	D	5	<31	Exacerbation	M	^F508 / ^F508	12	0.0231884	G1	homozygous	6	0.00780488	2.98213	40	<31	11-15	3	<24	AN2	AN2
D041	SAMN35883293	PRJNA987026	D	5	<31	Exacerbation	M	^F508 / ^F508	11	0	G1	homozygous	6	0	3.01929	40.5	<31	11-15	3	<24	AN2	AN2
D042	SAMN35883294	PRJNA987026	D	5	<31	Exacerbation	M	^F508 / ^F508	10	0.00823045	G1	homozygous	6	0.00195122	2.90627	39.125	<31	6-10	2	<24	AN2	AN2
D043	SAMN35883295	PRJNA987026	D	5	<31	Exacerbation	M	^F508 / ^F508	9	0.00170068	G1	homozygous	6	0.00097561	2.91508	42	<31	6-10	2	<24	AN2	AN2
D044	SAMN35883296	PRJNA987026	D	5	<31	Exacerbation	M	^F508 / ^F508	8	0.00416667	G1	homozygous	6	0.00195122	2.88908	54.5	<31	6-10	2	<24	AN2	AN2
D045	SAMN35883297	PRJNA987026	D	5	<31	Exacerbation	M	^F508 / ^F508	7	0.00545454	G1	homozygous	6	0.00195122	3.08998	51.125	<31	6-10	2	<24	AN2	AN2
D046	SAMN35883298	PRJNA987026	D	5	<31	Exacerbation	M	^F508 / ^F508	6	0	G1	homozygous	6	0	3.11332	43.6	<31	6-10	2	<24	AN2	AN2
D047	SAMN35883299	PRJNA987026	D	5	<31	Exacerbation	M	^F508 / ^F508	5	0.00191939	G1	homozygous	6	0.00097561	2.96878	43	<31	1-5	1	<24	AN2	AN2
D048	SAMN35883300	PRJNA987026	D	5	<31	Exacerbation	M	^F508 / ^F508	4	0.00145349	G1	homozygous	6	0.00195122	2.87797	45.5	<31	1-5	1	<24	AN2	AN2
D049	SAMN35883301	PRJNA987026	D	5	<31	Exacerbation	M	^F508 / ^F508	3	0.028169	G1	homozygous	6	0.0195122	2.79569	25	<31	1-5	1	<24	AN1	AN2
D050	SAMN35883302	PRJNA987026	D	5	<31	Exacerbation	M	^F508 / ^F508	2	0.00566038	G1	homozygous	6	0.00585366	2.97616	46.125	<31	1-5	1	<24	AN2	AN2
E001	SAMN10871642	PRJNA520924	E	6	<31	Baseline	F	^F508 / ^F508	59	1.28488	G1	homozygous	3	0.372683	2.56278	53.375	<31	56-60	12	24-60	PAT	AN2
E002	SAMN10871643	PRJNA520924	E	6	<31	Baseline	F	^F508 / ^F508	58	0.7431	G1	homozygous	5	0.270244	2.74692	41.6	<31	56-60	12	24-60	AN2	AN2
E003	SAMN10871644	PRJNA520924	E	6	<31	Baseline	F	^F508 / ^F508	57	0.683128	G1	homozygous	5	0.291707	2.75203	47.3333	<31	56-60	12	24-60	AN2	AN2
E004	SAMN10871645	PRJNA520924	E	6	<31	Baseline	F	^F508 / ^F508	56	0.678862	G1	homozygous	5	0.302439	2.73603	84.9	<31	56-60	12	24-60	AN2	AN2
E005	SAMN10871646	PRJNA520924	E	6	<31	Baseline	F	^F508 / ^F508	55	0.356667	G1	homozygous	5	0.136585	2.90677	80.0625	<31	51-55	11	24-60	AN2	AN2
E006	SAMN10871647	PRJNA520924	E	6	<31	Baseline	F	^F508 / ^F508	54	0.93985	G1	homozygous	3	0.309268	2.59089	72.5	<31	51-55	11	24-60	PAT	AN2
E007	SAMN10871648	PRJNA520924	E	6	<31	Baseline	F	^F508 / ^F508	53	2.50218	G1	homozygous	3	0.294634	2.29179	36.125	<31	51-55	11	24-60	PAT	AN2
E008	SAMN10871649	PRJNA520924	E	6	<31	Baseline	F	^F508 / ^F508	52	0.338028	G1	homozygous	5	0.158049	2.89295	64.1	<31	51-55	11	24-60	AN2	AN2
E009	SAMN10871650	PRJNA520924	E	6	<31	Baseline	F	^F508 / ^F508	51	1.16111	G1	homozygous	5	0.24878	2.85427	96	<31	51-55	11	24-60	AN2	AN2
E010	SAMN10871651	PRJNA520924	E	6	31-37	Baseline	F	^F508 / ^F508	50	0.416357	G1	homozygous	5	0.204878	2.8294	55	31-37	46-50	10	24-60	AN2	AN2
E011	SAMN10871652	PRJNA520924	E	6	31-37	Baseline	F	^F508 / ^F508	49	0.498162	G1	homozygous	5	0.137561	2.92591	55.4	31-37	46-50	10	24-60	AN2	AN2
E012	SAMN10871653	PRJNA520924	E	6	31-37	Baseline	F	^F508 / ^F508	48	0.980769	G1	homozygous	5	0.279024	2.39429	34.6	31-37	46-50	10	24-60	AN2	AN2
E013	SAMN10871654	PRJNA520924	E	6	31-37	Baseline	F	^F508 / ^F508	47	0.518248	G1	homozygous	5	0.243902	2.67816	52	31-37	46-50	10	24-60	AN2	AN2
E014	SAMN10871655	PRJNA520924	E	6	31-37	Baseline	F	^F508 / ^F508	46	0.262887	G1	homozygous	5	0.113171	2.81141	48	31-37	46-50	10	24-60	AN2	AN2
E015	SAMN10871657	PRJNA520924	E	6	31-37	Baseline	F	^F508 / ^F508	43	0.652259	G1	homozygous	5	0.24	2.66162	51.0417	31-37	41-45	9	24-60	AN2	AN2
E016	SAMN10871658	PRJNA520924	E	6	31-37	Baseline	F	^F508 / ^F508	42	0.693712	G1	homozygous	5	0.186341	2.63799	39.3333	31-37	41-45	9	24-60	AN2	AN2
E017	SAMN10871659	PRJNA520924	E	6	31-37	Baseline	F	^F508 / ^F508	41	0.386957	G1	homozygous	5	0.131707	3.17232	80.75	31-37	41-45	9	24-60	AN2	AN2
E018	SAMN10871660	PRJNA520924	E	6	31-37	Baseline	F	^F508 / ^F508	40	2	G1	homozygous	3	0.36878	2.36425	44.125	31-37	36-40	8	24-60	PAT	AN2
E019	SAMN10871661	PRJNA520924	E	6	31-37	Baseline	F	^F508 / ^F508	39	1.34615	G1	homozygous	3	0.270244	2.74058	68.8889	31-37	36-40	8	24-60	PAT	AN2
E020	SAMN10871662	PRJNA520924	E	6	31-37	Baseline	F	^F508 / ^F508	38	0.793605	G1	homozygous	5	0.213659	2.82261	55.75	31-37	36-40	8	24-60	AN2	AN2
E021	SAMN10871663	PRJNA520924	E	6	31-37	Baseline	F	^F508 / ^F508	37	0.456979	G1	homozygous	5	0.165854	2.93288	62.125	31-37	36-40	8	24-60	AN2	AN2
E022	SAMN10871664	PRJNA520924	E	6	31-37	Baseline	F	^F508 / ^F508	36	0.800454	G1	homozygous	5	0.235122	2.66193	61.1	31-37	36-40	8	24-60	AN2	AN2
E023	SAMN10871665	PRJNA520924	E	6	31-37	Baseline	F	^F508 / ^F508	35	1.89375	G1	homozygous	3	0.501463	1.98503	37.6667	31-37	31-35	7	24-60	PAT	AN2
E024	SAMN10871666	PRJNA520924	E	6	31-37	Baseline	F	^F508 / ^F508	34	0.264348	G1	homozygous	5	0.0839024	3.21405	74.6818	31-37	31-35	7	24-60	AN2	AN2
E025	SAMN10871667	PRJNA520924	E	6	31-37	Baseline	F	^F508 / ^F508	33	0.552585	G1	homozygous	5	0.287805	2.43889	39.6	31-37	31-35	7	24-60	AN2	AN2
E026	SAMN10871668	PRJNA520924	E	6	31-37	Baseline	F	^F508 / ^F508	32	0.264748	G1	homozygous	5	0.124878	2.36202	20	31-37	31-35	7	24-60	AN1	AN2
E027	SAMN10871669	PRJNA520924	E	6	31-37	Baseline	F	^F508 / ^F508	31	0.579965	G1	homozygous	5	0.183415	2.52112	34.5	31-37	31-35	7	24-60	AN2	AN2
E028	SAMN10871670	PRJNA520924	E	6	31-37	Baseline	F	^F508 / ^F508	30	0.524412	G1	homozygous	5	0.146341	2.64115	40.0833	31-37	26-30	6	24-60	AN2	AN2
E029	SAMN10871671	PRJNA520924	E	6	31-37	Baseline	F	^F508 / ^F508	29	1.05631	G1	homozygous	3	0.27122	2.35653	28	31-37	26-30	6	24-60	PAT	AN2
E030	SAMN10871672	PRJNA520924	E	6	31-37	Baseline	F	^F508 / ^F508	28	0.331126	G1	homozygous	5	0.105366	3.00653	43.6667	31-37	26-30	6	24-60	AN2	AN2
E031	SAMN10871673	PRJNA520924	E	6	31-37	Baseline	F	^F508 / ^F508	27	0.625	G1	homozygous	5	0.221463	2.57818	38	31-37	26-30	6	24-60	AN2	AN2
E032	SAMN10871674	PRJNA520924	E	6	31-37	Baseline	F	^F508 / ^F508	26	1.30469	G1	homozygous	3	0.350244	2.27375	38.6	31-37	26-30	6	24-60	PAT	AN2
E033	SAMN10871675	PRJNA520924	E	6	31-37	Baseline	F	^F508 / ^F508	25	0.345395	G1	homozygous	5	0.187317	2.67225	39	31-37	21-25	5	24-60	AN2	AN2
E034	SAMN10871677	PRJNA520924	E	6	31-37	Baseline	F	^F508 / ^F508	22	0.460821	G1	homozygous	5	0.229268	2.77865	43.125	31-37	21-25	5	<24	AN2	AN2
E035	SAMN10871678	PRJNA520924	E	6	31-37	Baseline	F	^F508 / ^F508	21	0.263581	G1	homozygous	5	0.0643902	3.16989	60.0833	31-37	21-25	5	<24	AN2	AN2
E036	SAMN10871679	PRJNA520924	E	6	31-37	Baseline	F	^F508 / ^F508	20	0.73904	G1	homozygous	5	0.299512	2.56735	42.5	31-37	16-20	4	<24	AN2	AN2
E037	SAMN10871680	PRJNA520924	E	6	31-37	Baseline	F	^F508 / ^F508	19	0.714286	G1	homozygous	5	0.237073	2.81274	54.5714	31-37	16-20	4	<24	AN2	AN2
E038	SAMN10871681	PRJNA520924	E	6	31-37	Baseline	F	^F508 / ^F508	18	0.937126	G1	homozygous	5	0.29561	2.68765	45.1667	31-37	16-20	4	<24	AN2	AN2
E039	SAMN10871682	PRJNA520924	E	6	31-37	Baseline	F	^F508 / ^F508	17	1.03562	G1	homozygous	3	0.337561	2.47884	45	31-37	16-20	4	<24	PAT	AN2
E040	SAMN10871683	PRJNA520924	E	6	31-37	Baseline	F	^F508 / ^F508	16	0.677419	G1	homozygous	5	0.276098	2.59944	39	31-37	16-20	4	<24	AN2	AN2
E041	SAMN10871684	PRJNA520924	E	6	31-37	Baseline	F	^F508 / ^F508	15	0.0428135	G1	homozygous	6	0.022439	3.06705	67.125	31-37	11-15	3	<24	AN2	AN2
E042	SAMN35883303	PRJNA987026	E	6	31-37	Exacerbation	F	^F508 / ^F508	14	0.665037	G1	homozygous	5	0.236098	2.58966	38.5	31-37	11-15	3	<24	AN2	AN2
E043	SAMN35883304	PRJNA987026	E	6	31-37	Exacerbation	F	^F508 / ^F508	13	1.42857	G1	homozygous	3	0.381463	2.30868	29.125	31-37	11-15	3	<24	PAT	AN2
E044	SAMN35883305	PRJNA987026	E	6	31-37	Exacerbation	F	^F508 / ^F508	12	0.598891	G1	homozygous	5	0.29561	2.48925	35.5625	31-37	11-15	3	<24	AN2	AN2
E045	SAMN35883306	PRJNA987026	E	6	31-37	Exacerbation	F	^F508 / ^F508	11	0.110638	G1	homozygous	5	0.0419512	3.11524	54.0833	31-37	11-15	3	<24	AN2	AN2
E046	SAMN35883307	PRJNA987026	E	6	31-37	Exacerbation	F	^F508 / ^F508	10	0.0121359	G1	homozygous	4	0.0097561	2.761	51.0625	31-37	6-10	2	<24	AN2	AN2
E047	SAMN35883308	PRJNA987026	E	6	31-37	Exacerbation	F	^F508 / ^F508	9	1.09745	G1	homozygous	3	0.280976	2.49893	33	31-37	6-10	2	<24	PAT	AN2
E048	SAMN35883309	PRJNA987026	E	6	31-37	Exacerbation	F	^F508 / ^F508	8	0.92487	G1	homozygous	5	0.237073	2.63758	41.6	31-37	6-10	2	<24	AN2	AN2
E049	SAMN35883310	PRJNA987026	E	6	31-37	Exacerbation	F	^F508 / ^F508	7	0.16042	G1	homozygous	5	0.0565854	3.31391	65.5556	31-37	6-10	2	<24	AN2	AN2
E050	SAMN35883311	PRJNA987026	E	6	31-37	Exacerbation	F	^F508 / ^F508	6	0.445545	G1	homozygous	5	0.189268	2.8561	49.5	31-37	6-10	2	<24	AN2	AN2
E051	SAMN35883312	PRJNA987026	E	6	31-37	Exacerbation	F	^F508 / ^F508	5	0.590426	G1	homozygous	5	0.183415	2.69031	63.4	31-37	1-5	1	<24	AN2	AN2
E052	SAMN35883313	PRJNA987026	E	6	31-37	Exacerbation	F	^F508 / ^F508	4	0.301153	G1	homozygous	5	0.145366	2.74567	37.6429	31-37	1-5	1	<24	AN2	AN2
E053	SAMN35883314	PRJNA987026	E	6	31-37	Exacerbation	F	^F508 / ^F508	3	0.491228	G1	homozygous	5	0.188293	2.94341	60.5714	31-37	1-5	1	<24	AN2	AN2
E054	SAMN35883315	PRJNA987026	E	6	31-37	Exacerbation	F	^F508 / ^F508	2	1.42969	G1	homozygous	3	0.438049	2.19832	33.1	31-37	1-5	1	<24	PAT	AN2
E055	SAMN35883316	PRJNA987026	E	6	31-37	Exacerbation	F	^F508 / ^F508	1	0.621818	G1	homozygous	5	0.260488	2.73342	50.5	31-37	1-5	1	<24	AN2	AN2
E056	SAMN11251398	PRJNA520924	E	7	31-37	Baseline	F	^F508 / ^F508	54	1.10402	G1	homozygous	3	0.279024	2.29032	32.9	31-37	56-60	12	24-60	PAT	AN2
E057	SAMN11251399	PRJNA520924	E	7	31-37	Baseline	F	^F508 / ^F508	53	0.663386	G1	homozygous	5	0.193171	2.54964	60.6667	31-37	56-60	12	24-60	AN2	AN2
E058	SAMN11251400	PRJNA520924	E	7	31-37	Baseline	F	^F508 / ^F508	52	0.201207	G1	homozygous	5	0.0682927	2.9715	72.3889	31-37	56-60	12	24-60	AN2	AN2
E059	SAMN11251401	PRJNA520924	E	7	31-37	Baseline	F	^F508 / ^F508	51	0.543762	G1	homozygous	5	0.150244	2.58439	46.125	31-37	56-60	12	24-60	AN2	AN2
E060	SAMN11251402	PRJNA520924	E	7	31-37	Baseline	F	^F508 / ^F508	50	3.06996	G1	homozygous	3	0.381463	1.77061	62	31-37	51-55	11	24-60	PAT	AN2
E061	SAMN11251403	PRJNA520924	E	7	31-37	Baseline	F	^F508 / ^F508	49	1.13882	G1	homozygous	5	0.24	2.43555	48.5625	31-37	51-55	11	24-60	AN2	AN2
E062	SAMN11251404	PRJNA520924	E	7	31-37	Baseline	F	^F508 / ^F508	48	0.621881	G1	homozygous	5	0.272195	2.52955	48.7857	31-37	51-55	11	24-60	AN2	AN2
E063	SAMN11251405	PRJNA520924	E	7	31-37	Baseline	F	^F508 / ^F508	47	0.302817	G1	homozygous	5	0.0897561	3.07775	65.5455	31-37	51-55	11	24-60	AN2	AN2
E064	SAMN11251406	PRJNA520924	E	7	31-37	Baseline	F	^F508 / ^F508	46	0.148041	G1	homozygous	5	0.0526829	3.14387	86.5	31-37	51-55	11	24-60	AN2	AN2
E065	SAMN11251407	PRJNA520924	E	7	31-37	Baseline	F	^F508 / ^F508	45	1.21687	G1	homozygous	3	0.420488	2.23328	49.5714	31-37	46-50	10	24-60	PAT	AN2
E066	SAMN11251408	PRJNA520924	E	7	31-37	Baseline	F	^F508 / ^F508	44	0.033557	G1	homozygous	5	0.0126829	3.02678	82.2273	31-37	46-50	10	24-60	AN2	AN2
E067	SAMN11251409	PRJNA520924	E	7	31-37	Baseline	F	^F508 / ^F508	43	0.938356	G1	homozygous	5	0.227317	2.54359	54.0625	31-37	46-50	10	24-60	AN2	AN2
E068	SAMN11251410	PRJNA520924	E	7	31-37	Baseline	F	^F508 / ^F508	42	0.381119	G1	homozygous	5	0.152195	3.24703	86.6364	31-37	46-50	10	24-60	AN2	AN2
E069	SAMN11251411	PRJNA520924	E	7	31-37	Baseline	F	^F508 / ^F508	41	0.930886	G1	homozygous	5	0.256585	2.48723	45.125	31-37	46-50	10	24-60	AN2	AN2
E070	SAMN11251412	PRJNA520924	E	7	31-37	Baseline	F	^F508 / ^F508	40	0.296422	G1	homozygous	5	0.133659	2.72295	50	31-37	41-45	9	24-60	AN2	AN2
E071	SAMN11251413	PRJNA520924	E	7	31-37	Baseline	F	^F508 / ^F508	39	0.795501	G1	homozygous	5	0.30439	2.69193	55	31-37	41-45	9	24-60	AN2	AN2
E072	SAMN11251414	PRJNA520924	E	7	31-37	Baseline	F	^F508 / ^F508	38	0.367909	G1	homozygous	5	0.152195	3.02723	81.25	31-37	41-45	9	24-60	AN2	AN2
E073	SAMN11251415	PRJNA520924	E	7	31-37	Baseline	F	^F508 / ^F508	37	0.779592	G1	homozygous	5	0.238049	2.45852	36.5	31-37	41-45	9	24-60	AN2	AN2
E074	SAMN11251416	PRJNA520924	E	7	31-37	Baseline	F	^F508 / ^F508	36	0.901804	G1	homozygous	5	0.238049	2.40596	53.25	31-37	41-45	9	24-60	AN2	AN2
E075	SAMN11251417	PRJNA520924	E	7	31-37	Baseline	F	^F508 / ^F508	35	0.577338	G1	homozygous	5	0.188293	2.49565	41.6667	31-37	36-40	8	24-60	AN2	AN2
E076	SAMN11251418	PRJNA520924	E	7	31-37	Baseline	F	^F508 / ^F508	34	0.232938	G1	homozygous	5	0.0858537	3.06497	67.6429	31-37	36-40	8	24-60	AN2	AN2
E077	SAMN11251419	PRJNA520924	E	7	31-37	Baseline	F	^F508 / ^F508	33	0.703774	G1	homozygous	5	0.182439	2.51906	43.1429	31-37	36-40	8	24-60	AN2	AN2
E078	SAMN11251420	PRJNA520924	E	7	31-37	Baseline	F	^F508 / ^F508	32	0.598198	G1	homozygous	5	0.21561	2.62602	51.6	31-37	36-40	8	24-60	AN2	AN2
E079	SAMN11251422	PRJNA520924	E	7	31-37	Baseline	F	^F508 / ^F508	28	0.298271	G1	homozygous	5	0.171707	2.67926	51.6	31-37	31-35	7	24-60	AN2	AN2
E080	SAMN11251423	PRJNA520924	E	7	31-37	Baseline	F	^F508 / ^F508	27	0.281506	G1	homozygous	5	0.0995122	3.21141	88.3846	31-37	31-35	7	24-60	AN2	AN2
E081	SAMN11251424	PRJNA520924	E	7	31-37	Baseline	F	^F508 / ^F508	26	0.976242	G1	homozygous	5	0.308293	2.59207	52.3333	31-37	31-35	7	24-60	AN2	AN2
E082	SAMN11251425	PRJNA520924	E	7	31-37	Baseline	F	^F508 / ^F508	25	0.719697	G1	homozygous	5	0.205854	2.87693	57.0417	31-37	26-30	6	24-60	AN2	AN2
E083	SAMN11251426	PRJNA520924	E	7	31-37	Baseline	F	^F508 / ^F508	24	0.965443	G1	homozygous	5	0.251707	2.26814	56.25	31-37	26-30	6	24-60	AN2	AN2
E084	SAMN11251427	PRJNA520924	E	7	31-37	Baseline	F	^F508 / ^F508	23	0.745318	G1	homozygous	5	0.345366	2.42863	43.5714	31-37	26-30	6	24-60	AN2	AN2
E085	SAMN11251428	PRJNA520924	E	7	31-37	Baseline	F	^F508 / ^F508	22	0.906188	G1	homozygous	5	0.300488	2.56767	42.75	31-37	26-30	6	24-60	AN2	AN2
E086	SAMN11251429	PRJNA520924	E	7	31-37	Baseline	F	^F508 / ^F508	21	0.181962	G1	homozygous	5	0.075122	3.00111	74.0833	31-37	26-30	6	24-60	AN2	AN2
E087	SAMN11251430	PRJNA520924	E	7	31-37	Baseline	F	^F508 / ^F508	20	0.915254	G1	homozygous	5	0.291707	2.71355	63.75	31-37	21-25	5	24-60	AN2	AN2
E088	SAMN11251431	PRJNA520924	E	7	31-37	Baseline	F	^F508 / ^F508	19	0.582343	G1	homozygous	5	0.281951	2.54785	48.1667	31-37	21-25	5	24-60	AN2	AN2
E089	SAMN11251432	PRJNA520924	E	7	31-37	Baseline	F	^F508 / ^F508	18	0.65942	G1	homozygous	5	0.274146	2.72939	62.75	31-37	21-25	5	<24	AN2	AN2
E090	SAMN11251433	PRJNA520924	E	7	31-37	Baseline	F	^F508 / ^F508	17	0.32084	G1	homozygous	5	0.143415	3.32167	66	31-37	21-25	5	<24	AN2	AN2
E091	SAMN11251434	PRJNA520924	E	7	31-37	Baseline	F	^F508 / ^F508	16	0.395706	G1	homozygous	5	0.134634	2.47153	39	31-37	21-25	5	<24	AN2	AN2
E092	SAMN35883317	PRJNA987026	E	7	31-37	Exacerbation	F	^F508 / ^F508	13	2.31179	G1	homozygous	3	0.39122	2.04929	37	31-37	16-20	4	<24	PAT	AN2
E093	SAMN35883318	PRJNA987026	E	7	31-37	Exacerbation	F	^F508 / ^F508	12	1.72203	G1	homozygous	3	0.298537	2.4622	33.6667	31-37	16-20	4	<24	PAT	AN2
E094	SAMN35883319	PRJNA987026	E	7	31-37	Exacerbation	F	^F508 / ^F508	11	1.19382	G1	homozygous	5	0.352195	2.33341	38.125	31-37	16-20	4	<24	AN2	AN2
E095	SAMN35883320	PRJNA987026	E	7	31-37	Exacerbation	F	^F508 / ^F508	10	0.75	G1	homozygous	5	0.282927	2.68828	46.4	31-37	11-15	3	<24	AN2	AN2
E096	SAMN35883321	PRJNA987026	E	7	31-37	Exacerbation	F	^F508 / ^F508	9	0.235977	G1	homozygous	5	0.0712195	3.09721	72	31-37	11-15	3	<24	AN2	AN2
E097	SAMN35883322	PRJNA987026	E	7	31-37	Exacerbation	F	^F508 / ^F508	8	1.65831	G1	homozygous	3	0.322927	2.24825	35	31-37	11-15	3	<24	PAT	AN2
E098	SAMN35883323	PRJNA987026	E	7	31-37	Exacerbation	F	^F508 / ^F508	7	1.77644	G1	homozygous	3	0.357073	2.22772	51	31-37	11-15	3	<24	PAT	AN2
E099	SAMN35883324	PRJNA987026	E	7	31-37	Exacerbation	F	^F508 / ^F508	6	0.916067	G1	homozygous	5	0.29561	2.65354	37.6667	31-37	11-15	3	<24	AN2	AN2
E100	SAMN35883325	PRJNA987026	E	7	31-37	Exacerbation	F	^F508 / ^F508	5	0.791762	G1	homozygous	5	0.256585	2.69617	45.125	31-37	6-10	2	<24	AN2	AN2
E101	SAMN35883326	PRJNA987026	E	7	31-37	Exacerbation	F	^F508 / ^F508	4	1.9682	G1	homozygous	3	0.439024	1.8705	30	31-37	6-10	2	<24	PAT	AN2
E102	SAMN35883327	PRJNA987026	E	7	31-37	Exacerbation	F	^F508 / ^F508	3	1.27596	G1	homozygous	5	0.219512	2.4839	50.1	31-37	6-10	2	<24	AN2	AN2
E103	SAMN35883328	PRJNA987026	E	7	31-37	Exacerbation	F	^F508 / ^F508	2	2.4	G1	homozygous	3	0.357073	2.04533	39.5	31-37	6-10	2	<24	PAT	AN2
E104	SAMN35883329	PRJNA987026	E	8	31-37	Baseline	F	^F508 / ^F508	59	0.110028	G1	homozygous	5	0.0497561	3.04306	57.9	31-37	56-60	12	24-60	AN2	NA
E105	SAMN35883330	PRJNA987026	E	8	31-37	Baseline	F	^F508 / ^F508	58	0.55719	G1	homozygous	5	0.234146	2.3974	39.1667	31-37	56-60	12	24-60	AN2	NA
E106	SAMN35883331	PRJNA987026	E	8	31-37	Baseline	F	^F508 / ^F508	57	0.949495	G1	homozygous	5	0.25561	2.23241	35.5	31-37	56-60	12	24-60	AN2	NA
E107	SAMN35883332	PRJNA987026	E	8	31-37	Baseline	F	^F508 / ^F508	56	0.496644	G1	homozygous	5	0.187317	2.46079	33	31-37	56-60	12	24-60	AN2	NA
E108	SAMN35883333	PRJNA987026	E	8	31-37	Baseline	F	^F508 / ^F508	55	0.923256	G1	homozygous	3	0.2	2.23669	23	31-37	51-55	11	24-60	AN2	NA
E109	SAMN35883334	PRJNA987026	E	8	31-37	Baseline	F	^F508 / ^F508	54	0.311419	G1	homozygous	5	0.0985366	2.71985	28	31-37	51-55	11	24-60	AN1	NA
E110	SAMN35883335	PRJNA987026	E	8	31-37	Baseline	F	^F508 / ^F508	51	1.67178	G1	homozygous	3	0.336585	2.09695	19	31-37	51-55	11	24-60	PAT	NA
E111	SAMN35883336	PRJNA987026	E	8	31-37	Baseline	F	^F508 / ^F508	50	0.0742424	G1	homozygous	5	0.0360976	2.94508	48.9	31-37	46-50	10	24-60	AN2	NA
E112	SAMN35883337	PRJNA987026	E	8	31-37	Baseline	F	^F508 / ^F508	49	0.227124	G1	homozygous	5	0.109268	2.43035	39	31-37	46-50	10	24-60	AN2	NA
E113	SAMN35883338	PRJNA987026	E	8	31-37	Baseline	F	^F508 / ^F508	48	0.472	G1	homozygous	5	0.180488	2.46889	41	31-37	46-50	10	24-60	AN2	NA
E114	SAMN35883339	PRJNA987026	E	8	31-37	Baseline	F	^F508 / ^F508	45	0.710938	G1	homozygous	5	0.246829	2.09373	45	31-37	41-45	9	24-60	AN2	NA
E115	SAMN35883340	PRJNA987026	E	8	31-37	Baseline	F	^F508 / ^F508	44	0.624535	G1	homozygous	5	0.16878	2.17953	61	31-37	41-45	9	24-60	AN2	NA
E116	SAMN35883341	PRJNA987026	E	8	31-37	Baseline	F	^F508 / ^F508	43	0.210145	G1	homozygous	5	0.0887805	2.07214	54.1667	31-37	41-45	9	24-60	AN2	NA
E117	SAMN35883342	PRJNA987026	E	8	31-37	Baseline	F	^F508 / ^F508	39	0.208696	G1	homozygous	5	0.0829268	2.55248	43.25	31-37	36-40	8	24-60	AN2	NA
E118	SAMN35883343	PRJNA987026	E	8	31-37	Baseline	F	^F508 / ^F508	38	0.112637	G1	homozygous	5	0.0770732	2.71794	54.6667	31-37	36-40	8	24-60	AN2	NA
E119	SAMN35883344	PRJNA987026	E	8	31-37	Baseline	F	^F508 / ^F508	37	0.554237	G1	homozygous	5	0.204878	2.3284	42.0833	31-37	36-40	8	24-60	AN2	NA
E120	SAMN35883345	PRJNA987026	E	8	31-37	Baseline	F	^F508 / ^F508	36	0.247136	G1	homozygous	5	0.133659	2.33918	26	31-37	36-40	8	24-60	AN1	NA
E121	SAMN35883346	PRJNA987026	E	8	31-37	Baseline	F	^F508 / ^F508	35	0.52583	G1	homozygous	5	0.15122	2.68672	35.75	31-37	31-35	7	24-60	AN2	NA
E122	SAMN35883347	PRJNA987026	E	8	31-37	Baseline	F	^F508 / ^F508	34	0.260553	G1	homozygous	5	0.0878049	2.26843	33.6	31-37	31-35	7	24-60	AN2	NA
E123	SAMN35883348	PRJNA987026	E	8	31-37	Baseline	F	^F508 / ^F508	31	0.565766	G1	homozygous	5	0.189268	2.41281	41.9	31-37	31-35	7	24-60	AN2	NA
E124	SAMN35883349	PRJNA987026	E	8	31-37	Baseline	F	^F508 / ^F508	28	0.870044	G1	homozygous	5	0.236098	2.6704	61	31-37	26-30	6	24-60	AN2	NA
E125	SAMN35883350	PRJNA987026	E	8	31-37	Baseline	F	^F508 / ^F508	27	1.00879	G1	homozygous	3	0.26439	2.05138	35.1667	31-37	26-30	6	24-60	PAT	NA
E126	SAMN35883351	PRJNA987026	E	8	31-37	Baseline	F	^F508 / ^F508	26	2.76628	G1	homozygous	3	0.510244	1.49719	18	31-37	26-30	6	24-60	PAT	NA
E127	SAMN35883352	PRJNA987026	E	8	31-37	Baseline	F	^F508 / ^F508	25	0.84696	G1	homozygous	5	0.241951	2.11902	26.25	31-37	21-25	5	24-60	AN1	NA
E128	SAMN35883353	PRJNA987026	E	8	31-37	Baseline	F	^F508 / ^F508	24	0.509921	G1	homozygous	5	0.228293	2.21197	29.25	31-37	21-25	5	24-60	AN2	NA
E129	SAMN35883354	PRJNA987026	E	8	31-37	Baseline	F	^F508 / ^F508	17	0.277941	G1	homozygous	5	0.120976	2.23524	28.6	31-37	16-20	4	<24	AN1	NA
E130	SAMN35883355	PRJNA987026	E	8	31-37	Baseline	F	^F508 / ^F508	16	0.104895	G1	homozygous	5	0.0614634	2.2545	41.25	31-37	16-20	4	<24	AN2	NA
E131	SAMN35883356	PRJNA987026	E	8	31-37	Baseline	F	^F508 / ^F508	15	2.71484	G1	homozygous	3	0.572683	1.45921	13	31-37	11-15	3	<24	PAT	NA
E132	SAMN35883357	PRJNA987026	E	8	31-37	Exacerbation	F	^F508 / ^F508	14	0.895652	G1	homozygous	5	0.296585	1.94103	16	31-37	11-15	3	<24	AN1	NA
E133	SAMN35883358	PRJNA987026	E	8	31-37	Exacerbation	F	^F508 / ^F508	13	1.95062	G1	homozygous	3	0.536585	1.47761	14.5	31-37	11-15	3	<24	PAT	NA
E134	SAMN35883359	PRJNA987026	E	8	31-37	Exacerbation	F	^F508 / ^F508	12	1.58529	G1	homozygous	3	0.396098	1.91565	19	31-37	11-15	3	<24	PAT	NA
E135	SAMN35883360	PRJNA987026	E	8	31-37	Exacerbation	F	^F508 / ^F508	9	1.51036	G1	homozygous	3	0.466341	1.60757	15	31-37	6-10	2	<24	PAT	NA
E136	SAMN35883361	PRJNA987026	E	8	31-37	Exacerbation	F	^F508 / ^F508	8	0.401327	G1	homozygous	5	0.19122	2.21969	27.6667	31-37	6-10	2	<24	AN1	NA
E137	SAMN35883362	PRJNA987026	E	8	31-37	Exacerbation	F	^F508 / ^F508	7	0.886831	G1	homozygous	5	0.233171	2.38752	31.6	31-37	6-10	2	<24	AN2	NA
E138	SAMN35883363	PRJNA987026	E	8	31-37	Exacerbation	F	^F508 / ^F508	6	1.82507	G1	homozygous	3	0.443902	1.80067	22	31-37	6-10	2	<24	PAT	NA
E139	SAMN35883364	PRJNA987026	E	8	31-37	Exacerbation	F	^F508 / ^F508	5	1.37931	G1	homozygous	3	0.357073	1.81593	22.25	31-37	1-5	1	<24	PAT	NA
E140	SAMN35883365	PRJNA987026	E	8	31-37	Exacerbation	F	^F508 / ^F508	4	0.653501	G1	homozygous	5	0.283902	1.95264	19.25	31-37	1-5	1	<24	AN1	NA
E141	SAMN35883366	PRJNA987026	E	8	31-37	Exacerbation	F	^F508 / ^F508	3	0.243156	G1	homozygous	5	0.0741463	2.75037	43.25	31-37	1-5	1	<24	AN2	NA
E142	SAMN35883367	PRJNA987026	E	8	31-37	Exacerbation	F	^F508 / ^F508	2	0.588768	G1	homozygous	5	0.300488	2.17582	37.9	31-37	1-5	1	<24	AN2	NA
E143	SAMN35883368	PRJNA987026	E	8	31-37	Exacerbation	F	^F508 / ^F508	1	1.0431	G1	homozygous	3	0.293659	1.99375	25.25	31-37	1-5	1	<24	PAT	NA
F001	SAMN35883369	PRJNA987026	F	9	<31	Baseline	M	^F508 / not identified	59	0.247678	not dentified	not identified	5	0.156098	2.60755	40	<31	56-60	12	24-60	AN2	AN2
F002	SAMN35883370	PRJNA987026	F	9	<31	Baseline	M	^F508 / not identified	56	0.102564	not dentified	not identified	5	0.0780488	2.26353	34.1667	<31	56-60	12	24-60	AN2	AN2
F003	SAMN35883371	PRJNA987026	F	9	<31	Baseline	M	^F508 / not identified	55	0.197128	not dentified	not identified	5	0.147317	2.20363	21	<31	51-55	11	24-60	AN1	AN2
F004	SAMN35883372	PRJNA987026	F	9	<31	Baseline	M	^F508 / not identified	54	0.316932	not dentified	not identified	5	0.213659	1.65135	24.25	<31	51-55	11	24-60	AN1	AN2
F005	SAMN35883373	PRJNA987026	F	9	<31	Baseline	M	^F508 / not identified	53	0.215022	not dentified	not identified	5	0.142439	2.41864	33	<31	51-55	11	24-60	AN2	AN2
F006	SAMN35883374	PRJNA987026	F	9	<31	Baseline	M	^F508 / not identified	52	0.238985	not dentified	not identified	5	0.174634	1.81192	32	<31	51-55	11	24-60	AN2	AN2
F007	SAMN35883375	PRJNA987026	F	9	<31	Baseline	M	^F508 / not identified	51	0.397496	not dentified	not identified	5	0.247805	1.96959	19	<31	51-55	11	24-60	AN1	AN2
F008	SAMN35883376	PRJNA987026	F	9	<31	Baseline	M	^F508 / not identified	50	0.405941	not dentified	not identified	5	0.28	1.56376	16	<31	46-50	10	24-60	AN1	AN2
F009	SAMN35883377	PRJNA987026	F	9	<31	Baseline	M	^F508 / not identified	49	0.301205	not dentified	not identified	5	0.195122	2.28562	39.0833	<31	46-50	10	24-60	AN2	AN2
F010	SAMN35883378	PRJNA987026	F	9	<31	Baseline	M	^F508 / not identified	48	0.434109	not dentified	not identified	5	0.273171	1.9615	21	<31	46-50	10	24-60	AN1	AN2
F011	SAMN35883379	PRJNA987026	F	9	<31	Baseline	M	^F508 / not identified	45	0.178404	not dentified	not identified	5	0.11122	2.62935	40.3333	<31	41-45	9	24-60	AN2	AN2
F012	SAMN35883380	PRJNA987026	F	9	<31	Baseline	M	^F508 / not identified	44	0.318797	not dentified	not identified	5	0.206829	2.38487	34.4	<31	41-45	9	24-60	AN2	AN2
F013	SAMN35883381	PRJNA987026	F	9	<31	Baseline	M	^F508 / not identified	40	0.150281	not dentified	not identified	5	0.10439	2.65812	49.75	<31	36-40	8	24-60	AN2	AN2
F014	SAMN35883382	PRJNA987026	F	9	<31	Baseline	M	^F508 / not identified	39	0.515913	not dentified	not identified	5	0.300488	2.27374	40.9	<31	36-40	8	24-60	AN2	AN2
F015	SAMN35883383	PRJNA987026	F	9	<31	Baseline	M	^F508 / not identified	38	0.201657	not dentified	not identified	5	0.142439	2.2214	36.1667	<31	36-40	8	24-60	AN2	AN2
F016	SAMN35883384	PRJNA987026	F	9	<31	Baseline	M	^F508 / not identified	37	0.650709	not dentified	not identified	5	0.358049	1.73091	20	<31	36-40	8	24-60	AN1	AN2
F017	SAMN35883385	PRJNA987026	F	9	<31	Baseline	M	^F508 / not identified	34	0.326648	not dentified	not identified	5	0.222439	1.93662	22.0833	<31	31-35	7	24-60	AN1	AN2
F018	SAMN35883386	PRJNA987026	F	9	<31	Baseline	M	^F508 / not identified	33	0.127301	not dentified	not identified	5	0.0809756	2.93517	49.125	<31	31-35	7	24-60	AN2	AN2
F019	SAMN35883387	PRJNA987026	F	9	<31	Baseline	M	^F508 / not identified	30	0.181686	not dentified	not identified	5	0.121951	2.511	27	<31	26-30	6	24-60	AN1	AN2
F020	SAMN35883388	PRJNA987026	F	9	<31	Baseline	M	^F508 / not identified	27	0.262537	not dentified	not identified	5	0.173659	2.6145	33	<31	26-30	6	24-60	AN2	AN2
F021	SAMN35883389	PRJNA987026	F	9	<31	Baseline	M	^F508 / not identified	26	0.728346	not dentified	not identified	5	0.360976	2.52373	42.6667	<31	26-30	6	24-60	AN2	AN2
F022	SAMN35883390	PRJNA987026	F	9	<31	Baseline	M	^F508 / not identified	25	0.230986	not dentified	not identified	5	0.16	2.6751	37.125	<31	21-25	5	24-60	AN2	AN2
F023	SAMN35883391	PRJNA987026	F	9	<31	Baseline	M	^F508 / not identified	24	0.53068	not dentified	not identified	5	0.312195	2.2096	27.25	<31	21-25	5	24-60	AN2	AN2
F024	SAMN35883392	PRJNA987026	F	9	<31	Baseline	M	^F508 / not identified	23	0.221614	not dentified	not identified	5	0.158049	2.5078	31	<31	21-25	5	<24	AN2	AN2
F025	SAMN35883393	PRJNA987026	F	9	<31	Baseline	M	^F508 / not identified	22	0.253672	not dentified	not identified	5	0.185366	2.40411	33.125	<31	21-25	5	<24	AN2	AN2
F026	SAMN35883394	PRJNA987026	F	9	<31	Baseline	M	^F508 / not identified	18	0.381026	not dentified	not identified	5	0.239024	2.20231	29.3333	<31	16-20	4	<24	AN2	AN2
F027	SAMN35883395	PRJNA987026	F	9	<31	Baseline	M	^F508 / not identified	17	0.106061	not dentified	not identified	5	0.0682927	2.98539	46.6429	<31	16-20	4	<24	AN2	AN2
F028	SAMN35883396	PRJNA987026	F	9	<31	Baseline	M	^F508 / not identified	16	0.322449	not dentified	not identified	5	0.23122	1.68698	27.5	<31	16-20	4	<24	AN1	AN2
F029	SAMN35883397	PRJNA987026	F	9	<31	Exacerbation	M	^F508 / not identified	12	0.237263	not dentified	not identified	5	0.159024	2.35108	36.125	<31	11-15	3	<24	AN2	AN2
F030	SAMN35883398	PRJNA987026	F	9	<31	Exacerbation	M	^F508 / not identified	11	0.247117	not dentified	not identified	5	0.146341	2.81814	45.125	<31	11-15	3	<24	AN2	AN2
F031	SAMN35883399	PRJNA987026	F	9	<31	Exacerbation	M	^F508 / not identified	10	0.347496	not dentified	not identified	5	0.223415	1.99412	30.2857	<31	6-10	2	<24	AN2	AN2
F032	SAMN35883400	PRJNA987026	F	9	<31	Exacerbation	M	^F508 / not identified	9	0.306886	not dentified	not identified	5	0.2	2.36303	37.6	<31	6-10	2	<24	AN2	AN2
F033	SAMN35883401	PRJNA987026	F	9	<31	Exacerbation	M	^F508 / not identified	8	0.402402	not dentified	not identified	5	0.261463	1.85784	17.25	<31	6-10	2	<24	AN1	AN2
F034	SAMN35883402	PRJNA987026	F	9	<31	Exacerbation	M	^F508 / not identified	7	0.189445	not dentified	not identified	5	0.136585	2.21264	31.5	<31	6-10	2	<24	AN2	AN2
F035	SAMN35883403	PRJNA987026	F	9	<31	Exacerbation	M	^F508 / not identified	4	0.102696	not dentified	not identified	5	0.0780488	2.43192	36.3333	<31	1-5	1	<24	AN2	AN2
F036	SAMN35883404	PRJNA987026	F	9	<31	Exacerbation	M	^F508 / not identified	3	0.189153	not dentified	not identified	5	0.139512	2.04222	25.6667	<31	1-5	1	<24	AN1	AN2
F037	SAMN35883405	PRJNA987026	F	9	<31	Exacerbation	M	^F508 / not identified	2	0.255495	not dentified	not identified	5	0.181463	2.12278	30.6667	<31	1-5	1	<24	AN2	AN2
G001	SAMN35883418	PRJNA987026	G	11	31-37	Baseline	M	^F508 / 3849+10kbC>T	58	1.14786	G2	heterozygous	2	0.229268	2.01769	19	31-37	56-60	12	24-60	PAT	PAT
G002	SAMN35883419	PRJNA987026	G	11	31-37	Baseline	M	^F508 / 3849+10kbC>T	54	50.05	G2	heterozygous	1	0.955122	0.254125	11	31-37	51-55	11	24-60	PAT	PAT
G003	SAMN35883420	PRJNA987026	G	11	31-37	Baseline	M	^F508 / 3849+10kbC>T	53	10.7262	G2	heterozygous	1	0.851707	0.708056	13.1667	31-37	51-55	11	24-60	PAT	PAT
G004	SAMN35883421	PRJNA987026	G	11	31-37	Baseline	M	^F508 / 3849+10kbC>T	52	10.325	G2	heterozygous	3	0.65561	1.25244	19	31-37	51-55	11	24-60	PAT	PAT
G005	SAMN35883422	PRJNA987026	G	11	31-37	Baseline	M	^F508 / 3849+10kbC>T	51	17.0179	G2	heterozygous	1	0.901463	0.51561	13	31-37	51-55	11	24-60	PAT	PAT
G006	SAMN35883423	PRJNA987026	G	11	31-37	Baseline	M	^F508 / 3849+10kbC>T	50	10.2674	G2	heterozygous	1	0.770732	1.00316	19.6667	31-37	51-55	11	24-60	PAT	PAT
G007	SAMN35883424	PRJNA987026	G	11	31-37	Baseline	M	^F508 / 3849+10kbC>T	49	19.6809	G2	heterozygous	1	0.85561	0.68628	12.5	31-37	46-50	10	24-60	PAT	PAT
G008	SAMN35883425	PRJNA987026	G	11	31-37	Baseline	M	^F508 / 3849+10kbC>T	48	49.3684	G2	heterozygous	1	0.556098	1.06504	10	31-37	46-50	10	24-60	PAT	PAT
G009	SAMN35883426	PRJNA987026	G	11	31-37	Baseline	M	^F508 / 3849+10kbC>T	47	5.95385	G2	heterozygous	3	0.746341	1.19725	34.5	31-37	46-50	10	24-60	PAT	PAT
G010	SAMN35883427	PRJNA987026	G	11	31-37	Baseline	M	^F508 / 3849+10kbC>T	46	10.6104	G2	heterozygous	3	0.789268	0.983567	16.25	31-37	46-50	10	24-60	PAT	PAT
G011	SAMN35883428	PRJNA987026	G	11	31-37	Baseline	M	^F508 / 3849+10kbC>T	45	14.5469	G2	heterozygous	1	0.882927	0.629788	29	31-37	46-50	10	24-60	PAT	PAT
G012	SAMN35883429	PRJNA987026	G	11	31-37	Baseline	M	^F508 / 3849+10kbC>T	44	37	G2	heterozygous	1	0.851707	0.727264	14.6667	31-37	41-45	9	24-60	PAT	PAT
G013	SAMN35883430	PRJNA987026	G	11	31-37	Baseline	M	^F508 / 3849+10kbC>T	43	29.75	G2	heterozygous	1	0.803902	0.759981	12	31-37	41-45	9	24-60	PAT	PAT
G014	SAMN35883431	PRJNA987026	G	11	31-37	Baseline	M	^F508 / 3849+10kbC>T	42	2.48768	G2	heterozygous	3	0.483902	2.06291	35.1429	31-37	41-45	9	24-60	PAT	PAT
G015	SAMN35883432	PRJNA987026	G	11	31-37	Baseline	M	^F508 / 3849+10kbC>T	41	27.5714	G2	heterozygous	1	0.829268	0.690303	14	31-37	41-45	9	24-60	PAT	PAT
G016	SAMN35883433	PRJNA987026	G	11	31-37	Baseline	M	^F508 / 3849+10kbC>T	40	5.27333	G2	heterozygous	3	0.729756	1.28147	20	31-37	41-45	9	24-60	PAT	PAT
G017	SAMN35883434	PRJNA987026	G	11	31-37	Baseline	M	^F508 / 3849+10kbC>T	39	54.1111	G2	heterozygous	1	0.643902	0.902831	13.1667	31-37	36-40	8	24-60	PAT	PAT
G018	SAMN35883435	PRJNA987026	G	11	31-37	Baseline	M	^F508 / 3849+10kbC>T	38	3.64925	G2	heterozygous	2	0.27122	2.31634	34.125	31-37	36-40	8	24-60	PAT	PAT
G019	SAMN35883436	PRJNA987026	G	11	31-37	Baseline	M	^F508 / 3849+10kbC>T	37	3.50932	G2	heterozygous	3	0.517073	2.01875	29	31-37	36-40	8	24-60	PAT	PAT
G020	SAMN35883437	PRJNA987026	G	11	31-37	Baseline	M	^F508 / 3849+10kbC>T	36	2.72642	G2	heterozygous	3	0.498537	2.06872	40	31-37	36-40	8	24-60	PAT	PAT
G021	SAMN35883438	PRJNA987026	G	11	31-37	Baseline	M	^F508 / 3849+10kbC>T	35	2.67401	G2	heterozygous	3	0.494634	2.01507	23.5	31-37	36-40	8	24-60	PAT	PAT
G022	SAMN35883439	PRJNA987026	G	11	31-37	Baseline	M	^F508 / 3849+10kbC>T	34	4.73026	G2	heterozygous	3	0.612683	1.66266	29	31-37	31-35	7	24-60	PAT	PAT
G023	SAMN35883440	PRJNA987026	G	11	31-37	Baseline	M	^F508 / 3849+10kbC>T	33	0.428986	G2	heterozygous	5	0.123902	2.79934	33	31-37	31-35	7	24-60	AN2	PAT
G024	SAMN35883441	PRJNA987026	G	11	31-37	Baseline	M	^F508 / 3849+10kbC>T	32	11.9861	G2	heterozygous	1	0.786341	1.06997	22	31-37	31-35	7	24-60	PAT	PAT
G025	SAMN35883442	PRJNA987026	G	11	31-37	Baseline	M	^F508 / 3849+10kbC>T	31	51.8333	G2	heterozygous	1	0.742439	0.88414	9	31-37	31-35	7	24-60	PAT	PAT
G026	SAMN35883443	PRJNA987026	G	11	31-37	Baseline	M	^F508 / 3849+10kbC>T	30	0.797753	G2	heterozygous	2	0.178537	2.92059	38.1667	31-37	31-35	7	24-60	PAT	PAT
G027	SAMN35883444	PRJNA987026	G	11	31-37	Baseline	M	^F508 / 3849+10kbC>T	29	1.44	G2	heterozygous	2	0.211707	2.66097	28	31-37	26-30	6	24-60	PAT	PAT
G028	SAMN35883445	PRJNA987026	G	11	31-37	Baseline	M	^F508 / 3849+10kbC>T	28	2.11312	G2	heterozygous	3	0.329756	2.47944	29.5	31-37	26-30	6	24-60	PAT	PAT
G029	SAMN35883446	PRJNA987026	G	11	31-37	Baseline	M	^F508 / 3849+10kbC>T	27	5.6259	G2	heterozygous	3	0.64878	1.48869	26.6667	31-37	26-30	6	24-60	PAT	PAT
G030	SAMN35883447	PRJNA987026	G	11	31-37	Baseline	M	^F508 / 3849+10kbC>T	26	12.8906	G2	heterozygous	3	0.710244	1.30386	28	31-37	26-30	6	24-60	PAT	PAT
G031	SAMN35883448	PRJNA987026	G	11	31-37	Baseline	M	^F508 / 3849+10kbC>T	25	2.9641	G2	heterozygous	3	0.436098	2.17965	28.6667	31-37	26-30	6	24-60	PAT	PAT
G032	SAMN35883449	PRJNA987026	G	11	31-37	Baseline	M	^F508 / 3849+10kbC>T	24	1.00348	G2	heterozygous	5	0.221463	2.82101	39.0625	31-37	21-25	5	24-60	AN2	PAT
G033	SAMN35883450	PRJNA987026	G	11	31-37	Baseline	M	^F508 / 3849+10kbC>T	23	2.06038	G2	heterozygous	3	0.434146	2.31243	38.3333	31-37	21-25	5	24-60	PAT	PAT
G034	SAMN35883451	PRJNA987026	G	11	31-37	Baseline	M	^F508 / 3849+10kbC>T	22	2.19203	G2	heterozygous	3	0.507317	1.99756	34	31-37	21-25	5	<24	PAT	PAT
G035	SAMN35883452	PRJNA987026	G	11	31-37	Baseline	M	^F508 / 3849+10kbC>T	21	16.2105	G2	heterozygous	1	0.755122	0.948147	15	31-37	21-25	5	<24	PAT	PAT
G036	SAMN35883453	PRJNA987026	G	11	31-37	Baseline	M	^F508 / 3849+10kbC>T	20	32.2333	G2	heterozygous	1	0.866341	0.623725	35	31-37	21-25	5	<24	PAT	PAT
G037	SAMN35883454	PRJNA987026	G	11	31-37	Baseline	M	^F508 / 3849+10kbC>T	19	4.75148	G2	heterozygous	3	0.613659	1.32927	14.25	31-37	16-20	4	<24	PAT	PAT
G038	SAMN35883455	PRJNA987026	G	11	31-37	Baseline	M	^F508 / 3849+10kbC>T	18	2.99107	G2	heterozygous	3	0.521951	1.77138	21	31-37	16-20	4	<24	PAT	PAT
G039	SAMN35883456	PRJNA987026	G	11	31-37	Baseline	M	^F508 / 3849+10kbC>T	17	33.6897	G2	heterozygous	1	0.90439	0.458632	10.1667	31-37	16-20	4	<24	PAT	PAT
G040	SAMN35883457	PRJNA987026	G	11	31-37	Baseline	M	^F508 / 3849+10kbC>T	16	31.7097	G2	heterozygous	1	0.894634	0.477755	9	31-37	16-20	4	<24	PAT	PAT
G041	SAMN35883458	PRJNA987026	G	11	31-37	Baseline	M	^F508 / 3849+10kbC>T	15	24.0769	G2	heterozygous	1	0.77561	0.890509	21.6667	31-37	16-20	4	<24	PAT	PAT
G042	SAMN35883459	PRJNA987026	G	11	31-37	Exacerbation	M	^F508 / 3849+10kbC>T	14	3.6	G2	heterozygous	3	0.684878	1.22043	17.25	31-37	11-15	3	<24	PAT	PAT
G043	SAMN35883460	PRJNA987026	G	11	31-37	Exacerbation	M	^F508 / 3849+10kbC>T	13	21.4889	G2	heterozygous	1	0.90439	0.468865	10	31-37	11-15	3	<24	PAT	PAT
G044	SAMN35883461	PRJNA987026	G	11	31-37	Exacerbation	M	^F508 / 3849+10kbC>T	10	110.889	G2	heterozygous	1	0.879024	0.467172	15	31-37	11-15	3	<24	PAT	PAT
G045	SAMN35883462	PRJNA987026	G	11	31-37	Exacerbation	M	^F508 / 3849+10kbC>T	9	7.34545	G2	heterozygous	3	0.756098	1.05093	19	31-37	6-10	2	<24	PAT	PAT
G046	SAMN35883463	PRJNA987026	G	11	31-37	Exacerbation	M	^F508 / 3849+10kbC>T	8	4.20238	G2	heterozygous	3	0.651707	1.30147	21.5	31-37	6-10	2	<24	PAT	PAT
G047	SAMN35883464	PRJNA987026	G	11	31-37	Exacerbation	M	^F508 / 3849+10kbC>T	7	8.90099	G2	heterozygous	1	0.830244	0.79272	19	31-37	6-10	2	<24	PAT	PAT
G048	SAMN35883465	PRJNA987026	G	11	31-37	Exacerbation	M	^F508 / 3849+10kbC>T	6	13.0563	G2	heterozygous	1	0.764878	0.880854	15.5	31-37	6-10	2	<24	PAT	PAT
G049	SAMN35883466	PRJNA987026	G	11	31-37	Exacerbation	M	^F508 / 3849+10kbC>T	5	6.98361	G2	heterozygous	1	0.790244	0.959703	24.25	31-37	6-10	2	<24	PAT	PAT
G050	SAMN35883467	PRJNA987026	G	11	31-37	Exacerbation	M	^F508 / 3849+10kbC>T	4	11.0964	G2	heterozygous	1	0.847805	0.696464	17	31-37	1-5	1	<24	PAT	PAT
G051	SAMN35883468	PRJNA987026	G	11	31-37	Exacerbation	M	^F508 / 3849+10kbC>T	3	11.0132	G2	heterozygous	3	0.789268	0.911346	11	31-37	1-5	1	<24	PAT	PAT
H001	SAMN35883469	PRJNA987026	H	12	<31	Baseline	F	^F508 / ^F508	59	0.204756	G1	homozygous	5	0.15122	1.95827	21	<31	56-60	12	24-60	AN1	NA
H002	SAMN35883470	PRJNA987026	H	12	<31	Baseline	F	^F508 / ^F508	58	0.349275	G1	homozygous	5	0.235122	1.92904	21.25	<31	56-60	12	24-60	AN1	NA
H003	SAMN35883471	PRJNA987026	H	12	<31	Baseline	F	^F508 / ^F508	57	0.350318	G1	homozygous	5	0.214634	2.26377	26	<31	56-60	12	24-60	AN1	NA
H004	SAMN35883472	PRJNA987026	H	12	<31	Baseline	F	^F508 / ^F508	56	0.808559	G1	homozygous	5	0.350244	2.16583	26.25	<31	56-60	12	24-60	AN2	NA
H005	SAMN35883473	PRJNA987026	H	12	<31	Baseline	F	^F508 / ^F508	55	0.963235	G1	homozygous	5	0.383415	2.04134	29	<31	51-55	11	24-60	AN2	NA
H006	SAMN35883474	PRJNA987026	H	12	<31	Baseline	F	^F508 / ^F508	48	0.797802	G1	homozygous	5	0.354146	2.11534	37	<31	46-50	10	24-60	AN2	NA
H007	SAMN35883475	PRJNA987026	H	12	<31	Baseline	F	^F508 / ^F508	47	1.07013	G1	homozygous	5	0.401951	2.14242	33.5	<31	46-50	10	24-60	AN2	NA
H008	SAMN35883476	PRJNA987026	H	12	<31	Baseline	F	^F508 / ^F508	46	0.0747922	G1	homozygous	5	0.0526829	2.38159	35.25	<31	46-50	10	24-60	AN2	NA
H009	SAMN35883477	PRJNA987026	H	12	<31	Baseline	F	^F508 / ^F508	45	0.322239	G1	homozygous	5	0.207805	2.2701	33.5	<31	41-45	9	24-60	AN2	NA
H010	SAMN35883478	PRJNA987026	H	12	<31	Baseline	F	^F508 / ^F508	44	1.2933	G1	homozygous	3	0.451707	1.79572	20.1667	<31	41-45	9	24-60	PAT	NA
H011	SAMN35883479	PRJNA987026	H	12	<31	Baseline	F	^F508 / ^F508	43	0.305556	G1	homozygous	5	0.193171	1.90091	21.125	<31	41-45	9	24-60	AN1	NA
H012	SAMN35883480	PRJNA987026	H	12	<31	Baseline	F	^F508 / ^F508	42	0.548983	G1	homozygous	5	0.289756	1.80031	17	<31	41-45	9	24-60	AN1	NA
H013	SAMN35883481	PRJNA987026	H	12	<31	Baseline	F	^F508 / ^F508	41	0.368917	G1	homozygous	5	0.229268	1.93065	25.25	<31	41-45	9	24-60	AN1	NA
H014	SAMN35883482	PRJNA987026	H	12	<31	Baseline	F	^F508 / ^F508	40	2.09615	G1	homozygous	3	0.638049	1.24671	14	<31	36-40	8	24-60	PAT	NA
H015	SAMN35883483	PRJNA987026	H	12	<31	Baseline	F	^F508 / ^F508	39	0.80083	G1	homozygous	5	0.376585	1.6724	14	<31	36-40	8	24-60	AN1	NA
H016	SAMN35883484	PRJNA987026	H	12	<31	Baseline	F	^F508 / ^F508	38	2.09894	G1	homozygous	3	0.579512	1.63603	20.1667	<31	36-40	8	24-60	PAT	NA
H017	SAMN35883485	PRJNA987026	H	12	<31	Baseline	F	^F508 / ^F508	37	0.946835	G1	homozygous	5	0.364878	2.11731	24.5	<31	36-40	8	24-60	AN1	NA
H018	SAMN35883486	PRJNA987026	H	12	<31	Baseline	F	^F508 / ^F508	36	0.604712	G1	homozygous	5	0.225366	2.43923	24	<31	36-40	8	24-60	AN1	NA
H019	SAMN35883487	PRJNA987026	H	12	<31	Baseline	F	^F508 / ^F508	35	0.23374	G1	homozygous	5	0.112195	2.69423	36.3333	<31	31-35	7	24-60	AN2	NA
H020	SAMN35883488	PRJNA987026	H	12	<31	Baseline	F	^F508 / ^F508	34	0.492308	G1	homozygous	5	0.249756	2.59378	34.1	<31	31-35	7	24-60	AN2	NA
H021	SAMN35883489	PRJNA987026	H	12	<31	Baseline	F	^F508 / ^F508	33	1.15931	G1	homozygous	3	0.461463	1.85079	24.125	<31	31-35	7	24-60	PAT	NA
H022	SAMN35883490	PRJNA987026	H	12	<31	Baseline	F	^F508 / ^F508	32	0.815416	G1	homozygous	5	0.392195	2.039	36.25	<31	31-35	7	24-60	AN2	NA
H023	SAMN35883491	PRJNA987026	H	12	<31	Baseline	F	^F508 / ^F508	31	1.09932	G1	homozygous	3	0.474146	1.80101	24.125	<31	31-35	7	24-60	PAT	NA
H024	SAMN35883492	PRJNA987026	H	12	<31	Baseline	F	^F508 / ^F508	30	1.39637	G1	homozygous	3	0.525854	1.57598	25.5	<31	26-30	6	24-60	PAT	NA
H025	SAMN35883493	PRJNA987026	H	12	<31	Baseline	F	^F508 / ^F508	29	0.954654	G1	homozygous	5	0.390244	2.07333	30.5	<31	26-30	6	24-60	AN2	NA
H026	SAMN35883494	PRJNA987026	H	12	<31	Baseline	F	^F508 / ^F508	26	1.04289	G1	homozygous	3	0.450732	1.92269	25	<31	26-30	6	24-60	PAT	NA
H027	SAMN35883495	PRJNA987026	H	12	<31	Baseline	F	^F508 / ^F508	25	0.175272	G1	homozygous	5	0.125854	2.0133	26	<31	21-25	5	24-60	AN1	NA
H028	SAMN35883496	PRJNA987026	H	12	<31	Baseline	F	^F508 / ^F508	24	0.6853	G1	homozygous	5	0.322927	2.08138	25.5	<31	21-25	5	24-60	AN1	NA
H029	SAMN35883497	PRJNA987026	H	12	<31	Baseline	F	^F508 / ^F508	23	0.741667	G1	homozygous	5	0.347317	2.07276	25.5	<31	21-25	5	<24	AN1	NA
H030	SAMN35883498	PRJNA987026	H	12	<31	Baseline	F	^F508 / ^F508	22	0.568627	G1	homozygous	5	0.254634	2.45635	31	<31	21-25	5	<24	AN2	NA
H031	SAMN35883499	PRJNA987026	H	12	<31	Baseline	F	^F508 / ^F508	21	0.387312	G1	homozygous	5	0.226341	2.30271	33.6667	<31	21-25	5	<24	AN2	NA
H032	SAMN35883500	PRJNA987026	H	12	<31	Baseline	F	^F508 / ^F508	20	1.03247	G1	homozygous	5	0.465366	1.73279	26.5	<31	16-20	4	<24	PAT	NA
H033	SAMN35883501	PRJNA987026	H	12	<31	Baseline	F	^F508 / ^F508	19	0.407351	G1	homozygous	5	0.259512	1.9725	28.5	<31	16-20	4	<24	AN1	NA
H034	SAMN35883502	PRJNA987026	H	12	<31	Baseline	F	^F508 / ^F508	18	0.12982	G1	homozygous	5	0.097561	2.23774	30.5	<31	16-20	4	<24	AN1	NA
H035	SAMN35883503	PRJNA987026	H	12	<31	Baseline	F	^F508 / ^F508	17	0.629834	G1	homozygous	5	0.333659	2.06906	29.5	<31	16-20	4	<24	AN2	NA
H036	SAMN35883504	PRJNA987026	H	12	<31	Baseline	F	^F508 / ^F508	16	0.744722	G1	homozygous	5	0.378537	2.09243	43.5	<31	16-20	4	<24	AN2	NA
H037	SAMN35883505	PRJNA987026	H	12	<31	Baseline	F	^F508 / ^F508	15	0.42521	G1	homozygous	5	0.246829	2.33886	32	<31	11-15	3	<24	AN2	NA
H038	SAMN35883506	PRJNA987026	H	12	<31	Exacerbation	F	^F508 / ^F508	14	0.0870147	G1	homozygous	5	0.0634146	2.36238	42	<31	11-15	3	<24	AN2	NA
H039	SAMN35883507	PRJNA987026	H	12	<31	Exacerbation	F	^F508 / ^F508	13	0.833333	G1	homozygous	5	0.394146	1.88978	27.5	<31	11-15	3	<24	AN2	NA
H040	SAMN35883508	PRJNA987026	H	12	<31	Exacerbation	F	^F508 / ^F508	12	0.129458	G1	homozygous	5	0.0956098	2.24243	42	<31	11-15	3	<24	AN2	NA
H041	SAMN35883509	PRJNA987026	H	12	<31	Exacerbation	F	^F508 / ^F508	11	0.84106	G1	homozygous	5	0.371707	2.04271	33.1667	<31	11-15	3	<24	AN2	NA
H042	SAMN35883510	PRJNA987026	H	12	<31	Exacerbation	F	^F508 / ^F508	10	0.624762	G1	homozygous	5	0.32	2.22713	34.9	<31	6-10	2	<24	AN2	NA
H043	SAMN35883511	PRJNA987026	H	12	<31	Exacerbation	F	^F508 / ^F508	9	1.31332	G1	homozygous	3	0.490732	1.85125	27.125	<31	6-10	2	<24	PAT	NA
H044	SAMN35883512	PRJNA987026	H	12	<31	Exacerbation	F	^F508 / ^F508	8	0.286219	G1	homozygous	5	0.158049	2.33018	48	<31	6-10	2	<24	AN2	NA
H045	SAMN35883513	PRJNA987026	H	12	<31	Exacerbation	F	^F508 / ^F508	7	1.12652	G1	homozygous	5	0.451707	1.90192	26.125	<31	6-10	2	<24	PAT	NA
H046	SAMN35883514	PRJNA987026	H	12	<31	Exacerbation	F	^F508 / ^F508	6	0.425	G1	homozygous	5	0.26439	1.85141	25	<31	6-10	2	<24	AN1	NA
H047	SAMN35883515	PRJNA987026	H	12	<31	Exacerbation	F	^F508 / ^F508	5	0.0810185	G1	homozygous	4	0.0682927	1.90217	26.5	<31	1-5	1	<24	AN1	NA
H048	SAMN35883516	PRJNA987026	H	12	<31	Exacerbation	F	^F508 / ^F508	4	0.533557	G1	homozygous	5	0.310244	2.10403	25.1667	<31	1-5	1	<24	AN1	NA
H049	SAMN35883517	PRJNA987026	H	12	<31	Exacerbation	F	^F508 / ^F508	3	0.42671	G1	homozygous	5	0.253659	2.18255	24.5	<31	1-5	1	<24	AN1	NA
H050	SAMN35883518	PRJNA987026	H	12	<31	Exacerbation	F	^F508 / ^F508	2	0.193103	G1	homozygous	5	0.136585	2.13199	26.5	<31	1-5	1	<24	AN1	NA
H051	SAMN35883519	PRJNA987026	H	12	<31	Exacerbation	F	^F508 / ^F508	1	0.885714	G1	homozygous	5	0.362927	1.91522	22.125	<31	1-5	1	<24	AN1	NA
I001	SAMN10871334	PRJNA520924	I	13	31-37	Baseline	F	^F508 / ^F508	59	0	G1	homozygous	6	0	2.40579	21.5	31-37	56-60	12	24-60	AN1	AN1
I002	SAMN10871335	PRJNA520924	I	13	31-37	Baseline	F	^F508 / ^F508	58	0.439604	G1	homozygous	5	0.216585	2.54887	25	31-37	56-60	12	24-60	AN1	AN1
I003	SAMN10871336	PRJNA520924	I	13	31-37	Baseline	F	^F508 / ^F508	57	0	G1	homozygous	6	0	2.46958	24	31-37	56-60	12	24-60	AN1	AN1
I004	SAMN10871337	PRJNA520924	I	13	31-37	Baseline	F	^F508 / ^F508	56	0	G1	homozygous	6	0	2.63778	24	31-37	56-60	12	24-60	AN1	AN1
I005	SAMN10871338	PRJNA520924	I	13	31-37	Baseline	F	^F508 / ^F508	55	0.00325203	G1	homozygous	6	0.00195122	2.74378	29.25	31-37	51-55	11	24-60	AN1	AN1
I006	SAMN10871339	PRJNA520924	I	13	31-37	Baseline	F	^F508 / ^F508	54	0.00152207	G1	homozygous	6	0.00097561	2.78265	33.5	31-37	51-55	11	24-60	AN1	AN1
I007	SAMN10871340	PRJNA520924	I	13	31-37	Baseline	F	^F508 / ^F508	53	0.0186916	G1	homozygous	6	0.0097561	2.63107	26	31-37	51-55	11	24-60	AN1	AN1
I008	SAMN10871341	PRJNA520924	I	13	31-37	Baseline	F	^F508 / ^F508	52	0.0137931	G1	homozygous	6	0.00780488	2.33923	21	31-37	51-55	11	24-60	AN1	AN1
I009	SAMN10871342	PRJNA520924	I	13	31-37	Baseline	F	^F508 / ^F508	51	0.0060423	G1	homozygous	6	0.00390244	2.44958	22	31-37	51-55	11	24-60	AN1	AN1
I010	SAMN10871343	PRJNA520924	I	13	31-37	Baseline	F	^F508 / ^F508	50	0.00516351	G1	homozygous	6	0.00390244	2.56597	26	31-37	46-50	10	24-60	AN1	AN1
I011	SAMN10871344	PRJNA520924	I	13	31-37	Baseline	F	^F508 / ^F508	49	0.0200861	G1	homozygous	6	0.0136585	2.47441	25.25	31-37	46-50	10	24-60	AN1	AN1
I012	SAMN10871345	PRJNA520924	I	13	31-37	Baseline	F	^F508 / ^F508	48	0.00273224	G1	homozygous	6	0.00195122	2.17041	23.5	31-37	46-50	10	24-60	AN1	AN1
I013	SAMN10871346	PRJNA520924	I	13	31-37	Baseline	F	^F508 / ^F508	47	0.00143678	G1	homozygous	6	0.00097561	2.58128	26	31-37	46-50	10	24-60	AN1	AN1
I014	SAMN10871347	PRJNA520924	I	13	31-37	Baseline	F	^F508 / ^F508	46	0.015625	G1	homozygous	6	0.0107317	2.25399	17	31-37	46-50	10	24-60	AN1	AN1
I015	SAMN10871348	PRJNA520924	I	13	31-37	Baseline	F	^F508 / ^F508	45	0.260116	G1	homozygous	5	0.129756	2.579	26	31-37	41-45	9	24-60	AN1	AN1
I016	SAMN10871349	PRJNA520924	I	13	31-37	Baseline	F	^F508 / ^F508	44	0.00973574	G1	homozygous	6	0.00682927	2.71786	27	31-37	41-45	9	24-60	AN1	AN1
I017	SAMN10871350	PRJNA520924	I	13	31-37	Baseline	F	^F508 / ^F508	43	0.00453858	G1	homozygous	6	0.00292683	2.68538	27	31-37	41-45	9	24-60	AN1	AN1
I018	SAMN10871351	PRJNA520924	I	13	31-37	Baseline	F	^F508 / ^F508	42	0	G1	homozygous	6	0	2.51982	27	31-37	41-45	9	24-60	AN1	AN1
I019	SAMN10871352	PRJNA520924	I	13	31-37	Baseline	F	^F508 / ^F508	41	0	G1	homozygous	6	0	2.44586	23	31-37	41-45	9	24-60	AN1	AN1
I020	SAMN10871353	PRJNA520924	I	13	31-37	Baseline	F	^F508 / ^F508	40	0.0030581	G1	homozygous	6	0.00195122	2.48567	25	31-37	36-40	8	24-60	AN1	AN1
I021	SAMN10871354	PRJNA520924	I	13	31-37	Baseline	F	^F508 / ^F508	39	0.011745	G1	homozygous	6	0.00682927	2.46766	25	31-37	36-40	8	24-60	AN1	AN1
I022	SAMN10871355	PRJNA520924	I	13	31-37	Baseline	F	^F508 / ^F508	38	0.0352941	G1	homozygous	6	0.0234146	2.37476	27	31-37	36-40	8	24-60	AN1	AN1
I023	SAMN10871356	PRJNA520924	I	13	31-37	Baseline	F	^F508 / ^F508	37	0.0351682	G1	homozygous	6	0.022439	2.43717	25	31-37	36-40	8	24-60	AN1	AN1
I024	SAMN10871357	PRJNA520924	I	13	31-37	Baseline	F	^F508 / ^F508	36	0.00997151	G1	homozygous	6	0.00682927	2.24791	27.5	31-37	36-40	8	24-60	AN1	AN1
I025	SAMN10871358	PRJNA520924	I	13	31-37	Baseline	F	^F508 / ^F508	35	0.0141844	G1	homozygous	6	0.00682927	2.59656	49	31-37	31-35	7	24-60	AN2	AN1
I026	SAMN10871359	PRJNA520924	I	13	31-37	Baseline	F	^F508 / ^F508	34	0.104962	G1	homozygous	6	0.0536585	2.7643	43.25	31-37	31-35	7	24-60	AN2	AN1
I027	SAMN10871360	PRJNA520924	I	13	31-37	Baseline	F	^F508 / ^F508	33	0.00195312	G1	homozygous	6	0.00682927	2.68346	39.6667	31-37	31-35	7	24-60	AN2	AN1
I028	SAMN10871361	PRJNA520924	I	13	31-37	Baseline	F	^F508 / ^F508	32	0.00770713	G1	homozygous	6	0.0117073	2.82695	44	31-37	31-35	7	24-60	AN2	AN1
I029	SAMN10871362	PRJNA520924	I	13	31-37	Baseline	F	^F508 / ^F508	31	0.0106195	G1	homozygous	6	0.00585366	2.90347	42.3333	31-37	31-35	7	24-60	AN2	AN1
I030	SAMN10871363	PRJNA520924	I	13	31-37	Baseline	F	^F508 / ^F508	30	0.0029985	G1	homozygous	6	0.00292683	2.726	38.1429	31-37	26-30	6	24-60	AN2	AN1
I031	SAMN10871364	PRJNA520924	I	13	31-37	Baseline	F	^F508 / ^F508	29	0	G1	homozygous	6	0.00097561	2.69828	56	31-37	26-30	6	24-60	AN2	AN1
I032	SAMN10871365	PRJNA520924	I	13	31-37	Baseline	F	^F508 / ^F508	28	0.00171233	G1	homozygous	6	0.00195122	2.70854	50.0625	31-37	26-30	6	24-60	AN2	AN1
I033	SAMN10871366	PRJNA520924	I	13	31-37	Baseline	F	^F508 / ^F508	27	0	G1	homozygous	6	0.0156098	2.74105	40.6667	31-37	26-30	6	24-60	AN2	AN1
I034	SAMN10871367	PRJNA520924	I	13	31-37	Baseline	F	^F508 / ^F508	26	0.0113452	G1	homozygous	6	0.00682927	2.87235	48.0833	31-37	26-30	6	24-60	AN2	AN1
I035	SAMN10871368	PRJNA520924	I	13	31-37	Baseline	F	^F508 / ^F508	25	0.0298246	G1	homozygous	6	0.0165854	2.8231	58.125	31-37	21-25	5	24-60	AN2	AN1
I036	SAMN10871370	PRJNA520924	I	13	31-37	Baseline	F	^F508 / ^F508	21	0	G1	homozygous	6	0.00487805	2.49622	37.3333	31-37	21-25	5	<24	AN2	AN1
I037	SAMN10871371	PRJNA520924	I	13	31-37	Baseline	F	^F508 / ^F508	20	0	G1	homozygous	6	0.0273171	2.6526	37.125	31-37	16-20	4	<24	AN2	AN1
I038	SAMN10871372	PRJNA520924	I	13	31-37	Baseline	F	^F508 / ^F508	19	0.0238853	G1	homozygous	6	0.0165854	2.50452	41.1667	31-37	16-20	4	<24	AN2	AN1
I039	SAMN10871373	PRJNA520924	I	13	31-37	Baseline	F	^F508 / ^F508	18	0.017452	G1	homozygous	6	0.0165854	2.53674	24	31-37	16-20	4	<24	AN1	AN1
I040	SAMN10871374	PRJNA520924	I	13	31-37	Baseline	F	^F508 / ^F508	17	0.0936968	G1	homozygous	6	0.0517073	2.46655	25.1667	31-37	16-20	4	<24	AN1	AN1
I041	SAMN10871375	PRJNA520924	I	13	31-37	Baseline	F	^F508 / ^F508	16	0.160063	G1	homozygous	5	0.0985366	2.31293	21	31-37	16-20	4	<24	AN1	AN1
I042	SAMN10871376	PRJNA520924	I	13	31-37	Baseline	F	^F508 / ^F508	15	0.148387	G1	homozygous	5	0.0897561	2.66785	29	31-37	11-15	3	<24	AN1	AN1
I043	SAMN35882999	PRJNA987026	I	13	31-37	Exacerbation	F	^F508 / ^F508	14	0.0030581	G1	homozygous	6	0.00195122	2.54605	28	31-37	11-15	3	<24	AN1	AN1
I044	SAMN35883000	PRJNA987026	I	13	31-37	Exacerbation	F	^F508 / ^F508	13	0.0014245	G1	homozygous	6	0.00878049	2.45078	35	31-37	11-15	3	<24	AN1	AN1
I045	SAMN35883001	PRJNA987026	I	13	31-37	Exacerbation	F	^F508 / ^F508	12	0.0384025	G1	homozygous	6	0.0243902	2.47452	30.6667	31-37	11-15	3	<24	AN1	AN1
I046	SAMN35883002	PRJNA987026	I	13	31-37	Exacerbation	F	^F508 / ^F508	11	0.0119048	G1	homozygous	6	0.00780488	2.21723	33	31-37	11-15	3	<24	AN1	AN1
I047	SAMN35883003	PRJNA987026	I	13	31-37	Exacerbation	F	^F508 / ^F508	10	0.0132353	G1	homozygous	6	0.00878049	2.44942	25	31-37	6-10	2	<24	AN1	AN1
I048	SAMN35883004	PRJNA987026	I	13	31-37	Exacerbation	F	^F508 / ^F508	9	0.121508	G1	homozygous	5	0.084878	2.23671	22	31-37	6-10	2	<24	AN1	AN1
I049	SAMN35883005	PRJNA987026	I	13	31-37	Exacerbation	F	^F508 / ^F508	8	0.887892	G1	homozygous	5	0.386341	2.0076	22	31-37	6-10	2	<24	AN1	AN1
I050	SAMN35883006	PRJNA987026	I	13	31-37	Exacerbation	F	^F508 / ^F508	7	0.00875912	G1	homozygous	6	0.00585366	2.46357	26.25	31-37	6-10	2	<24	AN1	AN1
I051	SAMN35883007	PRJNA987026	I	13	31-37	Exacerbation	F	^F508 / ^F508	6	0.109204	G1	homozygous	5	0.0604878	2.84016	33	31-37	6-10	2	<24	AN2	AN1
I052	SAMN35883008	PRJNA987026	I	13	31-37	Exacerbation	F	^F508 / ^F508	5	0.0460123	G1	homozygous	6	0.0282927	2.58036	31	31-37	1-5	1	<24	AN1	AN1
I053	SAMN35883009	PRJNA987026	I	13	31-37	Exacerbation	F	^F508 / ^F508	4	0.00591716	G1	homozygous	6	0.00390244	2.5936	28	31-37	1-5	1	<24	AN1	AN1
I054	SAMN35883010	PRJNA987026	I	13	31-37	Exacerbation	F	^F508 / ^F508	3	0	G1	homozygous	6	0	2.37456	21.5	31-37	1-5	1	<24	AN1	AN1
I055	SAMN35883011	PRJNA987026	I	13	31-37	Exacerbation	F	^F508 / ^F508	2	0	G1	homozygous	6	0	2.52259	38.5	31-37	1-5	1	<24	AN2	AN1
I056	SAMN35883012	PRJNA987026	I	13	31-37	Exacerbation	F	^F508 / ^F508	1	0	G1	homozygous	6	0	2.67093	38.6667	31-37	1-5	1	<24	AN2	AN1
I057	SAMN11251087	PRJNA520924	I	14	38-52	Baseline	F	^F508 / ^F508	59	0.0778689	G1	homozygous	6	0.0370732	2.52076	21.5	38-52	56-60	12	24-60	AN1	AN1
I058	SAMN11251088	PRJNA520924	I	14	38-52	Baseline	F	^F508 / ^F508	58	0.0169173	G1	homozygous	6	0.0214634	2.66243	33.5	38-52	56-60	12	24-60	AN1	AN1
I059	SAMN11251089	PRJNA520924	I	14	38-52	Baseline	F	^F508 / ^F508	57	0.0245283	G1	homozygous	6	0.0292683	2.7941	30	38-52	56-60	12	24-60	AN1	AN1
I060	SAMN11251090	PRJNA520924	I	14	38-52	Baseline	F	^F508 / ^F508	56	0.0792291	G1	homozygous	6	0.035122	2.75491	28	38-52	56-60	12	24-60	AN1	AN1
I061	SAMN11251091	PRJNA520924	I	14	38-52	Baseline	F	^F508 / ^F508	55	0.00808081	G1	homozygous	6	0.0243902	2.81587	31.1667	38-52	51-55	11	24-60	AN1	AN1
I062	SAMN11251092	PRJNA520924	I	14	38-52	Baseline	F	^F508 / ^F508	54	0.0582329	G1	homozygous	6	0.0273171	2.74348	35.5	38-52	51-55	11	24-60	AN1	AN1
I063	SAMN11251093	PRJNA520924	I	14	38-52	Baseline	F	^F508 / ^F508	53	0.250513	G1	homozygous	5	0.114146	2.60569	24	38-52	51-55	11	24-60	AN1	AN1
I064	SAMN11251094	PRJNA520924	I	14	38-52	Baseline	F	^F508 / ^F508	52	0	G1	homozygous	6	0.04	2.71648	28	38-52	51-55	11	24-60	AN1	AN1
I065	SAMN11251095	PRJNA520924	I	14	38-52	Baseline	F	^F508 / ^F508	51	0.00888099	G1	homozygous	6	0.04	2.75847	35.5	38-52	51-55	11	24-60	AN2	AN1
I066	SAMN11251096	PRJNA520924	I	14	38-52	Baseline	F	^F508 / ^F508	50	0.0035524	G1	homozygous	6	0.04	2.64554	35.25	38-52	46-50	10	24-60	AN1	AN1
I067	SAMN11251097	PRJNA520924	I	14	38-52	Baseline	F	^F508 / ^F508	49	0	G1	homozygous	6	0.0429268	2.60522	27.5	38-52	46-50	10	24-60	AN1	AN1
I068	SAMN11251098	PRJNA520924	I	14	38-52	Baseline	F	^F508 / ^F508	48	0.0127737	G1	homozygous	6	0.0312195	2.75953	30.25	38-52	46-50	10	24-60	AN1	AN1
I069	SAMN11251099	PRJNA520924	I	14	38-52	Baseline	F	^F508 / ^F508	47	0	G1	homozygous	6	0.0292683	2.71452	31	38-52	46-50	10	24-60	AN1	AN1
I070	SAMN11251100	PRJNA520924	I	14	38-52	Baseline	F	^F508 / ^F508	46	0	G1	homozygous	6	0.035122	2.85775	37.125	38-52	46-50	10	24-60	AN2	AN1
I071	SAMN11251102	PRJNA520924	I	14	38-52	Baseline	F	^F508 / ^F508	43	0.0341463	G1	homozygous	6	0.0468293	2.6616	29.125	38-52	41-45	9	24-60	AN1	AN1
I072	SAMN11251103	PRJNA520924	I	14	38-52	Baseline	F	^F508 / ^F508	42	0.0252366	G1	homozygous	6	0.04	2.70283	32	38-52	41-45	9	24-60	AN1	AN1
I073	SAMN11251104	PRJNA520924	I	14	38-52	Baseline	F	^F508 / ^F508	41	0	G1	homozygous	6	0	2.60146	29.25	38-52	41-45	9	24-60	AN1	AN1
I074	SAMN11251106	PRJNA520924	I	14	38-52	Baseline	F	^F508 / ^F508	38	0.0222603	G1	homozygous	6	0.0126829	2.88435	37	38-52	36-40	8	24-60	AN2	AN1
I075	SAMN11251107	PRJNA520924	I	14	38-52	Baseline	F	^F508 / ^F508	37	0.0271605	G1	homozygous	6	0.0107317	2.77372	35.9	38-52	36-40	8	24-60	AN1	AN1
I076	SAMN11251108	PRJNA520924	I	14	38-52	Baseline	F	^F508 / ^F508	36	0.00576369	G1	homozygous	6	0.00195122	2.7499	29.6667	38-52	36-40	8	24-60	AN1	AN1
I077	SAMN11251109	PRJNA520924	I	14	38-52	Baseline	F	^F508 / ^F508	35	0.183374	G1	homozygous	6	0.0731707	2.63959	27	38-52	31-35	7	24-60	AN1	AN1
I078	SAMN11251110	PRJNA520924	I	14	38-52	Baseline	F	^F508 / ^F508	34	0.00364964	G1	homozygous	6	0.00292683	2.54286	32.125	38-52	31-35	7	24-60	AN1	AN1
I079	SAMN11251111	PRJNA520924	I	14	38-52	Baseline	F	^F508 / ^F508	33	0	G1	homozygous	6	0	2.62391	31.6667	38-52	31-35	7	24-60	AN1	AN1
I080	SAMN11251112	PRJNA520924	I	14	38-52	Baseline	F	^F508 / ^F508	32	0.0526316	G1	homozygous	6	0.0263415	2.7124	34.5	38-52	31-35	7	24-60	AN1	AN1
I081	SAMN11251113	PRJNA520924	I	14	38-52	Baseline	F	^F508 / ^F508	31	0.0362976	G1	homozygous	6	0.0195122	2.68302	35	38-52	31-35	7	24-60	AN1	AN1
I082	SAMN11251114	PRJNA520924	I	14	38-52	Baseline	F	^F508 / ^F508	30	0.0157791	G1	homozygous	6	0.00780488	2.67727	31	38-52	26-30	6	24-60	AN1	AN1
I083	SAMN11251115	PRJNA520924	I	14	38-52	Baseline	F	^F508 / ^F508	29	0.00978474	G1	homozygous	6	0.00487805	2.50683	23	38-52	26-30	6	24-60	AN1	AN1
I084	SAMN11251116	PRJNA520924	I	14	38-52	Baseline	F	^F508 / ^F508	28	0	G1	homozygous	6	0	2.49569	27	38-52	26-30	6	24-60	AN1	AN1
I085	SAMN11251117	PRJNA520924	I	14	38-52	Baseline	F	^F508 / ^F508	27	0.0355649	G1	homozygous	6	0.0165854	2.82634	35.5	38-52	26-30	6	24-60	AN1	AN1
I086	SAMN11251118	PRJNA520924	I	14	38-52	Baseline	F	^F508 / ^F508	26	0	G1	homozygous	6	0	2.66656	24	38-52	26-30	6	24-60	AN1	AN1
I087	SAMN11251119	PRJNA520924	I	14	38-52	Baseline	F	^F508 / ^F508	25	0.00716846	G1	homozygous	6	0.00390244	2.57184	26	38-52	21-25	5	24-60	AN1	AN1
I088	SAMN11251120	PRJNA520924	I	14	38-52	Baseline	F	^F508 / ^F508	24	0.0415094	G1	homozygous	6	0.0214634	2.80051	27.5	38-52	21-25	5	24-60	AN1	AN1
I089	SAMN11251121	PRJNA520924	I	14	38-52	Baseline	F	^F508 / ^F508	23	0	G1	homozygous	6	0	2.72179	25	38-52	21-25	5	<24	AN1	AN1
I090	SAMN11251122	PRJNA520924	I	14	38-52	Baseline	F	^F508 / ^F508	22	0.00153139	G1	homozygous	6	0.00097561	2.66284	26.1667	38-52	21-25	5	<24	AN1	AN1
I091	SAMN11251123	PRJNA520924	I	14	38-52	Baseline	F	^F508 / ^F508	21	0.0043956	G1	homozygous	6	0.00195122	2.77114	30	38-52	21-25	5	<24	AN1	AN1
I092	SAMN11251124	PRJNA520924	I	14	38-52	Baseline	F	^F508 / ^F508	20	0	G1	homozygous	6	0	2.50424	24	38-52	16-20	4	<24	AN1	AN1
I093	SAMN11251125	PRJNA520924	I	14	38-52	Baseline	F	^F508 / ^F508	19	0.00589391	G1	homozygous	6	0.00292683	2.72372	29	38-52	16-20	4	<24	AN1	AN1
I094	SAMN11251126	PRJNA520924	I	14	38-52	Baseline	F	^F508 / ^F508	18	0	G1	homozygous	6	0	2.8425	31	38-52	16-20	4	<24	AN1	AN1
I095	SAMN11251127	PRJNA520924	I	14	38-52	Baseline	F	^F508 / ^F508	17	0.0127505	G1	homozygous	6	0.00682927	2.74493	36	38-52	16-20	4	<24	AN1	AN1
I096	SAMN11251128	PRJNA520924	I	14	38-52	Baseline	F	^F508 / ^F508	16	0.00665188	G1	homozygous	6	0.00292683	2.7056	33	38-52	16-20	4	<24	AN1	AN1
I097	SAMN11251129	PRJNA520924	I	14	38-52	Baseline	F	^F508 / ^F508	15	0.0111317	G1	homozygous	6	0.00585366	2.69752	42	38-52	11-15	3	<24	AN2	AN1
I098	SAMN35883013	PRJNA987026	I	14	38-52	Exacerbation	F	^F508 / ^F508	12	0.0733453	G1	homozygous	6	0.04	2.86994	35.5	38-52	11-15	3	<24	AN2	AN1
I099	SAMN35883014	PRJNA987026	I	14	38-52	Exacerbation	F	^F508 / ^F508	11	0.00628931	G1	homozygous	6	0.00390244	2.68563	35.125	38-52	11-15	3	<24	AN1	AN1
I100	SAMN35883015	PRJNA987026	I	14	38-52	Exacerbation	F	^F508 / ^F508	10	0.029654	G1	homozygous	6	0.017561	2.84637	41.5	38-52	6-10	2	<24	AN2	AN1
I101	SAMN35883016	PRJNA987026	I	14	38-52	Exacerbation	F	^F508 / ^F508	9	0.0020202	G1	homozygous	6	0.0721951	3.0469	39	38-52	6-10	2	<24	AN2	AN1
I102	SAMN35883017	PRJNA987026	I	14	38-52	Exacerbation	F	^F508 / ^F508	8	0.00869565	G1	homozygous	6	0.00390244	2.7517	33.125	38-52	6-10	2	<24	AN1	AN1
I103	SAMN35883018	PRJNA987026	I	14	38-52	Exacerbation	F	^F508 / ^F508	7	0.00223714	G1	homozygous	6	0.00097561	2.63951	33.6667	38-52	6-10	2	<24	AN1	AN1
I104	SAMN35883019	PRJNA987026	I	14	38-52	Exacerbation	F	^F508 / ^F508	6	0	G1	homozygous	6	0	2.81855	34.25	38-52	6-10	2	<24	AN1	AN1
I105	SAMN35883020	PRJNA987026	I	14	38-52	Exacerbation	F	^F508 / ^F508	5	0.00168634	G1	homozygous	6	0.00097561	2.71016	35.6429	38-52	1-5	1	<24	AN1	AN1
I106	SAMN35883021	PRJNA987026	I	14	38-52	Exacerbation	F	^F508 / ^F508	4	0	G1	homozygous	6	0	2.50825	30	38-52	1-5	1	<24	AN1	AN1
I107	SAMN35883022	PRJNA987026	I	14	38-52	Exacerbation	F	^F508 / ^F508	3	0	G1	homozygous	6	0	2.83306	35	38-52	1-5	1	<24	AN1	AN1
I108	SAMN35883023	PRJNA987026	I	14	38-52	Exacerbation	F	^F508 / ^F508	2	0.560538	G1	homozygous	5	0.243902	2.66904	33.1667	38-52	1-5	1	<24	AN2	AN1
I109	SAMN35883024	PRJNA987026	I	14	38-52	Exacerbation	F	^F508 / ^F508	1	0.039604	G1	homozygous	6	0.0195122	2.71446	30	38-52	1-5	1	<24	AN1	AN1
I110	SAMN10871502	PRJNA520924	I	15	38-52	Baseline	F	^F508 / ^F508	59	0	G1	homozygous	6	0.0282927	2.76455	31.6667	38-52	56-60	12	24-60	AN1	AN2
I111	SAMN10871503	PRJNA520924	I	15	38-52	Baseline	F	^F508 / ^F508	58	0	G1	homozygous	6	0.0595122	2.98835	35.1667	38-52	56-60	12	24-60	AN2	AN2
I112	SAMN10871504	PRJNA520924	I	15	38-52	Baseline	F	^F508 / ^F508	57	0	G1	homozygous	6	0.0282927	2.70018	32.5	38-52	56-60	12	24-60	AN1	AN2
I113	SAMN10871505	PRJNA520924	I	15	38-52	Baseline	F	^F508 / ^F508	56	0	G1	homozygous	6	0.0263415	2.57692	27	38-52	56-60	12	24-60	AN1	AN2
I114	SAMN10871506	PRJNA520924	I	15	38-52	Baseline	F	^F508 / ^F508	55	0	G1	homozygous	6	0.0107317	2.49333	26	38-52	51-55	11	24-60	AN1	AN2
I115	SAMN10871507	PRJNA520924	I	15	38-52	Baseline	F	^F508 / ^F508	54	0	G1	homozygous	6	0.0195122	2.57156	33	38-52	51-55	11	24-60	AN1	AN2
I116	SAMN10871508	PRJNA520924	I	15	38-52	Baseline	F	^F508 / ^F508	53	0	G1	homozygous	6	0.0312195	2.85642	34.1667	38-52	51-55	11	24-60	AN1	AN2
I117	SAMN10871509	PRJNA520924	I	15	38-52	Baseline	F	^F508 / ^F508	52	0	G1	homozygous	6	0.0165854	2.78151	37.5	38-52	51-55	11	24-60	AN2	AN2
I118	SAMN10871510	PRJNA520924	I	15	38-52	Baseline	F	^F508 / ^F508	51	0.00166113	G1	homozygous	6	0.0146341	2.81306	44	38-52	51-55	11	24-60	AN2	AN2
I119	SAMN10871511	PRJNA520924	I	15	38-52	Baseline	F	^F508 / ^F508	50	0.015873	G1	homozygous	6	0.0195122	2.79454	43.6667	38-52	46-50	10	24-60	AN2	AN2
I120	SAMN10871512	PRJNA520924	I	15	38-52	Baseline	F	^F508 / ^F508	49	0	G1	homozygous	6	0.0107317	2.59896	34.125	38-52	46-50	10	24-60	AN1	AN2
I121	SAMN10871513	PRJNA520924	I	15	38-52	Baseline	F	^F508 / ^F508	48	0.0199601	G1	homozygous	6	0.0234146	2.65378	50.6667	38-52	46-50	10	24-60	AN2	AN2
I122	SAMN10871514	PRJNA520924	I	15	38-52	Baseline	F	^F508 / ^F508	47	0.0538117	G1	homozygous	6	0.0312195	2.91933	45.25	38-52	46-50	10	24-60	AN2	AN2
I123	SAMN10871515	PRJNA520924	I	15	38-52	Baseline	F	^F508 / ^F508	46	0.0125392	G1	homozygous	6	0.0107317	2.67938	41	38-52	46-50	10	24-60	AN2	AN2
I124	SAMN10871516	PRJNA520924	I	15	38-52	Baseline	F	^F508 / ^F508	45	0.00938967	G1	homozygous	6	0.0195122	2.69432	46.5	38-52	41-45	9	24-60	AN2	AN2
I125	SAMN10871517	PRJNA520924	I	15	38-52	Baseline	F	^F508 / ^F508	44	3.36269	G1	homozygous	3	0.633171	1.60014	36.125	38-52	41-45	9	24-60	PAT	AN2
I126	SAMN10871518	PRJNA520924	I	15	38-52	Baseline	F	^F508 / ^F508	43	0.0469417	G1	homozygous	6	0.0321951	2.79182	34.6667	38-52	41-45	9	24-60	AN1	AN2
I127	SAMN10871519	PRJNA520924	I	15	38-52	Baseline	F	^F508 / ^F508	42	0	G1	homozygous	6	0.0117073	2.68615	42.125	38-52	41-45	9	24-60	AN2	AN2
I128	SAMN10871520	PRJNA520924	I	15	38-52	Baseline	F	^F508 / ^F508	41	2.29885	G1	homozygous	3	0.585366	1.74324	27.1667	38-52	41-45	9	24-60	PAT	AN2
I129	SAMN10871521	PRJNA520924	I	15	38-52	Baseline	F	^F508 / ^F508	40	0.572727	G1	homozygous	5	0.245854	2.20003	31.5	38-52	36-40	8	24-60	AN2	AN2
I130	SAMN10871522	PRJNA520924	I	15	38-52	Baseline	F	^F508 / ^F508	39	0.213904	G1	homozygous	5	0.117073	2.6225	29.25	38-52	36-40	8	24-60	AN1	AN2
I131	SAMN10871523	PRJNA520924	I	15	38-52	Baseline	F	^F508 / ^F508	38	0	G1	homozygous	6	0.0419512	2.78469	31	38-52	36-40	8	24-60	AN1	AN2
I132	SAMN10871524	PRJNA520924	I	15	38-52	Baseline	F	^F508 / ^F508	37	0	G1	homozygous	6	0.0390244	2.71671	28	38-52	36-40	8	24-60	AN1	AN2
I133	SAMN10871525	PRJNA520924	I	15	38-52	Baseline	F	^F508 / ^F508	36	0.5803	G1	homozygous	5	0.26439	2.46545	30.25	38-52	36-40	8	24-60	AN2	AN2
I134	SAMN10871526	PRJNA520924	I	15	38-52	Baseline	F	^F508 / ^F508	35	0.0192308	G1	homozygous	6	0.0341463	2.83577	32	38-52	31-35	7	24-60	AN1	AN2
I135	SAMN10871527	PRJNA520924	I	15	38-52	Baseline	F	^F508 / ^F508	34	0	G1	homozygous	6	0.00487805	2.65143	29	38-52	31-35	7	24-60	AN1	AN2
I136	SAMN10871528	PRJNA520924	I	15	38-52	Baseline	F	^F508 / ^F508	33	0	G1	homozygous	6	0.00390244	2.88287	34	38-52	31-35	7	24-60	AN1	AN2
I137	SAMN10871529	PRJNA520924	I	15	38-52	Baseline	F	^F508 / ^F508	32	0	G1	homozygous	6	0	2.55996	26	38-52	31-35	7	24-60	AN1	AN2
I138	SAMN10871530	PRJNA520924	I	15	38-52	Baseline	F	^F508 / ^F508	31	0	G1	homozygous	6	0.00780488	2.58243	27.5	38-52	31-35	7	24-60	AN1	AN2
I139	SAMN10871531	PRJNA520924	I	15	38-52	Baseline	F	^F508 / ^F508	30	0.00447094	G1	homozygous	6	0.00292683	2.63645	23	38-52	26-30	6	24-60	AN1	AN2
I140	SAMN10871532	PRJNA520924	I	15	38-52	Baseline	F	^F508 / ^F508	29	0	G1	homozygous	6	0	2.63831	24	38-52	26-30	6	24-60	AN1	AN2
I141	SAMN10871533	PRJNA520924	I	15	38-52	Baseline	F	^F508 / ^F508	28	1.73754	G1	homozygous	3	0.510244	2.00791	22	38-52	26-30	6	24-60	PAT	AN2
I142	SAMN10871534	PRJNA520924	I	15	38-52	Baseline	F	^F508 / ^F508	27	0.010118	G1	homozygous	6	0.00585366	2.69316	24	38-52	26-30	6	24-60	AN1	AN2
I143	SAMN10871535	PRJNA520924	I	15	38-52	Baseline	F	^F508 / ^F508	26	0.176938	G1	homozygous	5	0.0868293	2.62252	23.5	38-52	26-30	6	24-60	AN1	AN2
I144	SAMN10871536	PRJNA520924	I	15	38-52	Baseline	F	^F508 / ^F508	25	0	G1	homozygous	6	0.00097561	2.52659	21	38-52	21-25	5	24-60	AN1	AN2
I145	SAMN10871537	PRJNA520924	I	15	38-52	Baseline	F	^F508 / ^F508	24	0.769388	G1	homozygous	5	0.367805	2.05763	20	38-52	21-25	5	24-60	AN1	AN2
I146	SAMN10871538	PRJNA520924	I	15	38-52	Baseline	F	^F508 / ^F508	23	0.00652528	G1	homozygous	6	0.00292683	2.85336	45.1667	38-52	21-25	5	<24	AN2	AN2
I147	SAMN10871539	PRJNA520924	I	15	38-52	Baseline	F	^F508 / ^F508	22	0.00182815	G1	homozygous	6	0.00097561	2.64736	32.5	38-52	21-25	5	<24	AN1	AN2
I148	SAMN10871540	PRJNA520924	I	15	38-52	Baseline	F	^F508 / ^F508	21	0.0297521	G1	homozygous	6	0.0156098	2.63577	35.25	38-52	21-25	5	<24	AN1	AN2
I149	SAMN10871541	PRJNA520924	I	15	38-52	Baseline	F	^F508 / ^F508	20	0.0994854	G1	homozygous	6	0.0565854	2.64273	27	38-52	16-20	4	<24	AN1	AN2
I150	SAMN10871542	PRJNA520924	I	15	38-52	Baseline	F	^F508 / ^F508	19	1.13158	G1	homozygous	5	0.355122	2.46566	34.5	38-52	16-20	4	<24	AN2	AN2
I151	SAMN10871543	PRJNA520924	I	15	38-52	Baseline	F	^F508 / ^F508	18	0.267658	G1	homozygous	5	0.140488	2.66436	34.5	38-52	16-20	4	<24	AN2	AN2
I152	SAMN10871544	PRJNA520924	I	15	38-52	Baseline	F	^F508 / ^F508	17	0.00658979	G1	homozygous	6	0.00390244	2.75256	39	38-52	16-20	4	<24	AN2	AN2
I153	SAMN10871545	PRJNA520924	I	15	38-52	Baseline	F	^F508 / ^F508	16	0.00511073	G1	homozygous	6	0.00292683	2.90149	39.3333	38-52	16-20	4	<24	AN2	AN2
I154	SAMN10871546	PRJNA520924	I	15	38-52	Baseline	F	^F508 / ^F508	15	0.00894454	G1	homozygous	6	0.00292683	2.82024	38.6	38-52	11-15	3	<24	AN2	AN2
I155	SAMN35883025	PRJNA987026	I	15	38-52	Exacerbation	F	^F508 / ^F508	14	0.0235988	G1	homozygous	6	0.00780488	2.88894	35.125	38-52	11-15	3	<24	AN1	AN2
I156	SAMN35883026	PRJNA987026	I	15	38-52	Exacerbation	F	^F508 / ^F508	13	0.0752394	G1	homozygous	5	0.035122	2.91029	43	38-52	11-15	3	<24	AN2	AN2
I157	SAMN35883027	PRJNA987026	I	15	38-52	Exacerbation	F	^F508 / ^F508	12	0.00330033	G1	homozygous	6	0.00195122	3.01086	39.6429	38-52	11-15	3	<24	AN2	AN2
I158	SAMN35883028	PRJNA987026	I	15	38-52	Exacerbation	F	^F508 / ^F508	11	0.00168634	G1	homozygous	6	0.00097561	2.95154	42.25	38-52	11-15	3	<24	AN2	AN2
I159	SAMN35883029	PRJNA987026	I	15	38-52	Exacerbation	F	^F508 / ^F508	10	0.00863309	G1	homozygous	6	0.00585366	2.61252	24.5	38-52	6-10	2	<24	AN1	AN2
I160	SAMN35883030	PRJNA987026	I	15	38-52	Exacerbation	F	^F508 / ^F508	9	0.00147059	G1	homozygous	6	0.00097561	2.78166	43	38-52	6-10	2	<24	AN2	AN2
I161	SAMN35883031	PRJNA987026	I	15	38-52	Exacerbation	F	^F508 / ^F508	8	1.68421	G1	homozygous	3	0.499512	1.98927	27	38-52	6-10	2	<24	PAT	AN2
I162	SAMN35883032	PRJNA987026	I	15	38-52	Exacerbation	F	^F508 / ^F508	7	0.0297723	G1	homozygous	6	0.0165854	2.96744	36	38-52	6-10	2	<24	AN2	AN2
I163	SAMN35883033	PRJNA987026	I	15	38-52	Exacerbation	F	^F508 / ^F508	6	0.00542496	G1	homozygous	6	0.00195122	2.90788	40.6	38-52	6-10	2	<24	AN2	AN2
I164	SAMN35883034	PRJNA987026	I	15	38-52	Exacerbation	F	^F508 / ^F508	5	0.00628931	G1	homozygous	6	0.00292683	2.90475	37.5	38-52	1-5	1	<24	AN2	AN2
I165	SAMN35883035	PRJNA987026	I	15	38-52	Exacerbation	F	^F508 / ^F508	4	0.00191939	G1	homozygous	6	0.00195122	2.88819	48	38-52	1-5	1	<24	AN2	AN2
I166	SAMN35883036	PRJNA987026	I	15	38-52	Exacerbation	F	^F508 / ^F508	3	0.0104167	G1	homozygous	6	0.00292683	2.84838	47.125	38-52	1-5	1	<24	AN2	AN2
I167	SAMN35883037	PRJNA987026	I	15	38-52	Exacerbation	F	^F508 / ^F508	2	0.0530612	G1	homozygous	6	0.0146341	3.00617	58.125	38-52	1-5	1	<24	AN2	AN2
I168	SAMN35883038	PRJNA987026	I	15	38-52	Exacerbation	F	^F508 / ^F508	1	0.00577201	G1	homozygous	6	0.00292683	2.81516	42	38-52	1-5	1	<24	AN2	AN2
J001	SAMN35883039	PRJNA987026	J	16	<31	Baseline	M	^F508 / ^F508	58	0.861224	G1	homozygous	2	0.205854	2.53651	29	<31	56-60	12	24-60	PAT	PAT
J002	SAMN35883040	PRJNA987026	J	16	<31	Baseline	M	^F508 / ^F508	57	2	G1	homozygous	2	0.296585	2.07239	25.25	<31	56-60	12	24-60	PAT	PAT
J003	SAMN35883041	PRJNA987026	J	16	<31	Baseline	M	^F508 / ^F508	56	1.31579	G1	homozygous	2	0.219512	2.20049	23	<31	56-60	12	24-60	PAT	PAT
J004	SAMN35883042	PRJNA987026	J	16	<31	Baseline	M	^F508 / ^F508	55	0.875	G1	homozygous	2	0.170732	2.08491	21	<31	56-60	12	24-60	PAT	PAT
J005	SAMN35883043	PRJNA987026	J	16	<31	Baseline	M	^F508 / ^F508	54	0.552817	G1	homozygous	2	0.153171	2.598	29	<31	51-55	11	24-60	PAT	PAT
J006	SAMN35883044	PRJNA987026	J	16	<31	Baseline	M	^F508 / ^F508	53	2.50459	G1	homozygous	2	0.266341	1.8614	23	<31	51-55	11	24-60	PAT	PAT
J007	SAMN35883045	PRJNA987026	J	16	<31	Baseline	M	^F508 / ^F508	52	1.16942	G1	homozygous	2	0.276098	2.46831	33	<31	51-55	11	24-60	PAT	PAT
J008	SAMN35883046	PRJNA987026	J	16	<31	Baseline	M	^F508 / ^F508	51	2.22556	G1	homozygous	2	0.28878	1.85901	22	<31	51-55	11	24-60	PAT	PAT
J009	SAMN35883047	PRJNA987026	J	16	<31	Baseline	M	^F508 / ^F508	50	1.77108	G1	homozygous	2	0.286829	2.10348	29	<31	51-55	11	24-60	PAT	PAT
J010	SAMN35883048	PRJNA987026	J	16	<31	Baseline	M	^F508 / ^F508	49	0.221258	G1	homozygous	5	0.0995122	2.77103	30	<31	46-50	10	24-60	AN2	PAT
J011	SAMN35883049	PRJNA987026	J	16	<31	Baseline	M	^F508 / ^F508	48	0.832168	G1	homozygous	2	0.232195	2.54173	29.5	<31	46-50	10	24-60	PAT	PAT
J012	SAMN35883050	PRJNA987026	J	16	<31	Baseline	M	^F508 / ^F508	47	1.67773	G1	homozygous	2	0.345366	2.19647	25	<31	46-50	10	24-60	PAT	PAT
J013	SAMN35883051	PRJNA987026	J	16	<31	Baseline	M	^F508 / ^F508	46	2.19091	G1	homozygous	2	0.235122	2.26887	30.6	<31	46-50	10	24-60	PAT	PAT
J014	SAMN35883052	PRJNA987026	J	16	<31	Baseline	M	^F508 / ^F508	45	5.57627	G1	homozygous	2	0.320976	1.60544	19	<31	46-50	10	24-60	PAT	PAT
J015	SAMN35883053	PRJNA987026	J	16	<31	Baseline	M	^F508 / ^F508	44	13.8718	G1	homozygous	2	0.527805	1.41831	20	<31	41-45	9	24-60	PAT	PAT
J016	SAMN35883054	PRJNA987026	J	16	<31	Baseline	M	^F508 / ^F508	43	5.11667	G1	homozygous	2	0.299512	2.12531	26.1667	<31	41-45	9	24-60	PAT	PAT
J017	SAMN35883055	PRJNA987026	J	16	<31	Baseline	M	^F508 / ^F508	42	5.81481	G1	homozygous	2	0.306341	1.79512	18.5	<31	41-45	9	24-60	PAT	PAT
J018	SAMN35883056	PRJNA987026	J	16	<31	Baseline	M	^F508 / ^F508	41	7.67273	G1	homozygous	2	0.411707	1.7172	21	<31	41-45	9	24-60	PAT	PAT
J019	SAMN35883057	PRJNA987026	J	16	<31	Baseline	M	^F508 / ^F508	40	1.68987	G1	homozygous	2	0.260488	2.44751	34.5	<31	41-45	9	24-60	PAT	PAT
J020	SAMN35883058	PRJNA987026	J	16	<31	Baseline	M	^F508 / ^F508	39	7.29825	G1	homozygous	2	0.405854	1.70227	23.25	<31	36-40	8	24-60	PAT	PAT
J021	SAMN35883059	PRJNA987026	J	16	<31	Baseline	M	^F508 / ^F508	38	2.96639	G1	homozygous	2	0.34439	2.16546	23.5	<31	36-40	8	24-60	PAT	PAT
J022	SAMN35883060	PRJNA987026	J	16	<31	Baseline	M	^F508 / ^F508	37	2.27742	G1	homozygous	2	0.34439	1.86048	26.5	<31	36-40	8	24-60	PAT	PAT
J023	SAMN35883061	PRJNA987026	J	16	<31	Baseline	M	^F508 / ^F508	36	3.61062	G1	homozygous	2	0.398049	1.64163	17	<31	36-40	8	24-60	PAT	PAT
J024	SAMN35883062	PRJNA987026	J	16	<31	Baseline	M	^F508 / ^F508	35	4.49474	G1	homozygous	2	0.416585	1.89887	23.5	<31	36-40	8	24-60	PAT	PAT
J025	SAMN35883063	PRJNA987026	J	16	<31	Baseline	M	^F508 / ^F508	34	2.66038	G1	homozygous	2	0.275122	2.14971	23	<31	31-35	7	24-60	PAT	PAT
J026	SAMN35883064	PRJNA987026	J	16	<31	Baseline	M	^F508 / ^F508	33	8.06383	G1	homozygous	2	0.369756	1.66167	19	<31	31-35	7	24-60	PAT	PAT
J027	SAMN35883065	PRJNA987026	J	16	<31	Baseline	M	^F508 / ^F508	32	1.75556	G1	homozygous	2	0.23122	2.32753	24	<31	31-35	7	24-60	PAT	PAT
J028	SAMN35883066	PRJNA987026	J	16	<31	Baseline	M	^F508 / ^F508	31	4.86154	G1	homozygous	2	0.308293	1.53408	22.6667	<31	31-35	7	24-60	PAT	PAT
J029	SAMN35883067	PRJNA987026	J	16	<31	Baseline	M	^F508 / ^F508	30	6.33929	G1	homozygous	2	0.346341	1.34975	19.5	<31	31-35	7	24-60	PAT	PAT
J030	SAMN35883068	PRJNA987026	J	16	<31	Baseline	M	^F508 / ^F508	29	2.31111	G1	homozygous	2	0.30439	2.28132	25	<31	26-30	6	24-60	PAT	PAT
J031	SAMN35883069	PRJNA987026	J	16	<31	Baseline	M	^F508 / ^F508	28	1.81148	G1	homozygous	2	0.21561	2.40397	22	<31	26-30	6	24-60	PAT	PAT
J032	SAMN35883070	PRJNA987026	J	16	<31	Baseline	M	^F508 / ^F508	27	2.86325	G1	homozygous	2	0.326829	2.0649	26	<31	26-30	6	24-60	PAT	PAT
J033	SAMN35883071	PRJNA987026	J	16	<31	Baseline	M	^F508 / ^F508	26	8.31373	G1	homozygous	2	0.413659	1.62963	17	<31	26-30	6	24-60	PAT	PAT
J034	SAMN35883072	PRJNA987026	J	16	<31	Baseline	M	^F508 / ^F508	25	4.70707	G1	homozygous	2	0.454634	2.07978	30	<31	26-30	6	24-60	PAT	PAT
J035	SAMN35883073	PRJNA987026	J	16	<31	Baseline	M	^F508 / ^F508	24	1.67665	G1	homozygous	2	0.273171	2.39915	23	<31	21-25	5	24-60	PAT	PAT
J036	SAMN35883074	PRJNA987026	J	16	<31	Baseline	M	^F508 / ^F508	23	5.42857	G1	homozygous	2	0.333659	1.78422	20.5	<31	21-25	5	24-60	PAT	PAT
J037	SAMN35883075	PRJNA987026	J	16	<31	Baseline	M	^F508 / ^F508	22	4.46479	G1	homozygous	2	0.309268	1.70657	19	<31	21-25	5	<24	PAT	PAT
J038	SAMN35883076	PRJNA987026	J	16	<31	Baseline	M	^F508 / ^F508	21	3.17308	G1	homozygous	2	0.321951	2.00065	23	<31	21-25	5	<24	PAT	PAT
J039	SAMN35883077	PRJNA987026	J	16	<31	Baseline	M	^F508 / ^F508	20	9.37209	G1	homozygous	2	0.393171	1.31751	21	<31	21-25	5	<24	PAT	PAT
J040	SAMN35883078	PRJNA987026	J	16	<31	Baseline	M	^F508 / ^F508	19	26.9444	G1	homozygous	2	0.473171	0.952446	8	<31	16-20	4	<24	PAT	PAT
J041	SAMN35883079	PRJNA987026	J	16	<31	Baseline	M	^F508 / ^F508	18	1.66667	G1	homozygous	2	0.209756	2.17644	22	<31	16-20	4	<24	PAT	PAT
J042	SAMN35883080	PRJNA987026	J	16	<31	Baseline	M	^F508 / ^F508	17	2.90083	G1	homozygous	2	0.342439	1.99027	22	<31	16-20	4	<24	PAT	PAT
J043	SAMN35883081	PRJNA987026	J	16	<31	Baseline	M	^F508 / ^F508	16	9.16667	G1	homozygous	2	0.37561	1.40172	12	<31	16-20	4	<24	PAT	PAT
J044	SAMN35883082	PRJNA987026	J	16	<31	Exacerbation	M	^F508 / ^F508	13	0.914397	G1	homozygous	2	0.229268	2.46538	23	<31	11-15	3	<24	PAT	PAT
J045	SAMN35883083	PRJNA987026	J	16	<31	Exacerbation	M	^F508 / ^F508	12	2.24176	G1	homozygous	2	0.199024	1.68218	20.1667	<31	11-15	3	<24	PAT	PAT
J046	SAMN35883084	PRJNA987026	J	16	<31	Exacerbation	M	^F508 / ^F508	11	2.56757	G1	homozygous	2	0.278049	1.70271	18	<31	11-15	3	<24	PAT	PAT
J047	SAMN35883085	PRJNA987026	J	16	<31	Exacerbation	M	^F508 / ^F508	10	2.76543	G1	homozygous	2	0.218537	1.77406	19	<31	11-15	3	<24	PAT	PAT
J048	SAMN35883086	PRJNA987026	J	16	<31	Exacerbation	M	^F508 / ^F508	9	1.56	G1	homozygous	2	0.190244	1.96148	23	<31	6-10	2	<24	PAT	PAT
J049	SAMN35883087	PRJNA987026	J	16	<31	Exacerbation	M	^F508 / ^F508	8	2.63889	G1	homozygous	2	0.185366	1.39045	19.5	<31	6-10	2	<24	PAT	PAT
J050	SAMN35883088	PRJNA987026	J	16	<31	Exacerbation	M	^F508 / ^F508	7	1.66234	G1	homozygous	2	0.249756	2.06511	23.5	<31	6-10	2	<24	PAT	PAT
J051	SAMN35883089	PRJNA987026	J	16	<31	Exacerbation	M	^F508 / ^F508	6	3.64557	G1	homozygous	2	0.280976	1.7229	20	<31	6-10	2	<24	PAT	PAT
J052	SAMN35883090	PRJNA987026	J	16	<31	Exacerbation	M	^F508 / ^F508	5	2.73913	G1	homozygous	2	0.36878	1.74995	21	<31	6-10	2	<24	PAT	PAT
J053	SAMN35883091	PRJNA987026	J	16	<31	Exacerbation	M	^F508 / ^F508	4	1.18824	G1	homozygous	2	0.197073	2.20462	19	<31	1-5	1	<24	PAT	PAT
J054	SAMN35883092	PRJNA987026	J	16	<31	Exacerbation	M	^F508 / ^F508	3	1.90291	G1	homozygous	2	0.19122	1.9271	21	<31	1-5	1	<24	PAT	PAT
J055	SAMN35883093	PRJNA987026	J	16	<31	Exacerbation	M	^F508 / ^F508	2	1.28105	G1	homozygous	2	0.19122	2.04179	19	<31	1-5	1	<24	PAT	PAT
J056	SAMN35883094	PRJNA987026	J	16	<31	Exacerbation	M	^F508 / ^F508	1	0.536842	G1	homozygous	2	0.0995122	2.40761	25	<31	1-5	1	<24	PAT	PAT
K001	SAMN10871548	PRJNA520924	K	17	38-52	Baseline	M	S1251N / R1066C	56	1.49211	G4	heterozygous	3	0.45561	1.83813	19.5	38-52	56-60	12	24-60	PAT	AN1
K002	SAMN10871549	PRJNA520924	K	17	38-52	Baseline	M	S1251N / R1066C	55	0.399151	G4	heterozygous	5	0.166829	2.46217	27.5	38-52	51-55	11	24-60	AN1	AN1
K003	SAMN10871550	PRJNA520924	K	17	38-52	Baseline	M	S1251N / R1066C	54	0.661605	G4	heterozygous	5	0.293659	2.20597	20	38-52	51-55	11	24-60	AN1	AN1
K004	SAMN10871551	PRJNA520924	K	17	38-52	Baseline	M	S1251N / R1066C	53	1.62388	G4	heterozygous	3	0.518049	1.55543	16.25	38-52	51-55	11	24-60	PAT	AN1
K005	SAMN10871552	PRJNA520924	K	17	38-52	Baseline	M	S1251N / R1066C	52	0.134935	G4	heterozygous	5	0.0712195	2.13906	17	38-52	51-55	11	24-60	AN1	AN1
K006	SAMN10871553	PRJNA520924	K	17	38-52	Baseline	M	S1251N / R1066C	51	1.0561	G4	heterozygous	5	0.393171	1.97254	20.25	38-52	51-55	11	24-60	AN1	AN1
K007	SAMN10871554	PRJNA520924	K	17	38-52	Baseline	M	S1251N / R1066C	50	0.302857	G4	heterozygous	5	0.154146	1.88939	15	38-52	46-50	10	24-60	AN1	AN1
K008	SAMN10871555	PRJNA520924	K	17	38-52	Baseline	M	S1251N / R1066C	49	0.889764	G4	heterozygous	5	0.293659	2.12638	26.25	38-52	46-50	10	24-60	AN1	AN1
K009	SAMN10871556	PRJNA520924	K	17	38-52	Baseline	M	S1251N / R1066C	48	0.814356	G4	heterozygous	5	0.245854	2.26109	24	38-52	46-50	10	24-60	AN1	AN1
K010	SAMN10871557	PRJNA520924	K	17	38-52	Baseline	M	S1251N / R1066C	47	2.80591	G4	heterozygous	3	0.636098	1.49709	18.25	38-52	46-50	10	24-60	PAT	AN1
K011	SAMN10871558	PRJNA520924	K	17	38-52	Baseline	M	S1251N / R1066C	46	0.323944	G4	heterozygous	5	0.176585	2.41874	22	38-52	46-50	10	24-60	AN1	AN1
K012	SAMN10871559	PRJNA520924	K	17	38-52	Baseline	M	S1251N / R1066C	45	0.148829	G4	heterozygous	5	0.0868293	2.28834	20	38-52	41-45	9	24-60	AN1	AN1
K013	SAMN10871560	PRJNA520924	K	17	38-52	Baseline	M	S1251N / R1066C	44	0.182724	G4	heterozygous	5	0.100488	2.617	22	38-52	41-45	9	24-60	AN1	AN1
K014	SAMN10871561	PRJNA520924	K	17	38-52	Baseline	M	S1251N / R1066C	43	0.239617	G4	heterozygous	5	0.141463	2.56281	23	38-52	41-45	9	24-60	AN1	AN1
K015	SAMN10871562	PRJNA520924	K	17	38-52	Baseline	M	S1251N / R1066C	42	0.540373	G4	heterozygous	5	0.203902	2.29961	23.6667	38-52	41-45	9	24-60	AN1	AN1
K016	SAMN10871563	PRJNA520924	K	17	38-52	Baseline	M	S1251N / R1066C	41	0.409781	G4	heterozygous	5	0.235122	1.95284	28.25	38-52	41-45	9	24-60	AN1	AN1
K017	SAMN10871564	PRJNA520924	K	17	38-52	Baseline	M	S1251N / R1066C	40	0.0554054	G4	heterozygous	5	0.0321951	1.9644	20.25	38-52	36-40	8	24-60	AN1	AN1
K018	SAMN10871565	PRJNA520924	K	17	38-52	Baseline	M	S1251N / R1066C	39	0.0785124	G4	heterozygous	5	0.0458537	2.26633	26	38-52	36-40	8	24-60	AN1	AN1
K019	SAMN10871566	PRJNA520924	K	17	38-52	Baseline	M	S1251N / R1066C	38	0.319343	G4	heterozygous	5	0.16	2.21317	26	38-52	36-40	8	24-60	AN1	AN1
K020	SAMN10871567	PRJNA520924	K	17	38-52	Baseline	M	S1251N / R1066C	37	0.5	G4	heterozygous	5	0.230244	2.20641	22	38-52	36-40	8	24-60	AN1	AN1
K021	SAMN10871568	PRJNA520924	K	17	38-52	Baseline	M	S1251N / R1066C	36	0.371795	G4	heterozygous	5	0.186341	2.31427	23	38-52	36-40	8	24-60	AN1	AN1
K022	SAMN10871569	PRJNA520924	K	17	38-52	Baseline	M	S1251N / R1066C	35	0.327835	G4	heterozygous	5	0.15122	2.49698	24	38-52	31-35	7	24-60	AN1	AN1
K023	SAMN10871570	PRJNA520924	K	17	38-52	Baseline	M	S1251N / R1066C	34	0.372	G4	heterozygous	5	0.16878	2.3581	20	38-52	31-35	7	24-60	AN1	AN1
K024	SAMN10871571	PRJNA520924	K	17	38-52	Baseline	M	S1251N / R1066C	33	0.411966	G4	heterozygous	5	0.234146	2.12101	21	38-52	31-35	7	24-60	AN1	AN1
K025	SAMN10871572	PRJNA520924	K	17	38-52	Baseline	M	S1251N / R1066C	32	0.27656	G4	heterozygous	5	0.156098	2.17086	19	38-52	31-35	7	24-60	AN1	AN1
K026	SAMN10871573	PRJNA520924	K	17	38-52	Baseline	M	S1251N / R1066C	31	0.136283	G4	heterozygous	5	0.04	2.27154	22.5	38-52	31-35	7	24-60	AN1	AN1
K027	SAMN10871574	PRJNA520924	K	17	38-52	Baseline	M	S1251N / R1066C	30	0.206439	G4	heterozygous	5	0.100488	2.176	18	38-52	26-30	6	24-60	AN1	AN1
K028	SAMN10871575	PRJNA520924	K	17	38-52	Baseline	M	S1251N / R1066C	29	0.325885	G4	heterozygous	5	0.159024	2.54335	24	38-52	26-30	6	24-60	AN1	AN1
K029	SAMN10871576	PRJNA520924	K	17	38-52	Baseline	M	S1251N / R1066C	28	0.202559	G4	heterozygous	5	0.0760976	2.45321	27.1667	38-52	26-30	6	24-60	AN1	AN1
K030	SAMN10871577	PRJNA520924	K	17	38-52	Baseline	M	S1251N / R1066C	27	0.472817	G4	heterozygous	5	0.266341	2.45832	27	38-52	26-30	6	24-60	AN2	AN1
K031	SAMN10871578	PRJNA520924	K	17	38-52	Baseline	M	S1251N / R1066C	26	0.152574	G4	heterozygous	5	0.0663415	2.50393	32.5	38-52	26-30	6	24-60	AN2	AN1
K032	SAMN10871579	PRJNA520924	K	17	38-52	Baseline	M	S1251N / R1066C	25	0.956731	G4	heterozygous	5	0.385366	2.31317	34.6	38-52	21-25	5	24-60	AN2	AN1
K033	SAMN10871580	PRJNA520924	K	17	38-52	Baseline	M	S1251N / R1066C	24	0.196691	G4	heterozygous	5	0.084878	2.30301	33.125	38-52	21-25	5	24-60	AN2	AN1
K034	SAMN10871582	PRJNA520924	K	17	38-52	Baseline	M	S1251N / R1066C	21	0.255663	G4	heterozygous	5	0.143415	2.83779	41.125	38-52	21-25	5	<24	AN2	AN1
K035	SAMN10871583	PRJNA520924	K	17	38-52	Baseline	M	S1251N / R1066C	20	0.369004	G4	heterozygous	5	0.178537	2.54245	33.5	38-52	16-20	4	<24	AN2	AN1
K036	SAMN10871584	PRJNA520924	K	17	38-52	Baseline	M	S1251N / R1066C	19	3.92308	G4	heterozygous	3	0.519024	1.69724	33.1667	38-52	16-20	4	<24	PAT	AN1
K037	SAMN10871585	PRJNA520924	K	17	38-52	Baseline	M	S1251N / R1066C	18	0.139971	G4	heterozygous	5	0.0936585	2.71506	42.25	38-52	16-20	4	<24	AN2	AN1
K038	SAMN10871586	PRJNA520924	K	17	38-52	Baseline	M	S1251N / R1066C	17	0.218153	G4	heterozygous	5	0.125854	2.86494	45.1667	38-52	16-20	4	<24	AN2	AN1
K039	SAMN10871587	PRJNA520924	K	17	38-52	Baseline	M	S1251N / R1066C	16	0.42623	G4	heterozygous	5	0.193171	2.5642	37.2857	38-52	16-20	4	<24	AN2	AN1
K040	SAMN10871588	PRJNA520924	K	17	38-52	Baseline	M	S1251N / R1066C	15	0.0766823	G4	heterozygous	5	0.0458537	2.44103	37.6667	38-52	11-15	3	<24	AN2	AN1
K041	SAMN35883095	PRJNA987026	K	17	38-52	Exacerbation	M	S1251N / R1066C	14	0.357438	G4	heterozygous	5	0.167805	2.36789	37.7857	38-52	11-15	3	<24	AN2	AN1
K042	SAMN35883096	PRJNA987026	K	17	38-52	Exacerbation	M	S1251N / R1066C	13	0.428862	G4	heterozygous	5	0.181463	2.63402	43.6	38-52	11-15	3	<24	AN2	AN1
K043	SAMN35883097	PRJNA987026	K	17	38-52	Exacerbation	M	S1251N / R1066C	12	0.521989	G4	heterozygous	5	0.260488	2.34985	48.25	38-52	11-15	3	<24	AN2	AN1
K044	SAMN35883098	PRJNA987026	K	17	38-52	Exacerbation	M	S1251N / R1066C	11	0.227496	G4	heterozygous	5	0.132683	2.66185	37	38-52	11-15	3	<24	AN2	AN1
K045	SAMN35883099	PRJNA987026	K	17	38-52	Exacerbation	M	S1251N / R1066C	10	0.213816	G4	heterozygous	5	0.115122	2.91115	49	38-52	6-10	2	<24	AN2	AN1
K046	SAMN35883100	PRJNA987026	K	17	38-52	Exacerbation	M	S1251N / R1066C	9	0.115207	G4	heterozygous	5	0.0702439	2.63518	52.5	38-52	6-10	2	<24	AN2	AN1
K047	SAMN35883101	PRJNA987026	K	17	38-52	Exacerbation	M	S1251N / R1066C	8	0.166397	G4	heterozygous	5	0.0956098	2.72871	38	38-52	6-10	2	<24	AN2	AN1
K048	SAMN35883102	PRJNA987026	K	17	38-52	Exacerbation	M	S1251N / R1066C	7	0.178808	G4	heterozygous	5	0.0858537	2.36418	45.25	38-52	6-10	2	<24	AN2	AN1
K049	SAMN35883103	PRJNA987026	K	17	38-52	Exacerbation	M	S1251N / R1066C	6	0.138182	G4	heterozygous	5	0.0682927	2.43073	24	38-52	6-10	2	<24	AN1	AN1
K050	SAMN35883104	PRJNA987026	K	17	38-52	Exacerbation	M	S1251N / R1066C	5	0.703226	G4	heterozygous	2	0.210732	2.10762	21.5	38-52	1-5	1	<24	PAT	AN1
K051	SAMN35883105	PRJNA987026	K	17	38-52	Exacerbation	M	S1251N / R1066C	4	0.137255	G4	heterozygous	5	0.0653659	2.24533	23.6667	38-52	1-5	1	<24	AN1	AN1
K052	SAMN35883106	PRJNA987026	K	17	38-52	Exacerbation	M	S1251N / R1066C	3	0.2407	G4	heterozygous	5	0.102439	2.20793	25	38-52	1-5	1	<24	AN1	AN1
K053	SAMN35883107	PRJNA987026	K	17	38-52	Exacerbation	M	S1251N / R1066C	2	0.102134	G4	heterozygous	5	0.057561	2.30335	23	38-52	1-5	1	<24	AN1	AN1
K054	SAMN35883108	PRJNA987026	K	17	38-52	Exacerbation	M	S1251N / R1066C	1	0.0826446	G4	heterozygous	5	0.0439024	2.47803	23	38-52	1-5	1	<24	AN1	AN1
K055	SAMN35883109	PRJNA987026	K	18	38-52	Baseline	M	S1251N / R1066C	58	0.174312	G4	heterozygous	5	0.110244	2.31604	25	38-52	56-60	12	24-60	AN1	AN1
K056	SAMN35883110	PRJNA987026	K	18	38-52	Baseline	M	S1251N / R1066C	57	0.29588	G4	heterozygous	5	0.142439	2.06988	22	38-52	56-60	12	24-60	AN1	AN1
K057	SAMN35883111	PRJNA987026	K	18	38-52	Baseline	M	S1251N / R1066C	56	0.364261	G4	heterozygous	5	0.194146	2.13165	29	38-52	56-60	12	24-60	AN1	AN1
K058	SAMN35883112	PRJNA987026	K	18	38-52	Baseline	M	S1251N / R1066C	55	0.734375	G4	heterozygous	5	0.309268	2.23984	28	38-52	51-55	11	24-60	AN2	AN1
K059	SAMN35883113	PRJNA987026	K	18	38-52	Baseline	M	S1251N / R1066C	54	0.246575	G4	heterozygous	5	0.130732	2.45725	28	38-52	51-55	11	24-60	AN1	AN1
K060	SAMN35883114	PRJNA987026	K	18	38-52	Baseline	M	S1251N / R1066C	53	0.153094	G4	heterozygous	5	0.0829268	2.66329	26.5	38-52	51-55	11	24-60	AN1	AN1
K061	SAMN35883115	PRJNA987026	K	18	38-52	Baseline	M	S1251N / R1066C	52	0.0508221	G4	heterozygous	6	0.0302439	2.32322	28.5	38-52	51-55	11	24-60	AN1	AN1
K062	SAMN35883116	PRJNA987026	K	18	38-52	Baseline	M	S1251N / R1066C	51	0.423664	G4	heterozygous	5	0.205854	2.47143	25.5	38-52	51-55	11	24-60	AN1	AN1
K063	SAMN35883117	PRJNA987026	K	18	38-52	Baseline	M	S1251N / R1066C	50	0.214744	G4	heterozygous	5	0.123902	2.51069	28	38-52	46-50	10	24-60	AN1	AN1
K064	SAMN35883118	PRJNA987026	K	18	38-52	Baseline	M	S1251N / R1066C	49	0.104235	G4	heterozygous	5	0.0585366	2.1794	22.25	38-52	46-50	10	24-60	AN1	AN1
K065	SAMN35883119	PRJNA987026	K	18	38-52	Baseline	M	S1251N / R1066C	48	0.40177	G4	heterozygous	5	0.188293	2.52398	25.25	38-52	46-50	10	24-60	AN1	AN1
K066	SAMN35883120	PRJNA987026	K	18	38-52	Baseline	M	S1251N / R1066C	47	1.01456	G4	heterozygous	3	0.39122	2.27746	23	38-52	46-50	10	24-60	PAT	AN1
K067	SAMN35883121	PRJNA987026	K	18	38-52	Baseline	M	S1251N / R1066C	46	0.316667	G4	heterozygous	5	0.16	2.32273	22	38-52	46-50	10	24-60	AN1	AN1
K068	SAMN35883122	PRJNA987026	K	18	38-52	Baseline	M	S1251N / R1066C	45	0.101724	G4	heterozygous	6	0.0556098	2.2395	22	38-52	41-45	9	24-60	AN1	AN1
K069	SAMN35883123	PRJNA987026	K	18	38-52	Baseline	M	S1251N / R1066C	44	0.362617	G4	heterozygous	5	0.187317	2.27827	23.25	38-52	41-45	9	24-60	AN1	AN1
K070	SAMN35883124	PRJNA987026	K	18	38-52	Baseline	M	S1251N / R1066C	43	0.272109	G4	heterozygous	5	0.150244	2.62256	29	38-52	41-45	9	24-60	AN2	AN1
K071	SAMN35883125	PRJNA987026	K	18	38-52	Baseline	M	S1251N / R1066C	42	0.296992	G4	heterozygous	5	0.148293	2.48474	30	38-52	41-45	9	24-60	AN2	AN1
K072	SAMN35883126	PRJNA987026	K	18	38-52	Baseline	M	S1251N / R1066C	41	0.409807	G4	heterozygous	5	0.219512	2.4145	20	38-52	41-45	9	24-60	AN1	AN1
K073	SAMN35883127	PRJNA987026	K	18	38-52	Baseline	M	S1251N / R1066C	40	1.52514	G4	heterozygous	3	0.503415	2.02539	27	38-52	36-40	8	24-60	PAT	AN1
K074	SAMN35883128	PRJNA987026	K	18	38-52	Baseline	M	S1251N / R1066C	39	0.537832	G4	heterozygous	5	0.24878	2.33615	24.25	38-52	36-40	8	24-60	AN1	AN1
K075	SAMN35883129	PRJNA987026	K	18	38-52	Baseline	M	S1251N / R1066C	38	0.306273	G4	heterozygous	5	0.15122	2.51644	25	38-52	36-40	8	24-60	AN1	AN1
K076	SAMN35883130	PRJNA987026	K	18	38-52	Baseline	M	S1251N / R1066C	37	0.611111	G4	heterozygous	5	0.258537	2.54378	26	38-52	36-40	8	24-60	AN1	AN1
K077	SAMN35883131	PRJNA987026	K	18	38-52	Baseline	M	S1251N / R1066C	36	0.192582	G4	heterozygous	5	0.108293	2.50272	24	38-52	36-40	8	24-60	AN1	AN1
K078	SAMN35883132	PRJNA987026	K	18	38-52	Baseline	M	S1251N / R1066C	35	0.138235	G4	heterozygous	5	0.0858537	2.63478	25	38-52	31-35	7	24-60	AN1	AN1
K079	SAMN35883133	PRJNA987026	K	18	38-52	Baseline	M	S1251N / R1066C	34	0.214022	G4	heterozygous	5	0.106341	2.36994	21	38-52	31-35	7	24-60	AN1	AN1
K080	SAMN35883134	PRJNA987026	K	18	38-52	Baseline	M	S1251N / R1066C	33	0.32363	G4	heterozygous	5	0.160976	2.38041	22.25	38-52	31-35	7	24-60	AN1	AN1
K081	SAMN35883135	PRJNA987026	K	18	38-52	Baseline	M	S1251N / R1066C	32	0.228951	G4	heterozygous	5	0.12878	2.57218	23.25	38-52	31-35	7	24-60	AN1	AN1
K082	SAMN35883136	PRJNA987026	K	18	38-52	Baseline	M	S1251N / R1066C	28	5.09756	G4	heterozygous	3	0.595122	1.52497	17	38-52	26-30	6	24-60	PAT	AN1
K083	SAMN35883137	PRJNA987026	K	18	38-52	Baseline	M	S1251N / R1066C	27	0.466425	G4	heterozygous	5	0.232195	2.52953	34	38-52	26-30	6	24-60	AN2	AN1
K084	SAMN35883138	PRJNA987026	K	18	38-52	Baseline	M	S1251N / R1066C	26	0.354369	G4	heterozygous	5	0.136585	2.56168	29.125	38-52	26-30	6	24-60	AN1	AN1
K085	SAMN35883139	PRJNA987026	K	18	38-52	Baseline	M	S1251N / R1066C	25	0.481236	G4	heterozygous	5	0.204878	2.55478	31.1667	38-52	21-25	5	24-60	AN2	AN1
K086	SAMN35883140	PRJNA987026	K	18	38-52	Baseline	M	S1251N / R1066C	24	0.454361	G4	heterozygous	5	0.213659	2.23115	18	38-52	21-25	5	24-60	AN1	AN1
K087	SAMN35883141	PRJNA987026	K	18	38-52	Baseline	M	S1251N / R1066C	23	0.312236	G4	heterozygous	5	0.137561	2.55146	22	38-52	21-25	5	<24	AN1	AN1
K088	SAMN35883142	PRJNA987026	K	18	38-52	Baseline	M	S1251N / R1066C	22	0.261044	G4	heterozygous	5	0.120976	2.49261	26.25	38-52	21-25	5	<24	AN1	AN1
K089	SAMN35883143	PRJNA987026	K	18	38-52	Baseline	M	S1251N / R1066C	21	0.944882	G4	heterozygous	5	0.333659	2.28249	27	38-52	21-25	5	<24	AN2	AN1
K090	SAMN35883144	PRJNA987026	K	18	38-52	Baseline	M	S1251N / R1066C	20	2.22527	G4	heterozygous	2	0.357073	2.12706	18	38-52	16-20	4	<24	PAT	AN1
K091	SAMN35883145	PRJNA987026	K	18	38-52	Baseline	M	S1251N / R1066C	19	4.23418	G4	heterozygous	3	0.612683	1.61038	18.5	38-52	16-20	4	<24	PAT	AN1
K092	SAMN35883146	PRJNA987026	K	18	38-52	Baseline	M	S1251N / R1066C	18	1.28529	G4	heterozygous	3	0.376585	2.30744	22	38-52	16-20	4	<24	PAT	AN1
K093	SAMN35883147	PRJNA987026	K	18	38-52	Baseline	M	S1251N / R1066C	17	0.409091	G4	heterozygous	5	0.134634	2.48403	23.5	38-52	16-20	4	<24	AN1	AN1
K094	SAMN35883148	PRJNA987026	K	18	38-52	Baseline	M	S1251N / R1066C	16	1.00627	G4	heterozygous	5	0.305366	2.13785	18	38-52	16-20	4	<24	AN1	AN1
K095	SAMN35883149	PRJNA987026	K	18	38-52	Baseline	M	S1251N / R1066C	15	1.07046	G4	heterozygous	3	0.363902	2.3763	22.5	38-52	11-15	3	<24	PAT	AN1
K096	SAMN35883150	PRJNA987026	K	18	38-52	Exacerbation	M	S1251N / R1066C	12	1.27895	G4	heterozygous	3	0.450732	2.12777	23	38-52	11-15	3	<24	PAT	AN1
K097	SAMN35883151	PRJNA987026	K	18	38-52	Exacerbation	M	S1251N / R1066C	11	1.62034	G4	heterozygous	3	0.432195	2.09049	18	38-52	11-15	3	<24	PAT	AN1
K098	SAMN35883152	PRJNA987026	K	18	38-52	Exacerbation	M	S1251N / R1066C	10	0.789757	G4	heterozygous	5	0.277073	2.34412	21	38-52	6-10	2	<24	AN1	AN1
K099	SAMN35883153	PRJNA987026	K	18	38-52	Exacerbation	M	S1251N / R1066C	9	0.837466	G4	heterozygous	5	0.260488	2.34031	27	38-52	6-10	2	<24	AN1	AN1
K100	SAMN35883154	PRJNA987026	K	18	38-52	Exacerbation	M	S1251N / R1066C	8	1.00279	G4	heterozygous	3	0.296585	2.13962	19	38-52	6-10	2	<24	PAT	AN1
K101	SAMN35883155	PRJNA987026	K	18	38-52	Exacerbation	M	S1251N / R1066C	7	0.309237	G4	heterozygous	5	0.119024	2.50803	18	38-52	6-10	2	<24	AN1	AN1
K102	SAMN35883156	PRJNA987026	K	18	38-52	Exacerbation	M	S1251N / R1066C	6	1.57823	G4	heterozygous	3	0.347317	2.45659	28	38-52	6-10	2	<24	PAT	AN1
K103	SAMN35883157	PRJNA987026	K	18	38-52	Exacerbation	M	S1251N / R1066C	5	1.69196	G4	heterozygous	2	0.258537	2.43533	29	38-52	1-5	1	<24	PAT	AN1
K104	SAMN35883158	PRJNA987026	K	18	38-52	Exacerbation	M	S1251N / R1066C	4	4.04142	G4	heterozygous	3	0.588293	1.7576	22.5	38-52	1-5	1	<24	PAT	AN1
K105	SAMN35883159	PRJNA987026	K	18	38-52	Exacerbation	M	S1251N / R1066C	3	0.141553	G4	heterozygous	5	0.0780488	2.62342	21.5	38-52	1-5	1	<24	AN1	AN1
K106	SAMN35883160	PRJNA987026	K	18	38-52	Exacerbation	M	S1251N / R1066C	2	0.411439	G4	heterozygous	5	0.148293	2.81548	27.1667	38-52	1-5	1	<24	AN1	AN1
K107	SAMN35883161	PRJNA987026	K	18	38-52	Exacerbation	M	S1251N / R1066C	1	1.11399	G4	heterozygous	3	0.388293	2.33894	26	38-52	1-5	1	<24	PAT	AN1
